# Supplementary material for: Utilization of carbon disulfide as a powerful building block for the synthesis of 2-aminobenzoxazoles
Source: Royal Society of Chemistry journal article supplement (doi:10.1039/c3ra41189c), 2013-01-01
Supplement: c3ra41189c.pdf [file c3ra41189c.pdf]

## Supporting Information

### Utilization of carbon disulfide as a powerful building block for the synthesis of 2-aminobenzoxazoles

Tirumaleswararao G, Bharat Kumar Allam and Krishna Nand Singh\*

Department of Chemistry (Centre of Advanced Study), Faculty of Science,  
Banaras Hindu University, Varanasi 221005, India

\*E mail: [knsinghbhu@yahoo.co.in](mailto:knsinghbhu@yahoo.co.in)

## Table of Contents

---

|                                                                               |                          |
|-------------------------------------------------------------------------------|--------------------------|
| <b>I. General Experimental Section.....</b>                                   | <b>B<sub>3</sub></b>     |
| <b>II. General Experimental Procedure.....</b>                                | <b>B<sub>3</sub></b>     |
| <b>III. Physical and Spectroscopic Data for Products.....</b>                 | <b>B<sub>4-10</sub></b>  |
| <b>IV. References.....</b>                                                    | <b>B<sub>11</sub></b>    |
| <b>V. Copies of <sup>1</sup>H and <sup>13</sup>C Spectra of Products.....</b> | <b>B<sub>12-57</sub></b> |

---

### **I. General Experimental Section:**

$^1\text{H}$  and  $^{13}\text{C}$  NMR spectra were run on 300 MHz and 75 MHz JEOL AL300 FTNMR spectrometer respectively at a temperature of 300 K. NMR chemical shifts are expressed in  $\delta$  values with reference to tetramethylsilane (TMS) as an internal standard.

All reagents were procured from Aldrich, USA, and were used without further purification. The solvents were purified and dried according to standard methods prior to use. All reactions were carried out under an atmosphere of air. Reactions were monitored by thin-layer chromatography (TLC) carried out on silica gel 60/KieselguhrF<sub>254</sub> pre-coated on aluminium sheets (thickness 0.2 mm), commercially available from Merck, using ultra-violet light as the visualizing agent and I<sub>2</sub> as the developing agent.

### **II. General Experimental Procedure:**

A mixture of amine (**1**, 1.5 mmol) and CS<sub>2</sub> (**2**, 1.5 mmol) was taken in a 25-mL round bottomed (R.B) flask with a magnetic stir bar, and then stirred thoroughly for 60 min, which resulted in the formation of the intermediate dithiocarbamate (**DTC**). To it was added 2-aminophenol (**3**, 1 mmol), and the mixture contained in the R.B flask equipped with a condenser, was then heated at a temperature of 110 °C in an oil bath for 3 h. On completion of the reaction (TLC), the resulting mixture was subsequently partitioned between ethyl acetate (5 mL) and water (10 mL). The aqueous layer was extracted thrice with ethyl acetate (5 mL) and the collected organic phase was dried (anhyd.Na<sub>2</sub>SO<sub>4</sub>), concentrated under vacuum and then purified by column chromatography on silica gel using mixtures of ethyl acetate and hexane as eluting agent.

### III. Physical and spectroscopic data for compounds

#### 1. 2-(1-Piperidinyl)-benzoxazole (4a):<sup>2</sup>

Colorless amorphous solid;

<sup>1</sup>H NMR (300 MHz, CDCl<sub>3</sub>, TMS, 300 K):  $\delta$  = 7.34–7.31 (m, 1H), 7.22–7.20 (m, 1H), 7.14–7.12 (m, 1H), 7.09–6.99 (m, 1H), 3.62 (br s, 4H), 1.64 (br s, 6H) ppm.

<sup>13</sup>C NMR (75 MHz, CDCl<sub>3</sub>, TMS, 300 K):  $\delta$  = 162.1, 148.4, 143.0, 123.5, 120.0, 115.6, 108.2, 46.3, 25.0, 23.8 ppm.

#### 2. 2-(4-Morpholinyl)-benzoxazole (4b):<sup>3</sup>

Colorless solid;

<sup>1</sup>H NMR (300 MHz, CDCl<sub>3</sub>, TMS, 300 K):  $\delta$  = 7.38 (d,  $J$  = 9.0 Hz, 1H), 7.28 (d,  $J$  = 9.0 Hz, 1H), 7.20–7.15 (m, 1H), 7.07–7.01 (m, 1H), 3.84–3.80 (m, 4H), 3.71–3.68 (m, 4H) ppm.

<sup>13</sup>C NMR (75 MHz, CDCl<sub>3</sub>, TMS, 300 K):  $\delta$  = 162.1, 148.7, 142.7, 124.1, 120.9, 116.4, 108.8, 66.2, 45.7 ppm.

#### 3. *N,N*-Diethyl-2-benzoxazolamine (4c):<sup>4</sup>

Colourless liquid;

<sup>1</sup>H NMR (300 MHz, CDCl<sub>3</sub>, TMS, 300 K):  $\delta$  = 7.36 (d,  $J$  = 9.0 Hz, 1H), 7.25 (d,  $J$  = 9.0 Hz, 1H), 7.13 (t,  $J$  = 7.5 Hz, 1H), 6.97 (t,  $J$  = 7.5 Hz, 1H), 3.61 (dd,  $J$  = 7.2 Hz,  $J$  = 6.9 Hz, 4H), 1.27 (t,  $J$  = 7.2 Hz, 6H) ppm.

<sup>13</sup>C NMR (75 MHz, CDCl<sub>3</sub>, TMS, 300 K):  $\delta$  = 162.1, 148.7, 143.6, 123.7, 119.8, 115.7, 108.4, 42.8, 13.4 ppm.

**4. 2-(Dimethylamino)-benzoxazole (4d):**<sup>5, 10</sup>

Orange solid;

<sup>1</sup>H NMR (300 MHz, CDCl<sub>3</sub>, TMS, 300 K):  $\delta$  = 7.36 (d,  $J$  = 9.0 Hz, 1H), 7.26 (d,  $J$  = 9.0 Hz, 1H), 7.14 (t,  $J$  = 7.5 Hz, 1H), 6.99 (t,  $J$  = 7.5 Hz, 1H), 3.20 (s, 6H) ppm.

<sup>13</sup>C NMR (75 MHz, CDCl<sub>3</sub>, TMS, 300 K):  $\delta$  = 163.0, 149.0, 143.4, 139.2, 123.9, 120.2, 115.9, 108.6, 37.7, 31.9, 29.7 ppm.

**5. N-Benzyl-N-methylbenzoxazol-2-amine (4e):**<sup>9</sup>

Colorless solid;

<sup>1</sup>H NMR (300 MHz, CDCl<sub>3</sub>, TMS, 300 K):  $\delta$  = 7.39 (d,  $J$  = 7.8 Hz, 1H), 7.29–7.22 (m, 6H), 7.14 (t,  $J$  = 7.5 Hz, 1H), 6.98 (t,  $J$  = 7.5 Hz, 1H), 4.71 (s, 2H), 3.08 (s, 3H) ppm.

<sup>13</sup>C NMR (75 MHz, CDCl<sub>3</sub>, TMS, 300 K):  $\delta$  = 162.8, 148.8, 143.4, 136.2, 128.5, 127.5, 127.4, 123.8, 120.2, 115.9, 108.5, 53.6, 34.9 ppm.

**6. N-Hexylbenzoxazol-2-amine (4f):**<sup>6</sup>

Orange-red solid;

<sup>1</sup>H NMR (300 MHz, CDCl<sub>3</sub>, TMS, 300 K):  $\delta$  = 7.34 (d,  $J$  = 7.5 Hz, 1H), 7.24 (d,  $J$  = 7.8 Hz, 1H), 7.14 (t,  $J$  = 7.5 Hz, 1H), 6.99 (t,  $J$  = 7.5 Hz, 1H), 6.21 (br s, 1H), 3.48–3.44 (m, 2H), 1.68–1.64 (m, 2H), 1.38–1.30 (m, 6H), 0.87 (br s, 3H) ppm.

<sup>13</sup>C NMR (75 MHz, CDCl<sub>3</sub>, TMS, 300 K):  $\delta$  = 162.4, 148.3, 142.9, 123.7, 120.4, 115.8, 108.5, 43.0, 31.3, 29.7, 26.4, 22.4, 13.9 ppm.

**7. N-Cyclopropylbenzoxazol-2-amine (4g):**

Product formation was not observed.

### 8. *n*-Butyl-2-Benzoxazamine (4h):<sup>7</sup>

Yellow solid;

<sup>1</sup>H NMR (300 MHz, CDCl<sub>3</sub>, TMS, 300 K):  $\delta$  = 7.35 (d,  $J$  = 7.8 Hz, 1H), 7.24 (d,  $J$  = 8.1 Hz, 1H), 7.15 (t,  $J$  = 7.5 Hz, 1H), 7.00 (t,  $J$  = 7.5 Hz, 1H), 5.88 (br s, 1H), 3.50–3.45 (m, 2H), 1.69–1.61 (m, 2H), 1.46–1.39 (m, 2H), 0.97–0.92 (m, 3H) ppm.

<sup>13</sup>C NMR (75 MHz, CDCl<sub>3</sub>, TMS, 300 K):  $\delta$  = 162.3, 148.4, 143.0, 123.8, 120.5, 116.0, 108.6, 42.8, 31.8, 19.9, 13.7 ppm.

### 9. *N,N*-Dibutylbenzoxazol-2-amine (4i):<sup>11</sup>

Pale yellow liquid;

<sup>1</sup>H NMR (300 MHz, CDCl<sub>3</sub>, TMS, 300 K):  $\delta$  = 7.35 (d,  $J$  = 7.8 Hz, 1H), 7.23 (d,  $J$  = 7.8 Hz, 1H), 7.12 (t,  $J$  = 7.5 Hz, 1H), 6.95 (t,  $J$  = 7.5 Hz, 1H), 3.49 (t,  $J$  = 7.5 Hz, 4H), 1.70–1.60 (m, 4H), 1.44–1.32 (m, 4H), 0.98–0.93 (m, 6H) ppm.

<sup>13</sup>C NMR (75 MHz, CDCl<sub>3</sub>, TMS, 300 K):  $\delta$  = 162.5, 148.6, 143.6, 123.6, 119.7, 115.7, 108.3, 48.2, 30.0, 19.9, 13.8 ppm.

### 10. *N*-Cyclohexylbenzoxazol-2-amine (4j):<sup>9</sup>

Yellow solid;

<sup>1</sup>H NMR (300 MHz, CDCl<sub>3</sub>, TMS, 300 K):  $\delta$  = 7.35 (d,  $J$  = 7.8 Hz, 1H), 7.23 (d,  $J$  = 7.8 Hz, 1H), 7.14 (t,  $J$  = 7.5 Hz, 1H), 6.99 (m, 1H), 5.98 (br s, 1H), 3.74 (br s, 1H), 2.14–2.10 (m, 2H), 1.77–1.62 (m, 3H), 1.47–1.18 (m, 5H) ppm.

<sup>13</sup>C NMR (75 MHz, CDCl<sub>3</sub>, TMS, 300 K):  $\delta$  = 161.5, 148.2, 142.9, 123.7, 120.4, 115.9, 108.5, 52.0, 33.4, 25.4, 24.7 ppm.

**11. *N*-(Tert-butyl)benzoxazol-2-amine (4k):**<sup>9</sup>

Yellow solid;

<sup>1</sup>H NMR (300 MHz, CDCl<sub>3</sub>, TMS, 300 K): δ = 7.38 (d, *J* = 7.8 Hz, 1H), 7.26–7.23 (m, 1H), 7.19–7.12 (m, 1H), 7.04–6.99 (m, 1H), 5.48 (br s, 1H), 1.50 (s, 9H) ppm.

<sup>13</sup>C NMR (75 MHz, CDCl<sub>3</sub>, TMS, 300 K): δ = 161.0, 148.1, 142.8, 123.7, 120.6, 116.0, 108.6, 52.1, 29.2 ppm.

**12. *N*-Phenethylbenzoxazol-2-amine (4l):**<sup>9</sup>

Light cream solid;

<sup>1</sup>H NMR (300 MHz, CDCl<sub>3</sub>, TMS, 300 K): δ = 7.33–7.11 (m, 8H), 7.02–6.97 (m, 1H), 5.91 (br s, 1H), 3.70 (t, *J* = 6.6 Hz, 2H), 2.96 (t, *J* = 6.9 Hz, 2H) ppm.

<sup>13</sup>C NMR (75 MHz, CDCl<sub>3</sub>, TMS, 300 K): δ = 162.0, 148.3, 142.8, 128.7, 128.5, 126.5, 123.8, 120.6, 116.0, 108.6, 44.0, 35.7 ppm.

**13. *N*-Benzylbenzoxazol-2-amine (4m):**<sup>8,9</sup>

Yellow solid;

<sup>1</sup>H NMR (300 MHz, CDCl<sub>3</sub>, TMS, 300 K): δ = 7.38–7.27 (m, 5H), 7.20 (t, *J* = 7.8 Hz, 2H), 7.11 (t, *J* = 7.5 Hz, 1H), 6.99 (t, *J* = 7.5 Hz, 1H), 4.64 (s, 2H) ppm.

<sup>13</sup>C NMR (75 MHz, CDCl<sub>3</sub>, TMS, 300 K): δ = 162.1, 148.4, 142.7, 137.4, 128.7, 127.7, 127.5, 123.9, 120.7, 116.1, 108.7, 46.9 ppm.

**14. *N,N*-Dipropylbenzoxazol-2-amine (4n):**<sup>11</sup>

Colorless oil;

$^1\text{H}$  NMR (300 MHz,  $\text{CDCl}_3$ , TMS, 300 K):  $\delta$  = 7.35 (d,  $J$  = 7.5 Hz, 1H), 7.24 (d,  $J$  = 8.1 Hz, 1H), 7.12 (t,  $J$  = 7.5 Hz, 1H), 6.96 (t,  $J$  = 7.5 Hz, 1H), 3.49–3.44 (m, 4H), 1.74–1.66 (m, 4H), 0.98–0.93 (m, 6H) ppm.

$^{13}\text{C}$  NMR (75 MHz,  $\text{CDCl}_3$ , TMS, 300 K):  $\delta$  = 162.5, 148.6, 143.6, 123.6, 119.8, 115.6, 108.3, 50.2, 21.1, 11.1 ppm.

### 15. 5-Methyl-2-(piperidin-1-yl)benzoxazole (4o):<sup>10</sup>

Colorless solid;

$^1\text{H}$  NMR (300 MHz,  $\text{CDCl}_3$ , TMS, 300 K):  $\delta$  = 7.13–7.08 (m, 2H), 6.80 (d,  $J$  = 8.1 Hz, 1H), 3.65 (br s, 4H), 2.37 (s, 3H), 1.67 (br s, 6H) ppm.

$^{13}\text{C}$  NMR (75 MHz,  $\text{CDCl}_3$ , TMS, 300 K):  $\delta$  = 162.6, 146.7, 143.1, 133.5, 121.0, 116.2, 110.3, 107.9, 46.5, 25.2, 24.0, 21.5 ppm.

### 16. *N,N*-Diethyl-5-methylbenzoxazol-2-amine (4p):<sup>4</sup>

Pale yellow solid;

$^1\text{H}$  NMR (300 MHz,  $\text{CDCl}_3$ , TMS, 300 K):  $\delta$  = 7.14–7.09 (m, 2H), 6.79 (d,  $J$  = 8.1 Hz, 1H), 3.61–3.54 (m, 4H), 2.38 (s, 3H), 1.29–1.24 (m, 6H) ppm.

$^{13}\text{C}$  NMR (75 MHz,  $\text{CDCl}_3$ , TMS, 300 K):  $\delta$  = 161.6, 146.1, 143.5, 133.4, 120.5, 116.1, 107.8, 42.9, 21.5, 13.4 ppm.

### 17. *N,N*-Dibutyl-5-methylbenzoxazol-2-amine (4q):<sup>11</sup>

Colorless solid;

$^1\text{H}$  NMR (300 MHz,  $\text{CDCl}_3$ , TMS, 300 K):  $\delta$  = 7.06 (s, 1H), 7.03 (d,  $J$  = 9.0 Hz, 1H), 6.70 (d,  $J$  = 8.1 Hz, 1H), 3.41 (t,  $J$  = 7.5 Hz, 4H), 2.28 (s, 3H), 1.63–1.52 (m, 4H), 1.36–1.18 (m, 4H), 0.90–0.85 (m, 6H) ppm.



$^{13}\text{C}$  NMR (75 MHz,  $\text{CDCl}_3$ , TMS, 300 K):  $\delta$  = 162.8, 146.9, 143.8, 133.3, 120.4, 116.2, 107.7, 48.3, 30.1, 21.5, 20.0, 13.9 ppm.

**18. 2-Morpholino-5-nitrobenzoxazole (4r):**<sup>10</sup>

Bright yellow solid;

$^1\text{H}$  NMR (300 MHz,  $\text{CDCl}_3$ , TMS, 300 K):  $\delta$  = 8.17 (s, 1H), 8.03 (d,  $J$  = 8.7 Hz, 1H), 7.33–7.27 (m, 1H), 3.86–3.83 (m, 4H), 3.75–3.72 (m, 4H) ppm.

$^{13}\text{C}$  NMR (75 MHz,  $\text{CDCl}_3$ , TMS, 300 K):  $\delta$  = 163.2, 152.6, 145.2, 143.8, 117.3, 111.9, 108.4, 66.0, 45.6, 29.7 ppm.

**19. *N,N*-Diethyl-5-nitrobenzoxazol-2-amine (4s):**<sup>4</sup>

Light yellow solid;

$^1\text{H}$  NMR (300 MHz,  $\text{CDCl}_3$ , TMS, 300 K):  $\delta$  = 8.13 (s, 1H), 7.96–7.92 (m, 1H), 7.29 (d,  $J$  = 8.7 Hz, 1H), 3.65–3.58 (m, 4H), 1.34–1.29 (t,  $J$  = 6.9 Hz, 6H) ppm.

$^{13}\text{C}$  NMR (75 MHz,  $\text{CDCl}_3$ , TMS, 300 K):  $\delta$  = 163.6, 152.8, 144.9, 144.6, 116.4, 111.0, 107.9, 43.2, 13.2 ppm.

**20. 5-Nitro-2-(piperidin-1-yl)benzoxazole (4t):**<sup>10</sup>

Bright yellow solid;

$^1\text{H}$  NMR (300 MHz,  $\text{CDCl}_3$ , TMS, 300 K):  $\delta$  = 8.12 (s, 1H), 7.97–7.94 (m, 1H), 7.28 (d,  $J$  = 8.7 Hz, 1H), 3.70 (br s, 4H), 1.72 (br s, 6H) ppm.

$^{13}\text{C}$  NMR (75 MHz,  $\text{CDCl}_3$ , TMS, 300 K):  $\delta$  = 163.7, 152.6, 145.0, 144.4, 116.7, 111.2, 108.0, 46.6, 25.1, 23.8 ppm.

**21. *N,N*-Dimethyl-5-nitrobenzoxazol-2-amine (4u):**<sup>3</sup>

Orange solid;

<sup>1</sup>H NMR (300 MHz, CDCl<sub>3</sub>, TMS, 300 K): δ = 8.16 (s, 1H), 7.99–7.96 (m, 1H), 7.31 (d, *J* = 9.0 Hz, 1H), 3.25 (s, 6H) ppm.

**22. 2-Mercaptobenzoxazole (6):**<sup>12</sup>

Colorless solid;

<sup>1</sup>H NMR (300 MHz, CDCl<sub>3</sub>, TMS, 300 K): δ = 10.79 (br s, 1H), 7.36–7.23 (m, 4H) ppm.

<sup>13</sup>C NMR (75 MHz, CDCl<sub>3</sub>, TMS, 300 K): δ = 181.0, 148.9, 130.4, 125.3, 124.4, 115.2, 110.5, 110.2 ppm.

**23. Piperidin-1-ium piperidine-1-carbodithioate (5):**

Colorless solid;

<sup>1</sup>H NMR (300 MHz, CDCl<sub>3</sub>, TMS, 300 K): δ = 9.01 (br s, 2H), 4.38–4.35 (m, 4H), 3.34 (m, 4H), 1.91–1.84 (m, 6H), 1.63–1.59 (m, 6H) ppm.

<sup>13</sup>C NMR (75 MHz, CDCl<sub>3</sub>, TMS, 300 K): δ = 208.5, 51.8, 45.0, 26.0, 24.3, 22.6, 22.4 ppm.

**24. 1,3-Diphenethylthiourea (8):**<sup>1</sup>

Pale brown solid;

<sup>1</sup>H NMR (300 MHz, CDCl<sub>3</sub>, TMS, 300 K): δ = 7.26–7.13 (m, 10H), 5.93 (br s, 2H), 3.59 (br s, 4H), 2.81 (t, *J* = 6.6 Hz, 4H) ppm.

$^{13}\text{C}$  NMR (75 MHz,  $\text{CDCl}_3$ , TMS, 300 K):  $\delta$  = 181.5, 138.2, 128.6, 128.5, 126.6, 45.3, 35.0 ppm.

#### IV. References:

1. M. R. Maddani and K. R. Prabhu, *J. Org. Chem.*, 2010, **75**, 2327.
2. M. Lamani and K. R. Prabhu, *J. Org. Chem.*, 2011, **76**, 7938.
3. S. H. Cho, J. Y. Kim, S. Y. Lee and S. Chang, *Angew. Chem. Int. Ed.*, 2009, **48**, 9127.
4. S. Guo, B. Qian, Y. Xie, C. Xie and H. Huang, *Org. Lett.*, 2011, **13**, 522.
5. M. Zhang, S. Zhang, M. Liu and J. Cheng, *Chem. Commun.*, 2011, **47**, 11522.
6. A. Hetzheim, G. Schlaak and C. Kerstan, *Pharmazie*, 1987, **42**, 80.
7. T. Froehr, C. P. Sindlinger, U. Kloeckner, P. Finkbeiner and B. J. Nachtsheim, *Org. Lett.*, 2011, **13**, 3754.
8. R. Yella and B. K. Patel, *J. Comb. Chem.*, 2010, **12**, 754.
9. C. L. Cioffi, J. L. Lansing and H. Yüksel, *J. Org. Chem.*, 2010, **75**, 7942.
10. S. Wertz, S. Kodama and A. Studer, *Angew. Chem. Int. Ed.*, 2011, **50**, 11511.
11. Y. Li, J. Liu, Y. Xie, R. Zhang, K. Jin, X. Wang and C. Duan, *Org. Biomol. Chem.*, 2012, **10**, 3715.
12. G. Aridoss, S. Amirthaganesan and Y. T. Jeong, *Bio. Med. Chem.*, 2010, **20**, 2242.

## V. Copies of $^1\text{H}$ and $^{13}\text{C}$ Spectra of Products

C:\K.N. Singh,,I.T\PBA\_1H2.als  
PBA 1H Mr. A. Bharat Kumar

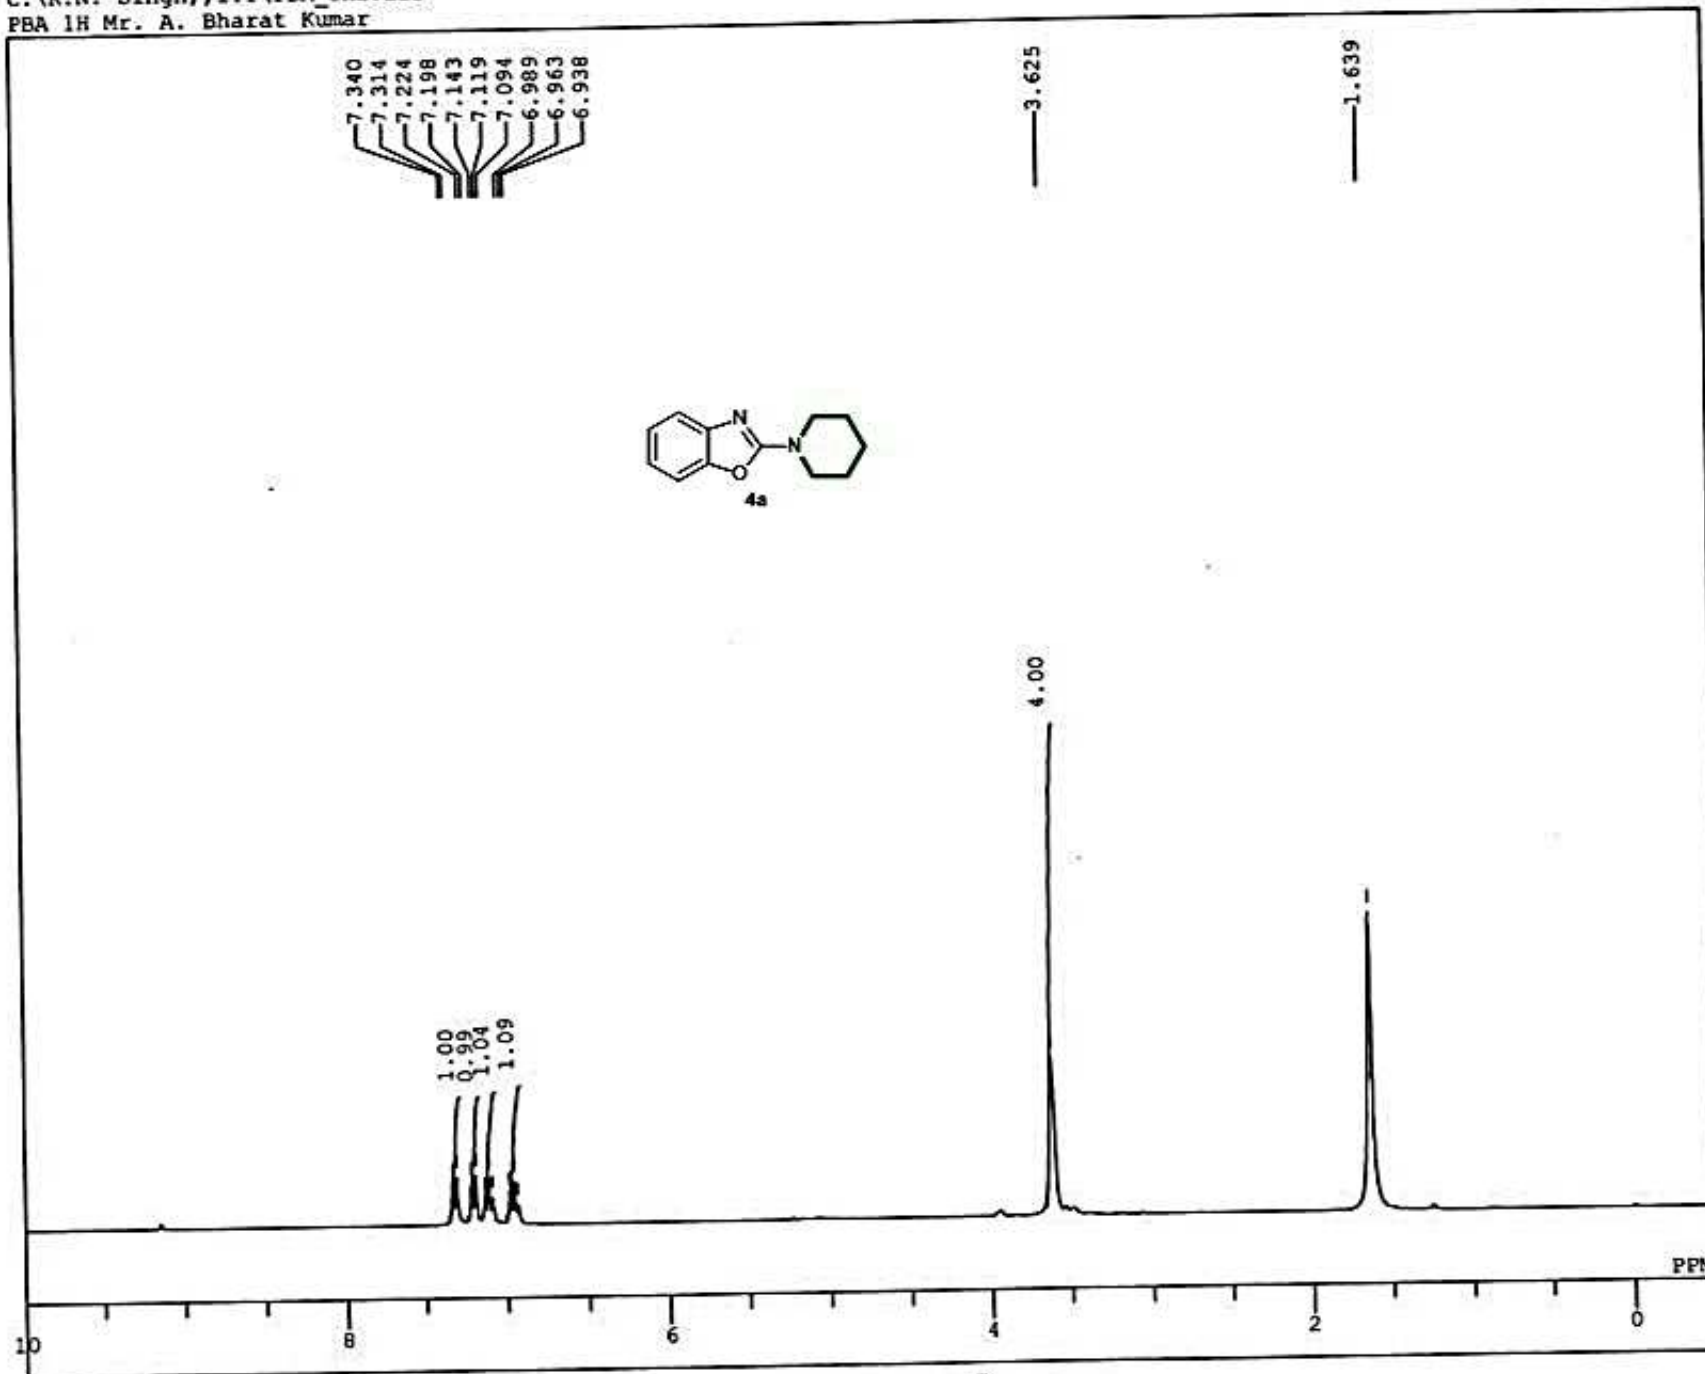

JEOL AL300 FTNMR  
CHEMISTRY DEPARTMENT  
Banaras Hindu University  
VARANASI-221005

Operator : Nagendra Kuma  
Shishir Singh

DFILE C:\K.N. Singh,,I.  
COMNT PBA 1H Mr. A. Bha  
DATIM Sat Jul 28 13:51:  
OBNUC 1H  
EXMOD NON  
OBFRQ 300.40 MHz  
OBSET 130.00 KHz  
OBFIN 1150.0 Hz  
POINT 32768  
FREQU 9505.7 Hz  
SCANS 16  
ACQTM 3.447 sec  
PD 1.547 sec  
PW1 5.2 us  
IRNUC 1H  
CTEMP 21.1 c  
SLVNT CDCL3  
EXREF 0.00 ppm  
BF 1.20 Hz  
RGAIN 7

C:\K.N. Singh,,I.T\PBA\_13C2.als  
PBA 13C Mr. A. Bharat Kumar

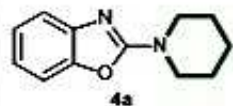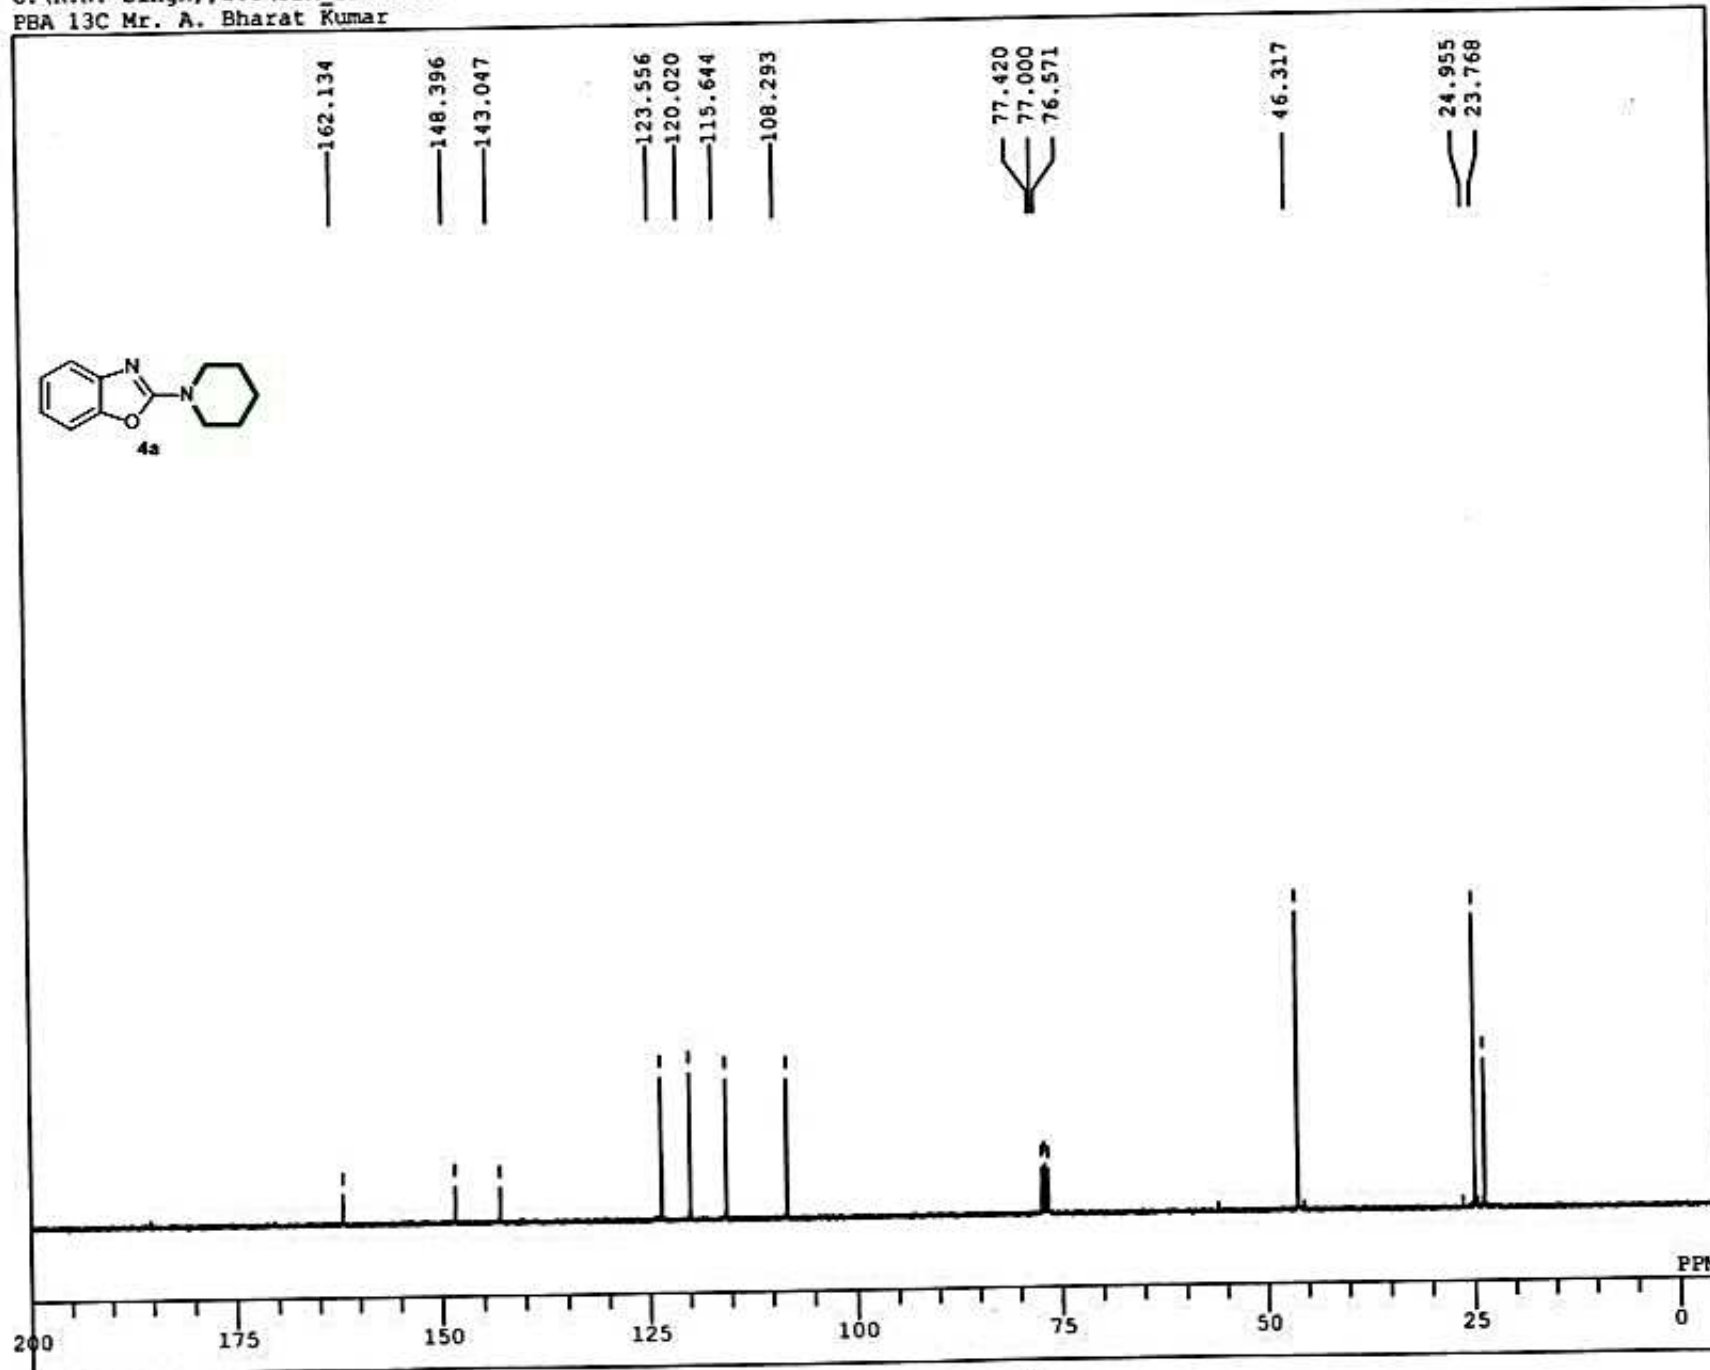

JEOL AL300 FTNMR  
CHEMISTRY DEPARTMENT  
Banaras Hindu University  
VARANASI-221005

Operator : Nagendra Kuma  
Shishir Singh

DFILE C:\K.N. Singh,,I.  
COMNT PBA\_13C Mr. A. Bh  
DATIM Sat Jul 28 13:46:  
OBNUC 13C  
EXMOD BCM  
OBFRQ 75.45 MHz  
OBSET 127.30 KHz  
OBFIN 44.7 Hz  
POINT 32768  
FREQU 20408.1 Hz  
SCANS 32  
ACQTM 1.606 sec  
PD 1.394 sec  
PW1 6.0 us  
IRNUC 1H  
CTEMP 21.7 c  
SLVNT CDCL3  
EXREF 77.00 ppm  
BF 1.20 Hz  
RGAIN 23

C:\K.N. Singh,,I.T\MRB\_1H.als  
MRB 1H Mr. G. Tirumaleswara Rao

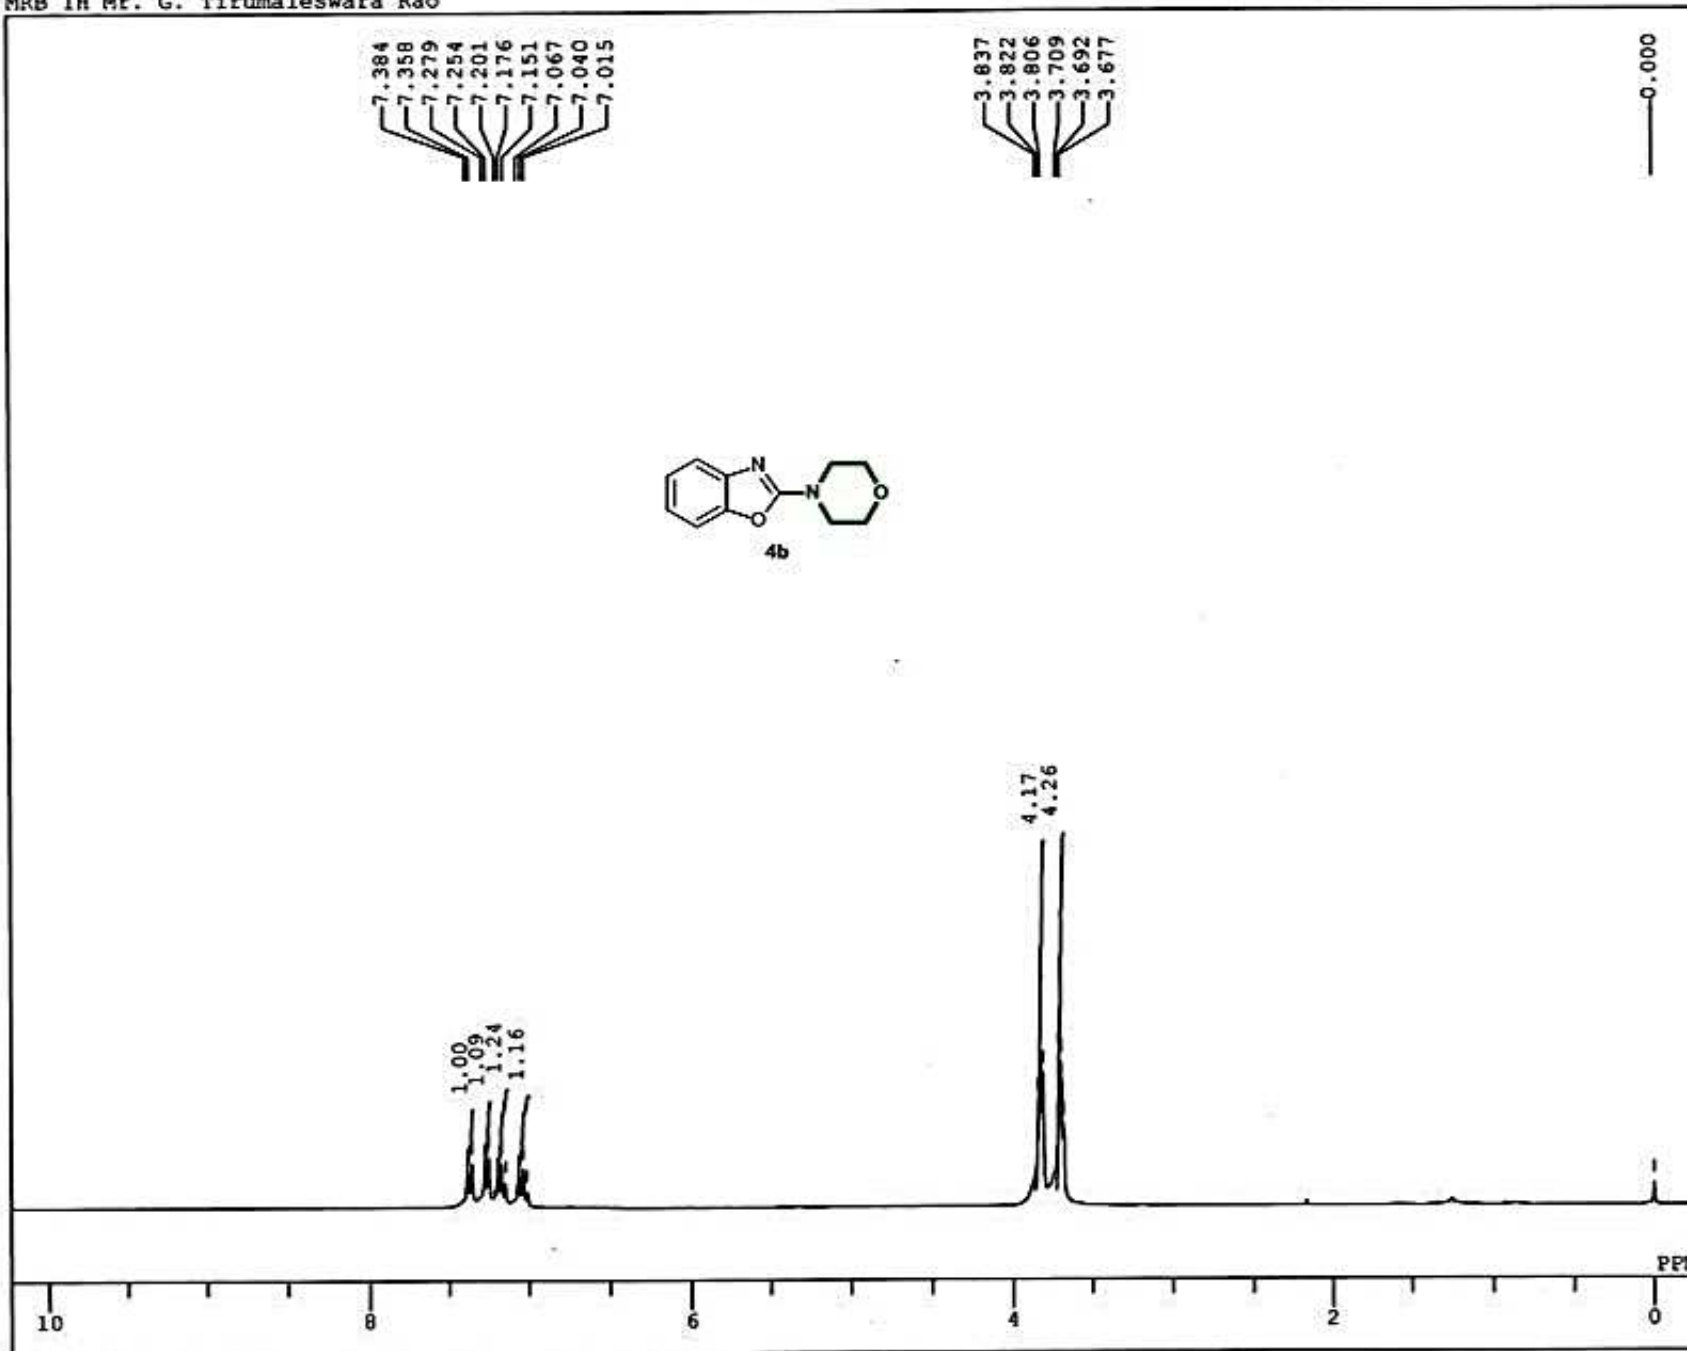

JEOL AL300 FTNMR  
CHEMISTRY DEPARTMENT  
Banaras Hindu University  
VARANASI-221005

Operator : Nagendra Kuma  
Shishir Singh

DFILE C:\K.N. Singh,,I.  
COMNT MRB\_1H Mr. G. Tir  
DATIM Mon Aug 27 14:22:  
OBNUC 1H  
EXMOD NON  
OBFREQ 300.40 MHz  
OBSET 130.00 KHz  
OBFIN 1150.0 Hz  
POINT 32768  
FREQU 6016.8 Hz  
SCANS 64  
ACQTM 5.446 sec  
PD 1.547 sec  
FW1 5.2 us  
IRNUC 1H  
CTEMP 21.1 c  
SLVNT CDCL3  
EXREF 0.00 ppm  
BF 1.20 Hz  
RGAIN 16

C:\K.N. Singh,,I.T\MRB\_13C.als  
MRB 1H Mr. A. Bharat Kumar

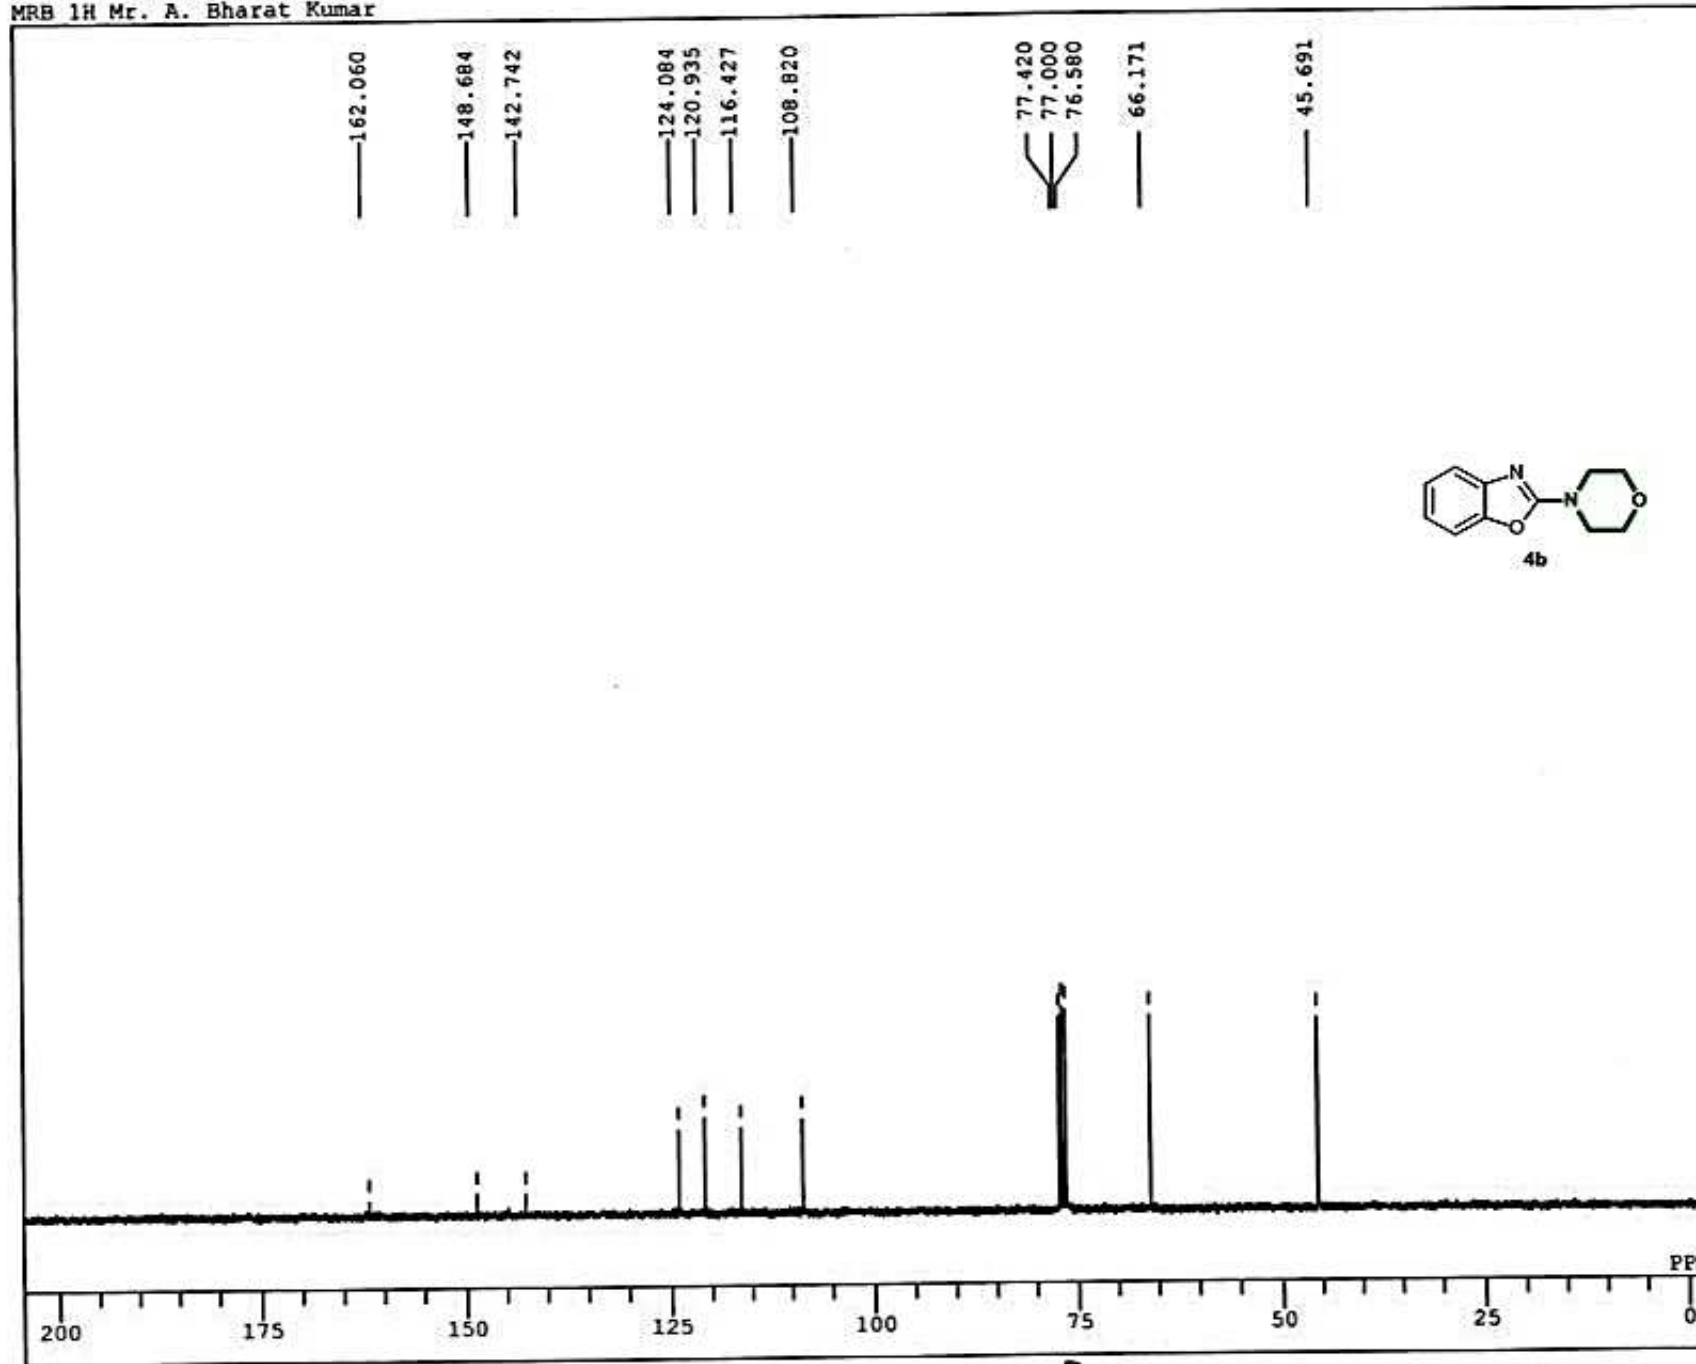

JEOL AL300 FTNMR  
CHEMISTRY DEPARTMENT  
Banaras Hindu University  
VARANASI-221005

Operator : Nagendra Kuma  
Shishir Singh

DFILE C:\K.N. Singh,,I.'  
COMNT MRB\_1H Mr. A. Bha  
DATIM Wed Sep 19 15:22:  
OBNUC 13C  
EXMOD BCM  
OBFRQ 75.45 MHz  
OBSET 127.30 KHz  
OBFIN 44.7 Hz  
POINT 32768  
FREQU 20408.1 Hz  
SCANS 200  
ACQTM 1.606 sec  
PD 1.394 sec  
PWI 6.0 us  
IRNUC 1H  
CTEMP 20.2 c  
SLVNT CDCL3  
EXREF 77.00 ppm  
BF 1.20 Hz  
RGAIN 25



C:\K.N. Singh,,I.T\OC-01\_1H.als  
OC-01 1H Mr.A.Bharat Kumar

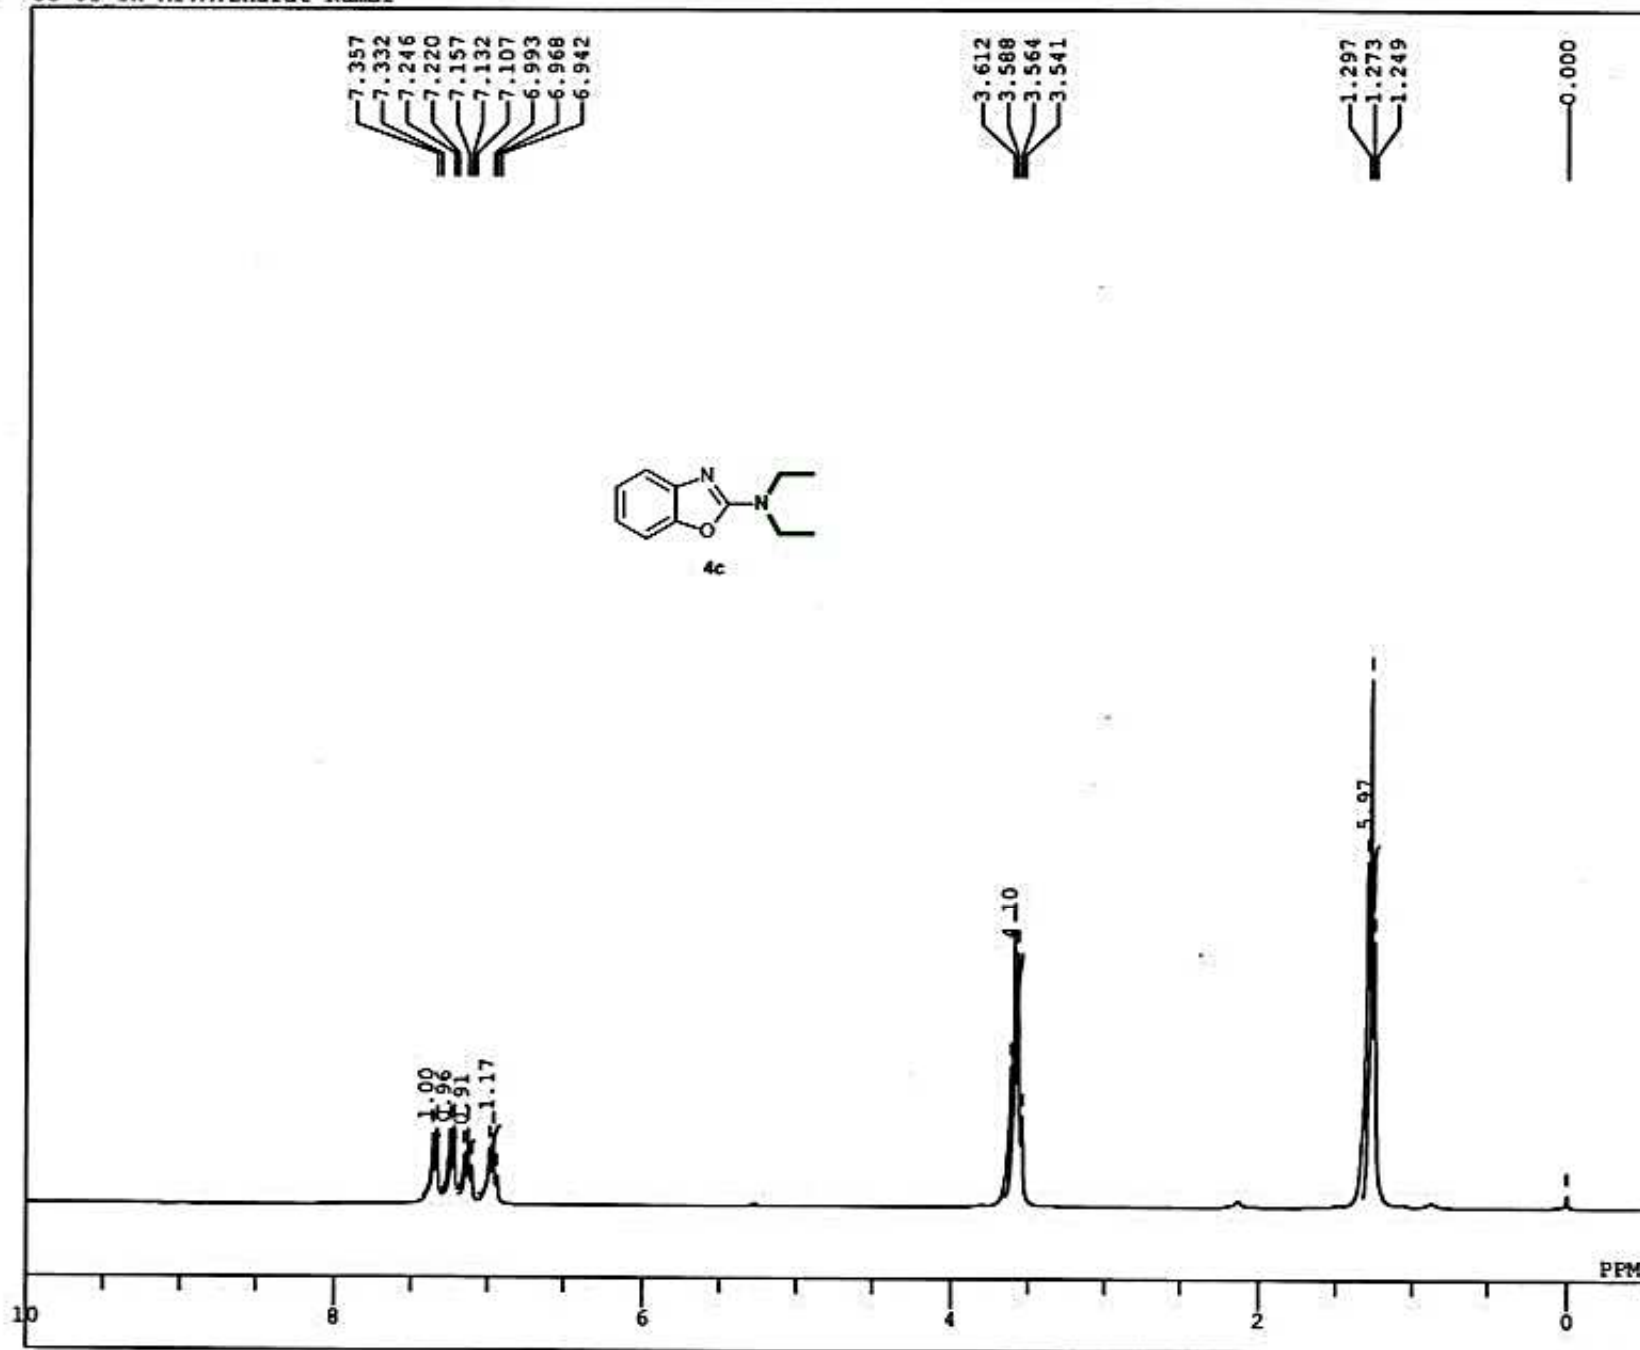

JEOL AL300 FTNMR  
CHEMISTRY DEPARTMENT  
Banaras Hindu University,  
VARANASI-221005

Operator : Nagendra Kumar  
Shishir Singh

DFILE C:\K.N. Singh,,I.T\OC-01\_1H Mr.A.Bharat Kumar  
COMNT OC-01\_1H Mr.A.Bharat Kumar  
DATIM Sat Jun 16 12:47:27 2013  
OBNUC 1H  
EXMOD NON  
OBFRQ 300.40 MHz  
OBSET 130.00 KHz  
OBFIN 1150.0 Hz  
POINT 32768  
FREQU 6016.8 Hz  
SCANS 32  
ACQTM 5.446 sec  
PD 1.547 sec  
PW1 5.2 us  
IRNUC 1H  
CTEMP 21.5 c  
SLVNT CDCL3  
EXREF 0.00 ppm  
BF 1.20 Hz  
RGAIN 11

C:\K.N. Singh,,I.T\OC-01\_13C.als  
OC-01 13C Mr.A.Bharat Kumar

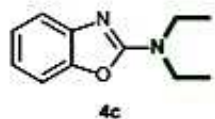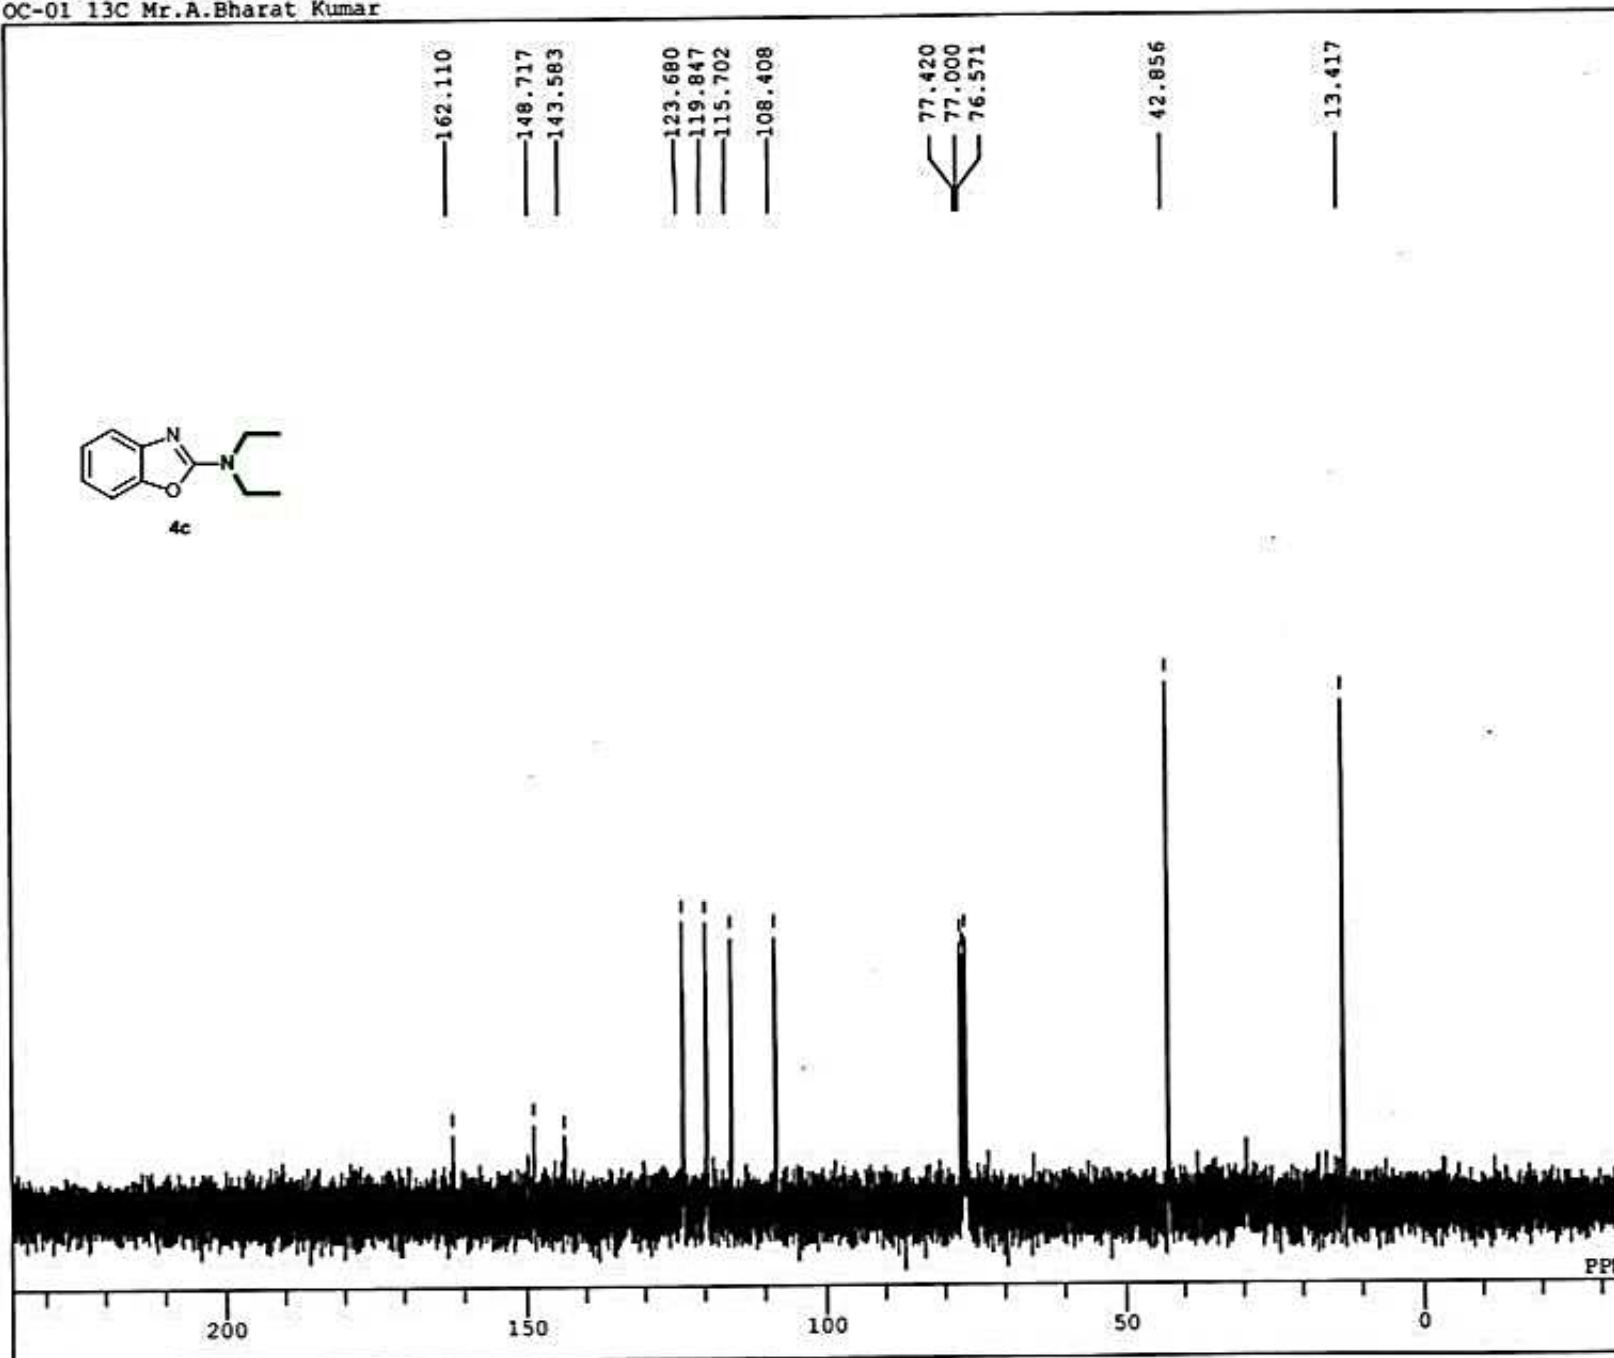

JEOL AL300 FTNMR  
CHEMISTRY DEPARTMENT  
Banaras Hindu University,  
VARANASI-221005

Operator : Nagendra Kumar  
Shishir Singh

DFILE C:\K.N. Singh,,I.T\OC-01\_13C.als  
COMNT OC-01\_13C Mr.A.Bharat Kumar  
DATIM Sat Jul 07 11:44:50 2013  
OBNUC 13C  
EXMOD BCM  
OBFRQ 75.45 MHz  
OBSET 127.30 KHz  
OBFIN 44.7 Hz  
POINT 32768  
FREQU 20408.1 Hz  
SCANS 415  
ACQTM 1.606 sec  
PD 1.394 sec  
PW1 6.0 us  
IRNUC 1H  
CTEMP 20.2 c  
SLVNT CDCL3  
EXREF 77.00 ppm  
BF 0.12 Hz  
RGAIN 25

C:\K.N. Singh,,I.T\NMBA\_1H.als  
NMBA 1H Mr. A. Bharat Kumar

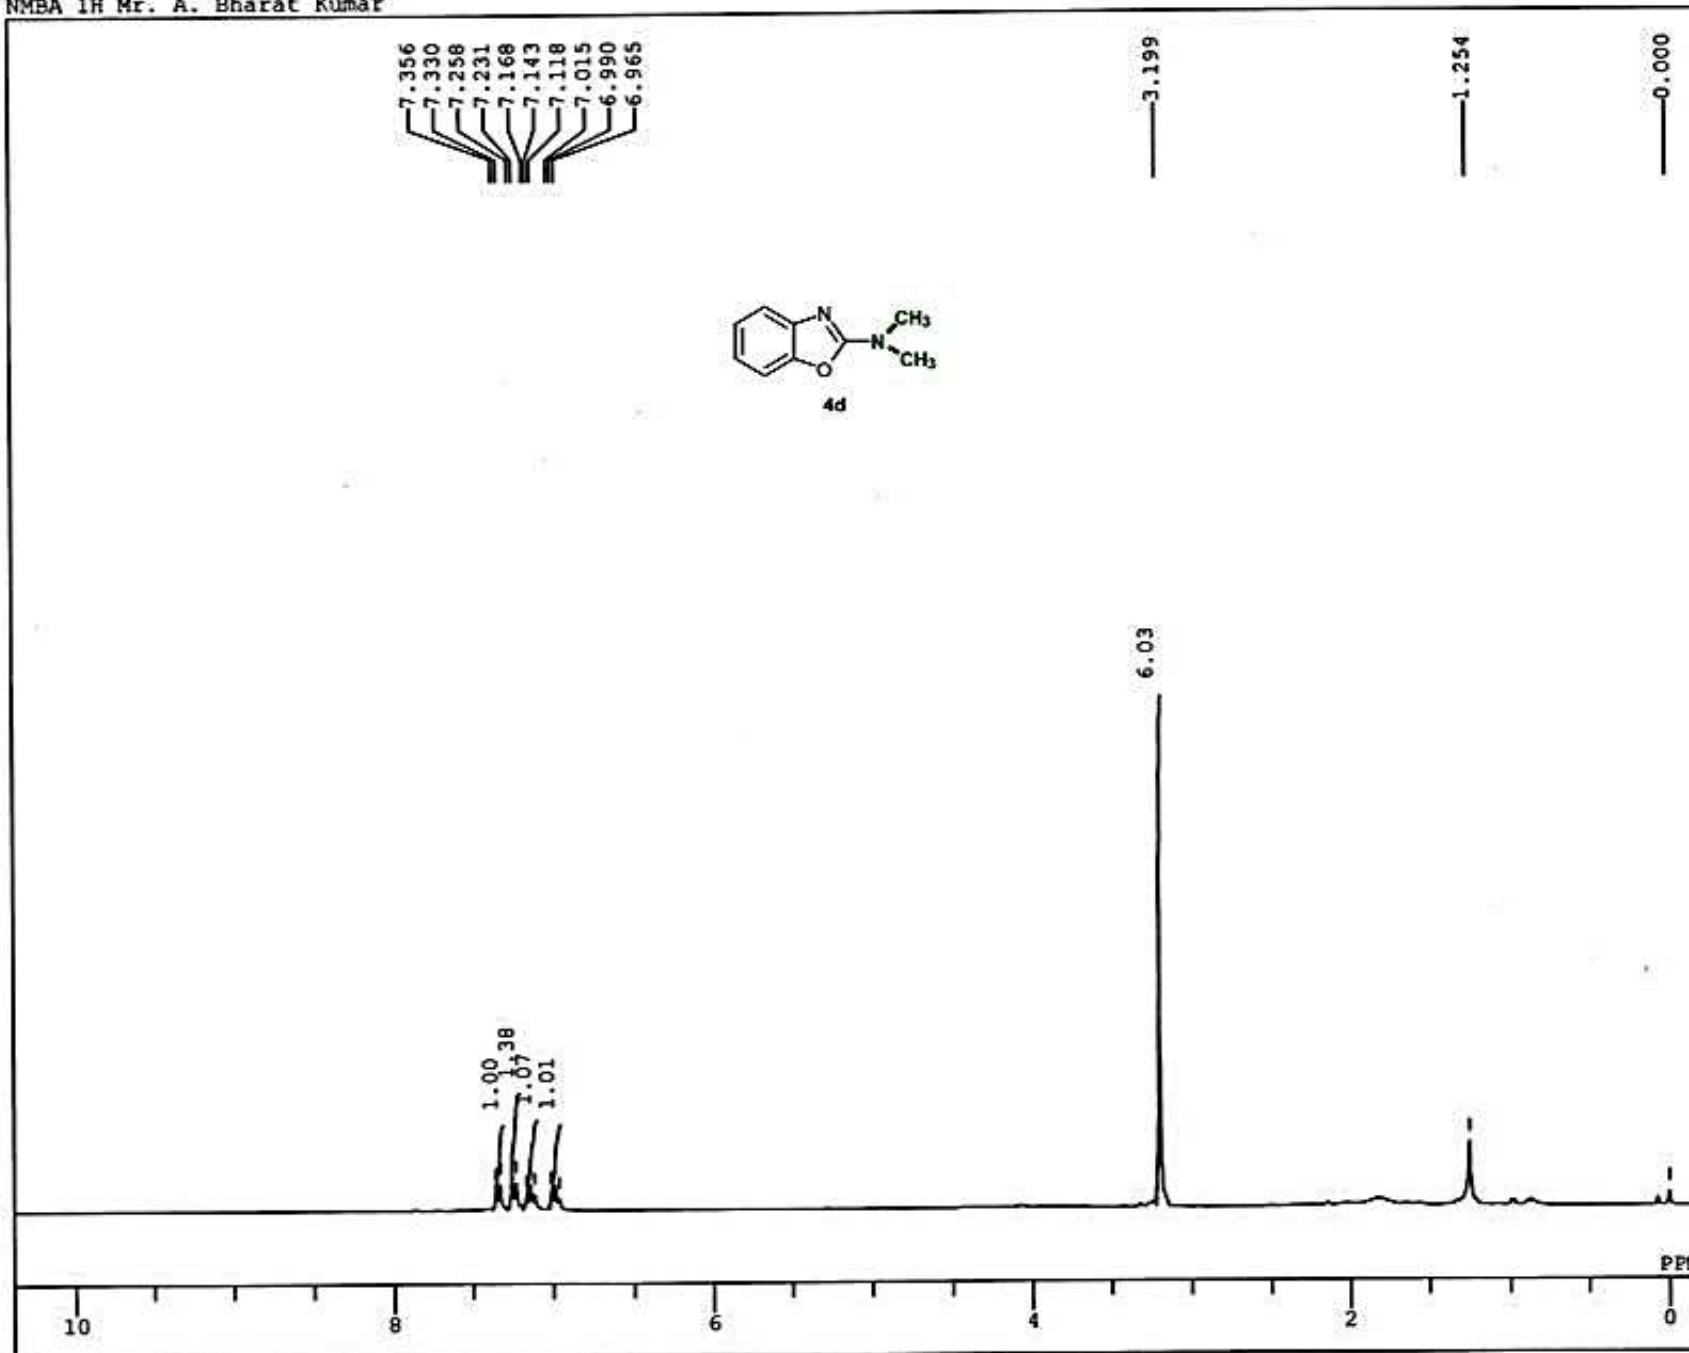

JEOL AL300 FTNMR  
CHEMISTRY DEPARTMENT  
Banaras Hindu University  
VARANASI-221005

Operator : Nagendra Kuma  
Shishir Singh

DFILE C:\K.N. Singh,,I.  
COMNT NMBA\_1H Mr. A. Bh.  
DATIM Fri Aug 03 13:24:  
OBNUC 1H  
EXMOD NON  
OBFRQ 300.40 MHz  
OBSET 130.00 KHz  
OBFIN 1150.0 Hz  
POINT 32768  
FREQU 9505.7 Hz  
SCANS 16  
ACQTM 3.447 sec  
PD 1.547 sec  
PWI 5.2 us  
IRNUC 1H  
CTEMP 20.5 c  
SLVNT CDCL3  
EXREF 0.00 ppm  
BF 1.20 Hz  
RGAIN 16

C:\K.N. Singh,,I.T\NMBA 13C.als  
NMBA 13C Mr. A. Bharat Kumar

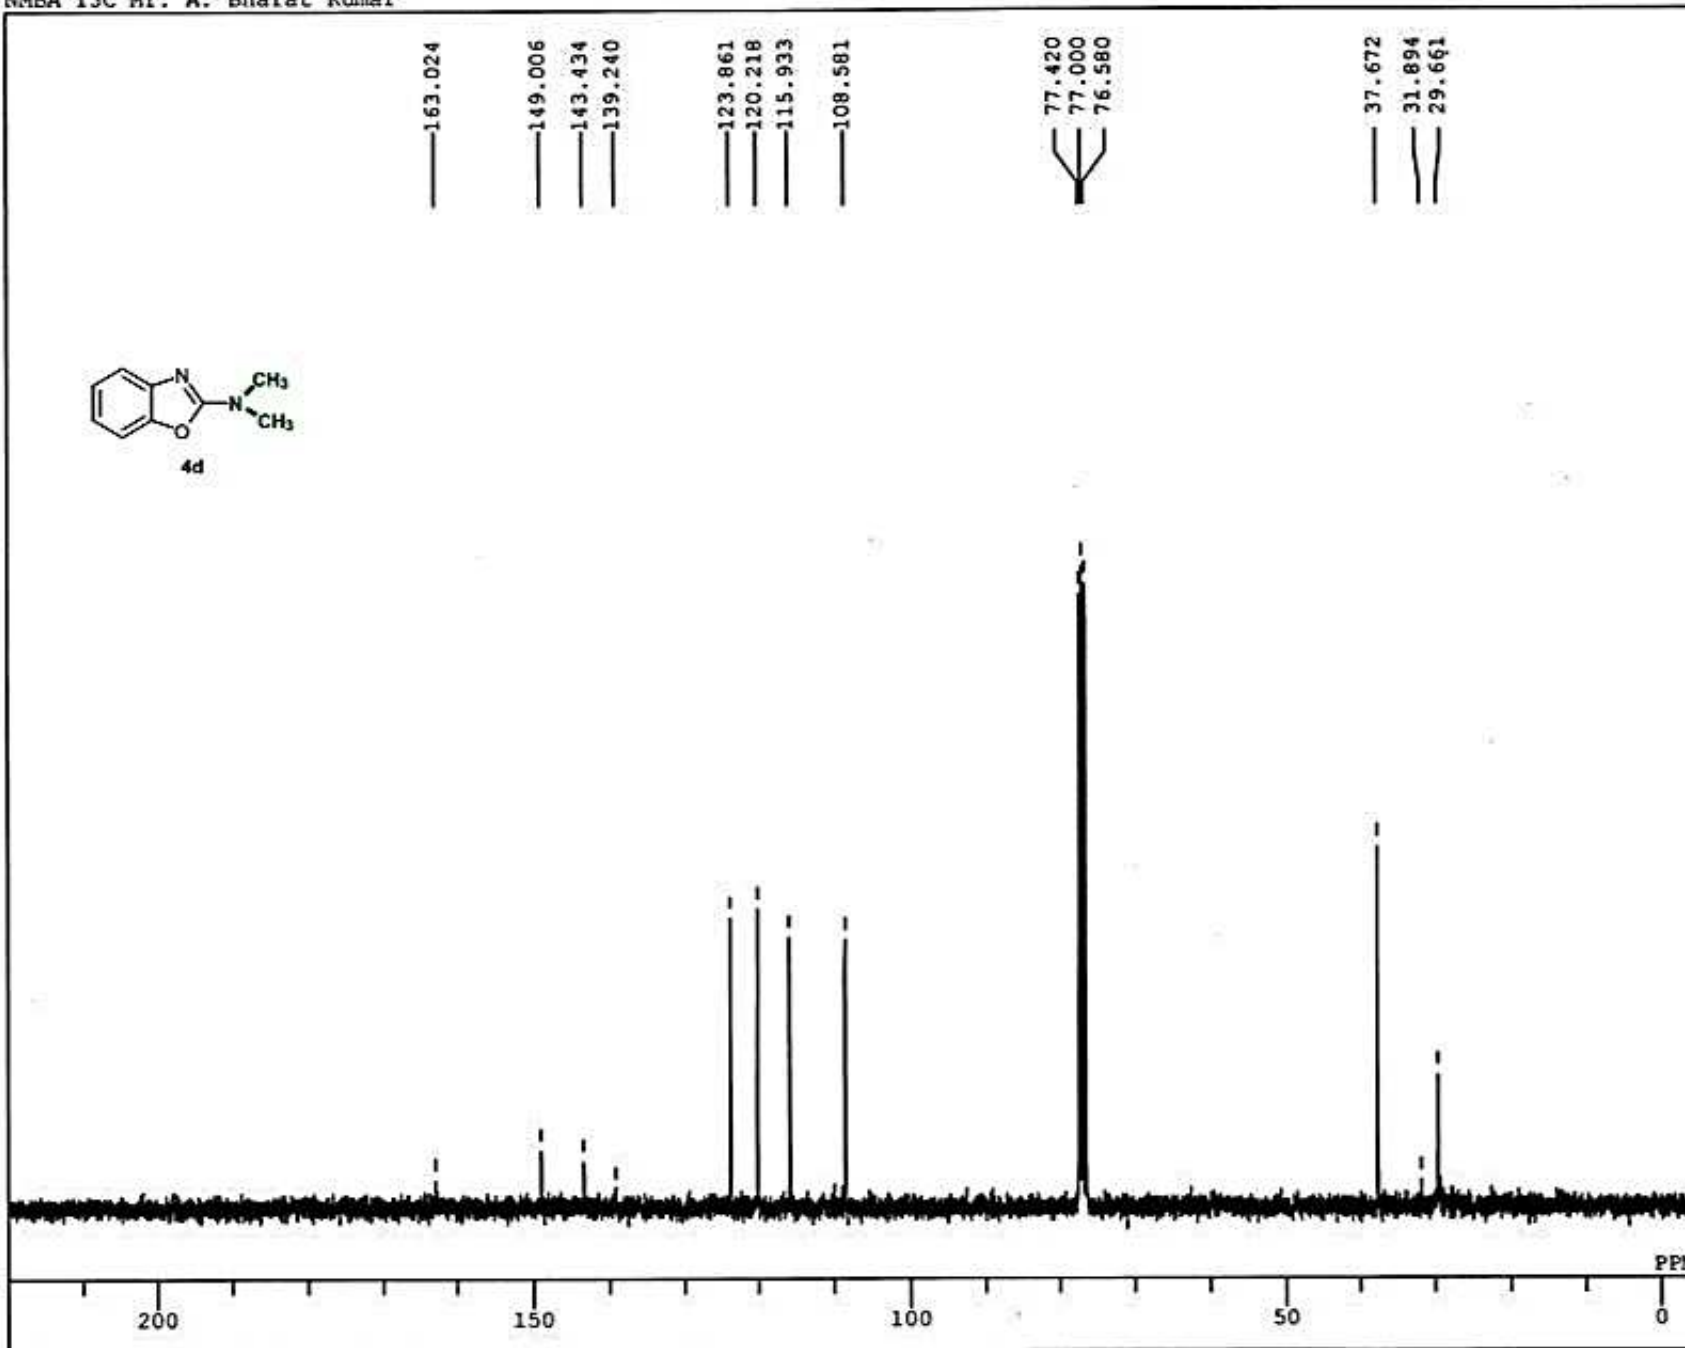

JEOL AL300 FTNMR  
CHEMISTRY DEPARTMENT  
Banaras Hindu University  
VARANASI-221005

Operator : Nagendra Kuma  
Shishir Singh

DFILE C:\K.N. Singh,,I.  
COMNT NMBA 13C Mr. A. B  
DATIM Mon Aug 06 16:58:  
OBNUC 13C  
EXMOD BCM  
OBFRQ 75.45 MHz  
OBSET 127.30 KHz  
OBFIN 44.7 Hz  
POINT 32768  
FREQU 20408.1 Hz  
SCANS 481  
ACQTM 1.606 sec  
PD 1.394 sec  
PW1 6.0 us  
IRNUC 1H  
CTEMP 21.9 c  
SLVNT CDCL3  
EXREF 77.00 ppm  
BF 1.20 Hz  
RGAIN 25

C:\K.N. Singh,,I.T\NBEA\_1H.als  
NBEA 1H Mr. G. Tirumaleswar Rao

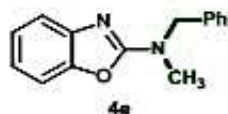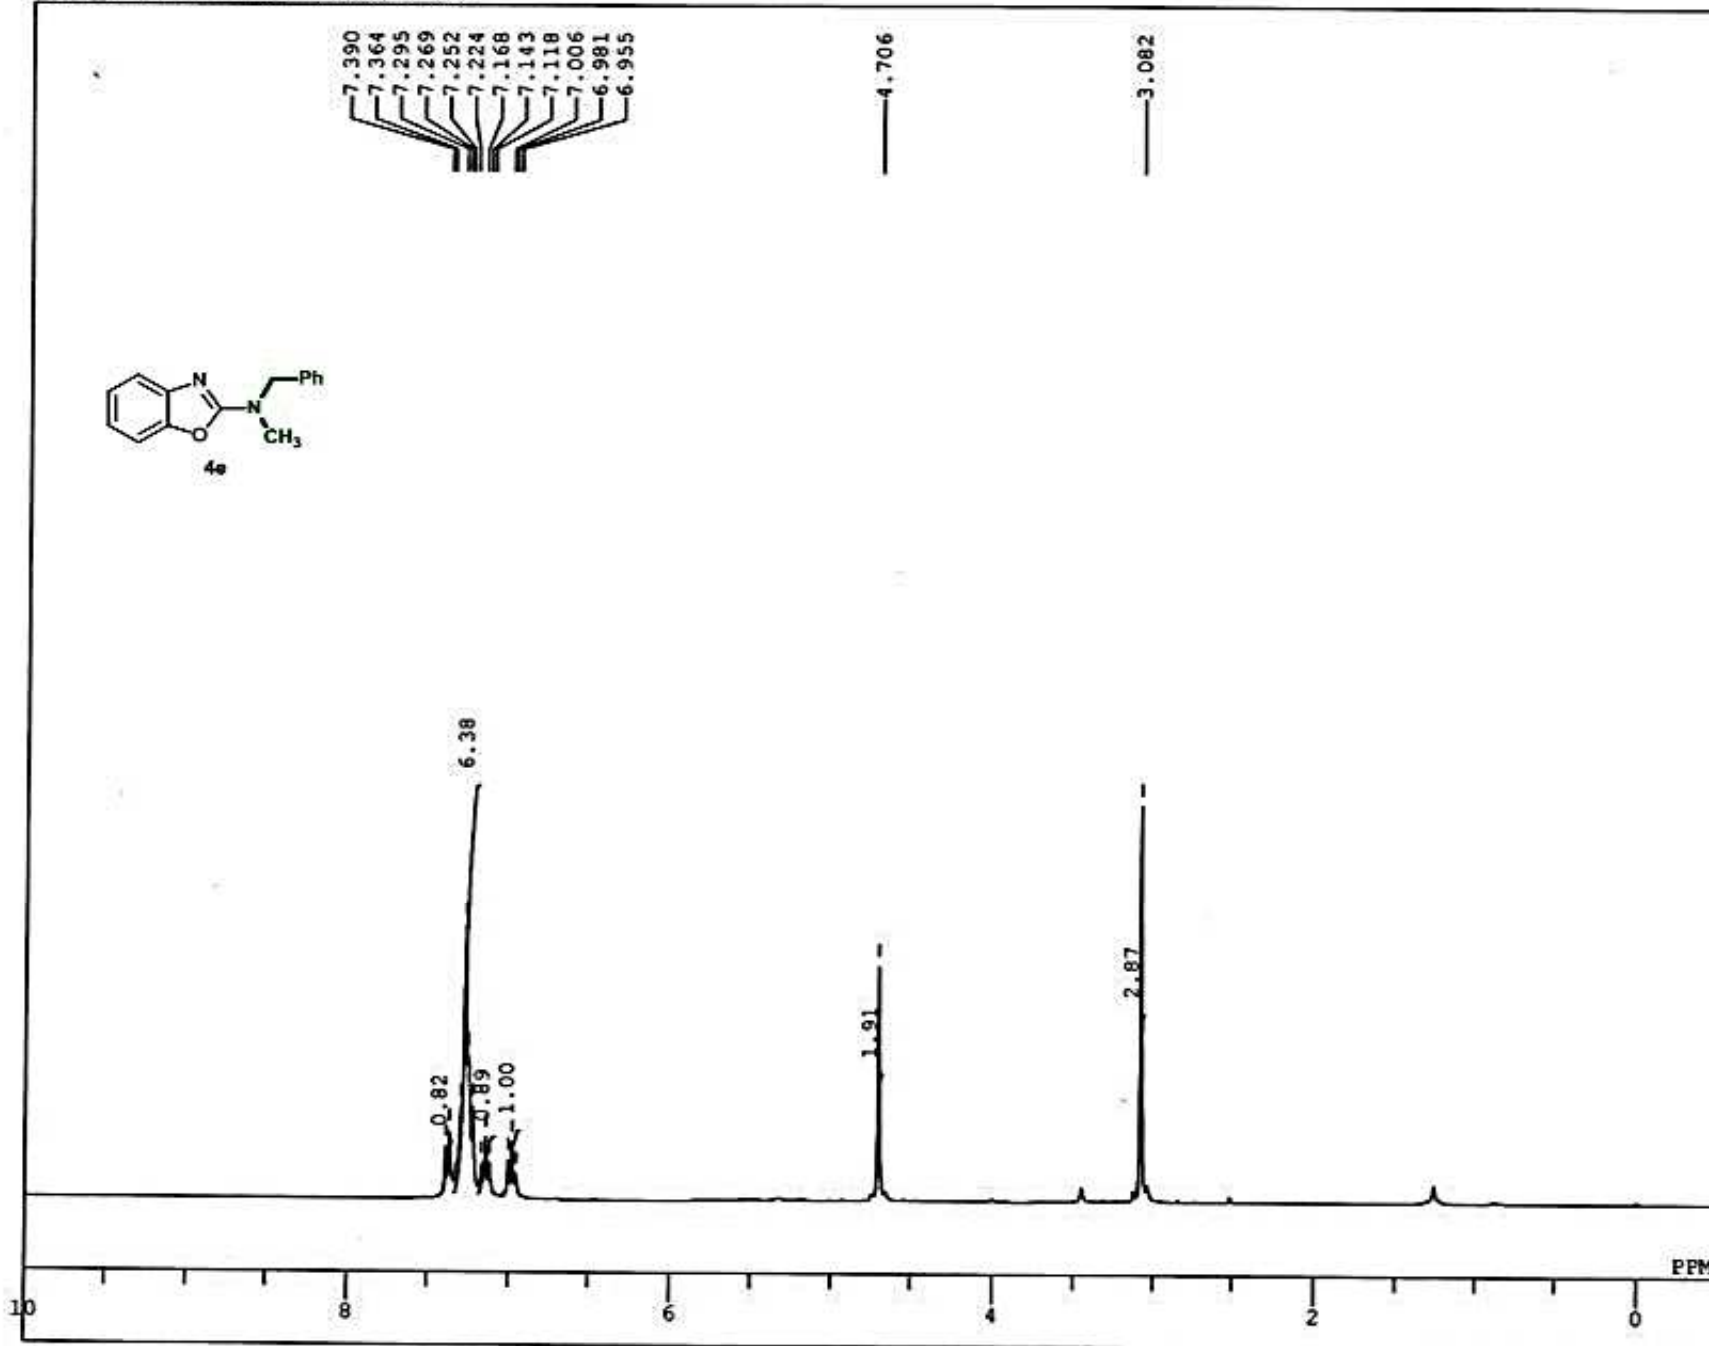

JEOL AL300 FTNMR  
CHEMISTRY DEPARTMENT  
Banaras Hindu University  
VARANASI-221005

Operator : Nagendra Kuma  
Shishir Singh

DFILE C:\K.N. Singh,,I.  
COMNT NBEA\_1H Mr. G. Ti  
DATIM Mon Oct 08 12:49:  
OBNUC 1H  
EXMOD NON  
OBFRQ 300.40 MHz  
OBSET 130.00 KHz  
OBFIN 1150.0 Hz  
POINT 32768  
FREQU 9505.7 Hz  
SCANS 50  
ACQTM 3.447 sec  
PD 1.547 sec  
PW1 5.2 us  
IRNUC 1H  
CTEMP 20.2 c  
SLVNT CDCL3  
EXREF 0.00 ppm  
BF 1.20 Hz  
RGAIN 8

C:\K.N. Singh,,I.T\NBEA\_13C.als  
NBEA 13C Mr. G. Tirumaleswar Rao

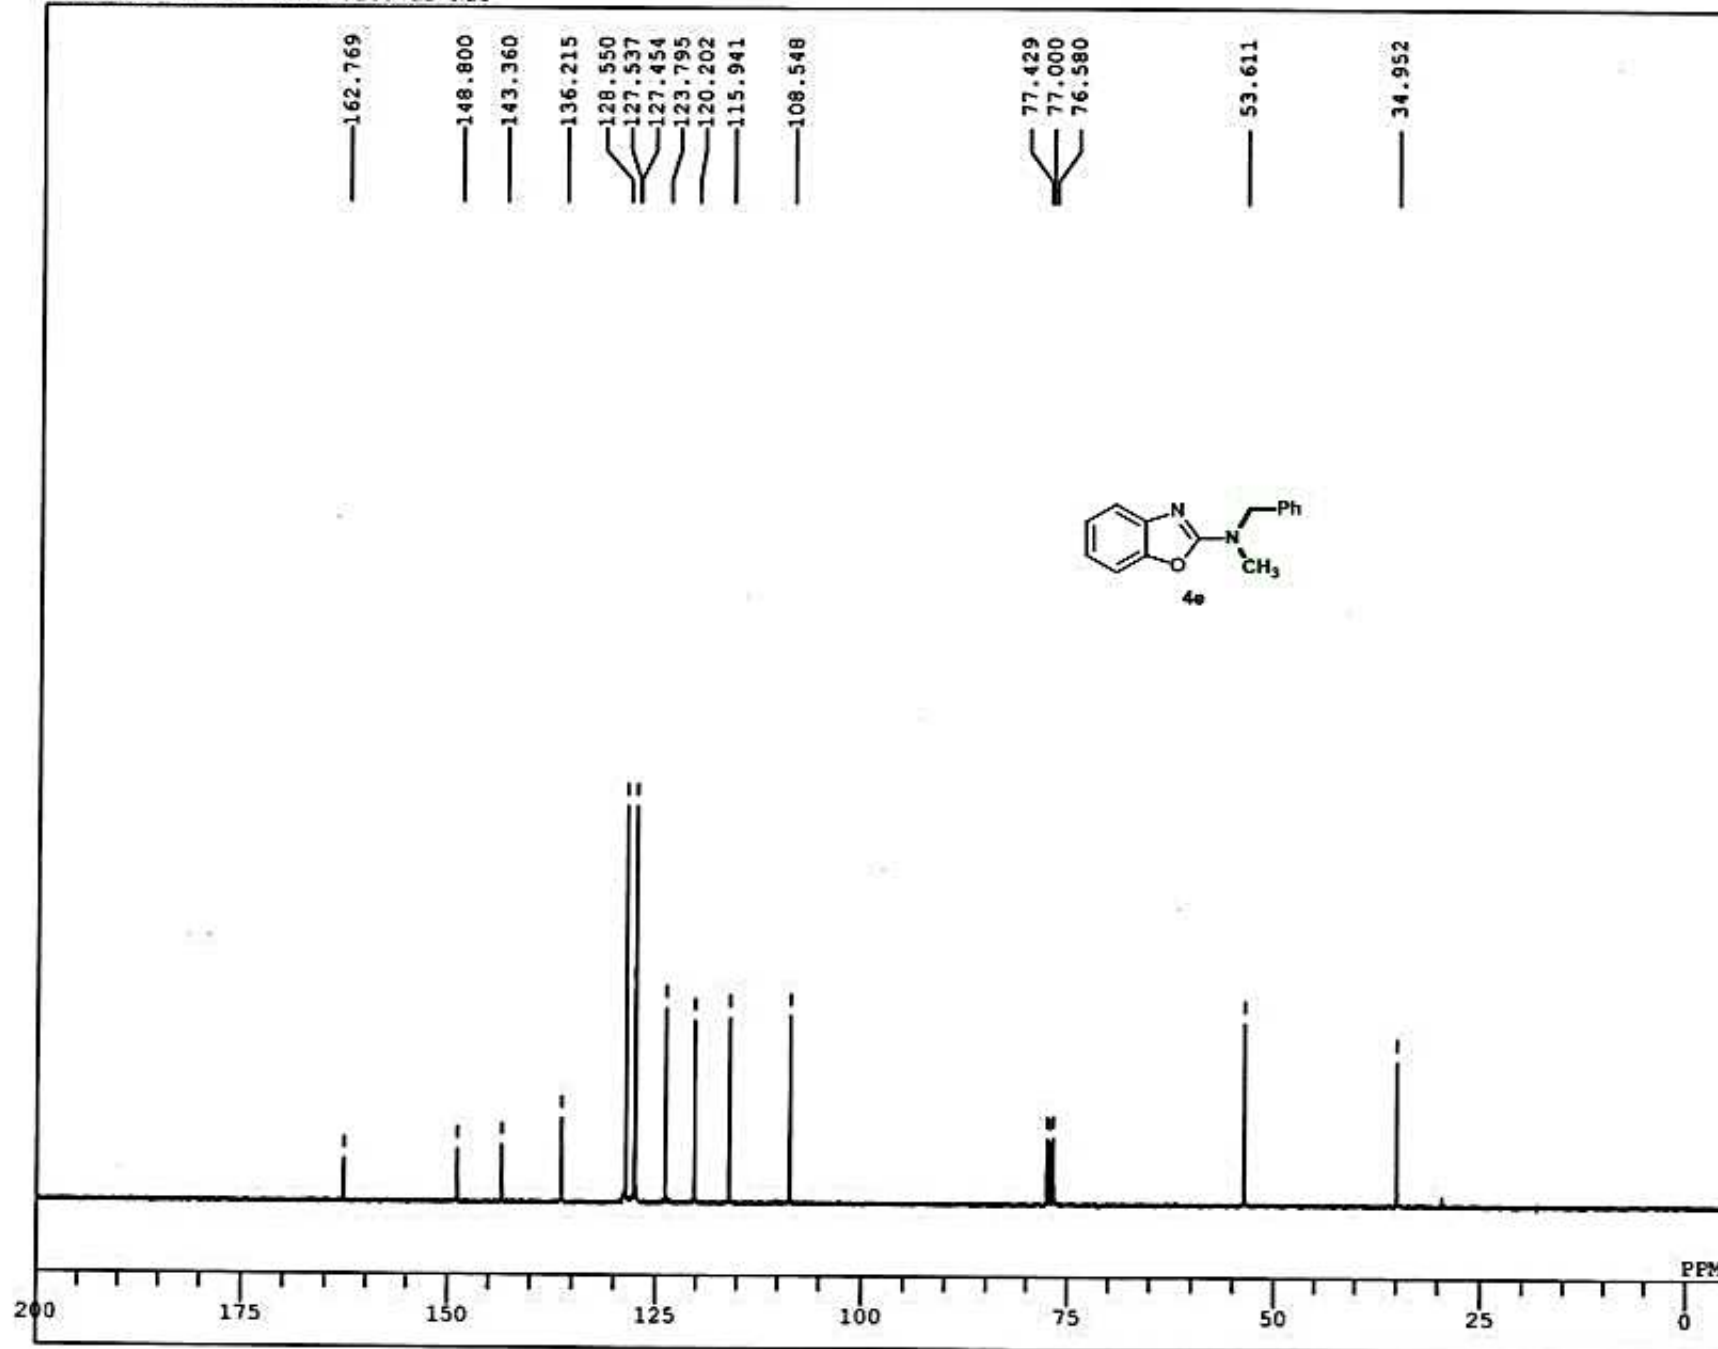

JEOL AL300 FTNMR  
CHEMISTRY DEPARTMENT  
Banaras Hindu University  
VARANASI-221005

Operator : Nagendra Kuma  
Shishir Singh

DFILE C:\K.N. Singh,,I.  
COMNT NBEA 13C Mr. G. T  
DATIM Mon Oct 08 12:58:  
OBNUC 13C  
EXMOD BCM  
OBFRQ 75.45 MHz  
OBSET 127.30 KHz  
OBFIN 44.7 Hz  
POINT 32768  
FREQU 20408.1 Hz  
SCANS 117  
ACQTM 1.606 sec  
PD 1.394 sec  
PW1 6.0 us  
IRNUC 1H  
CTEMP 23.9 c  
SLVNT CDCL3  
EXREF 77.00 ppm  
BF 1.20 Hz  
RGAIN 23



C:\K.N. Singh,,I.T\HXB\_1H.als  
HXB 1H Mr. Allam Bharat Kumar

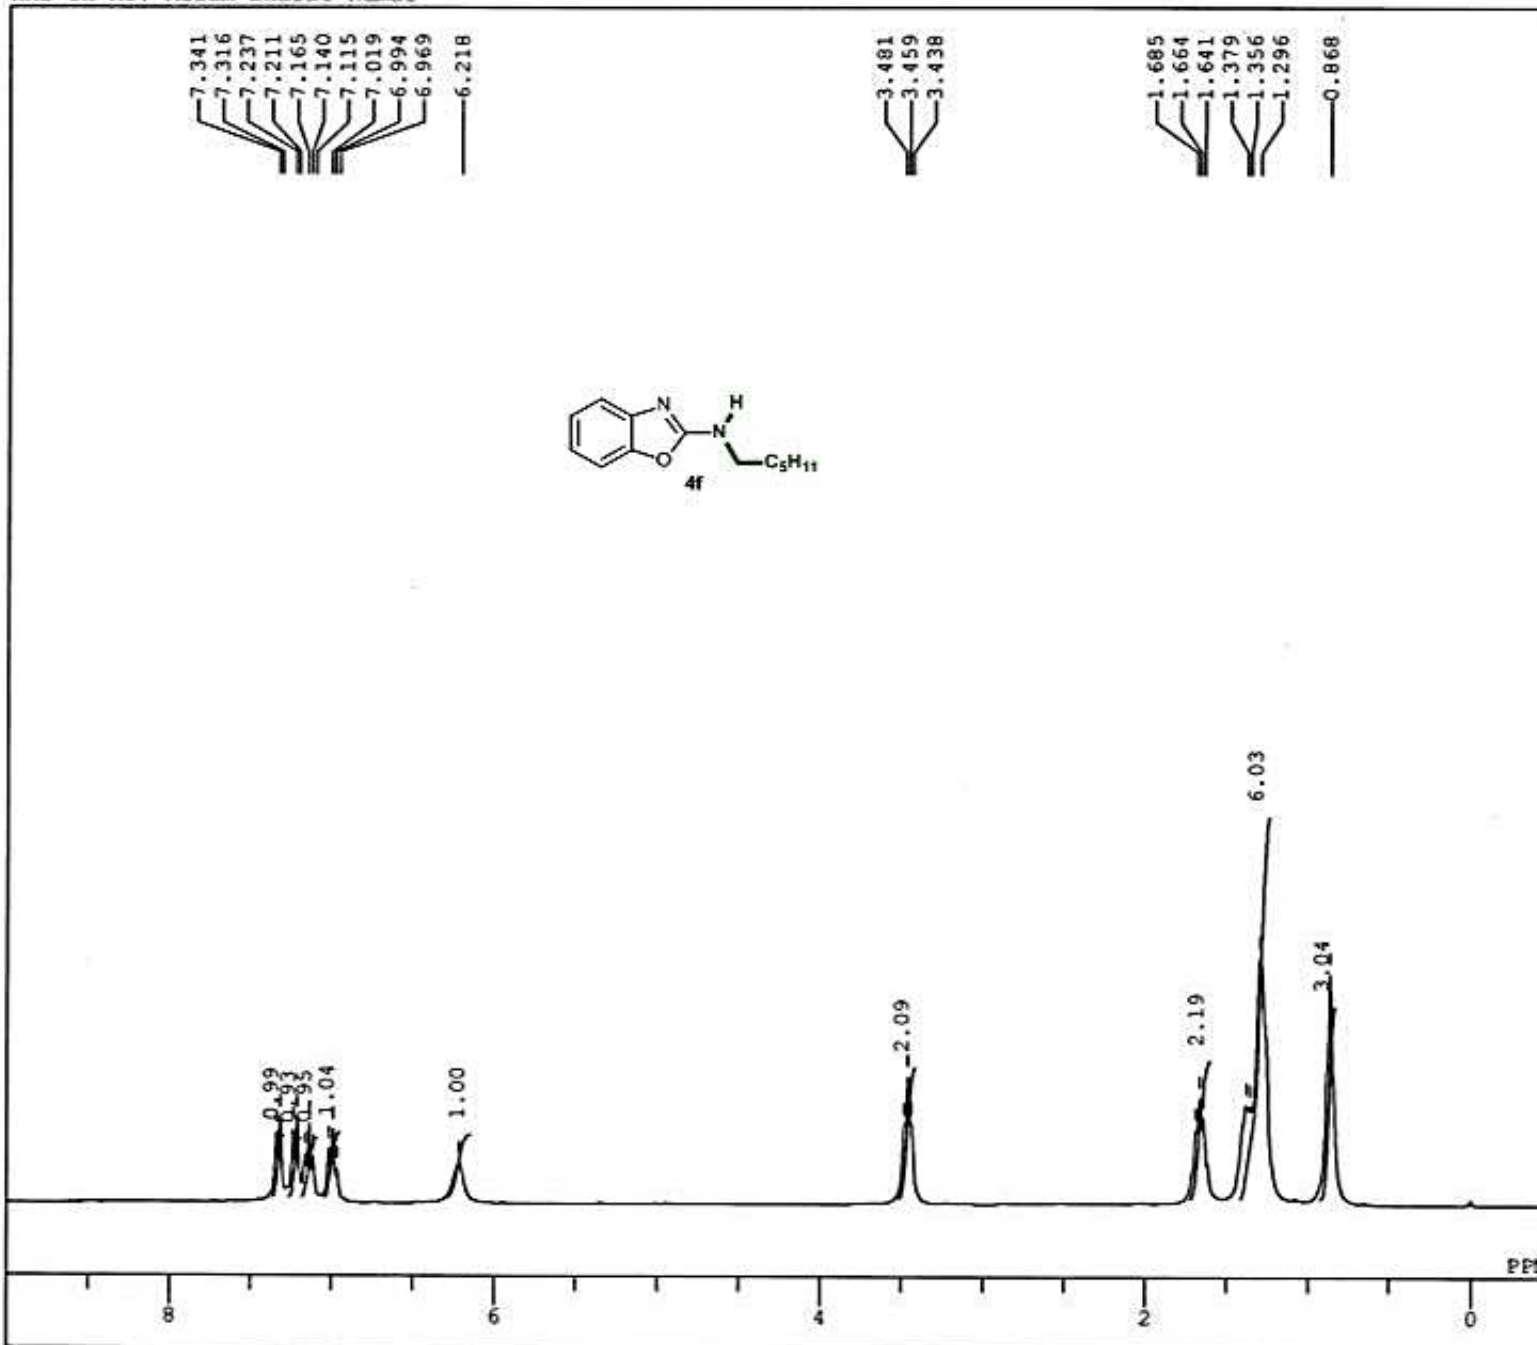

JEOL AL300 FTNMR  
CHEMISTRY DEPARTMENT  
Banaras Hindu University,  
VARANASI-221005

Operator : Nagendra Kumar  
Shishir Singh

DFILE C:\K.N. Singh,,I.T\HXB\_1H.als  
COMNT HXB\_1H\_Mr. Allam Bharat Kumar  
DATIM Wed Sep 26 12:51:56 2012  
OBNUC 1H  
EXMOD NON  
OBFRQ 300.40 MHz  
OBSET 130.00 KHz  
OBFIN 1150.0 Hz  
POINT 32768  
FREQU 9505.7 Hz  
SCANS 33  
ACQTM 3.447 sec  
PD 1.547 sec  
PWL 5.2 us  
IRNUC 1H  
CTEMP 19.7 c  
SLVNT CDCL3  
EXREF 0.00 ppm  
BF 1.22 Hz  
RGAIN 8

C:\WINNMR98\COMMON\DEFAULT.ALS  
HXB 13C Mr. Allam Bharat Kumar

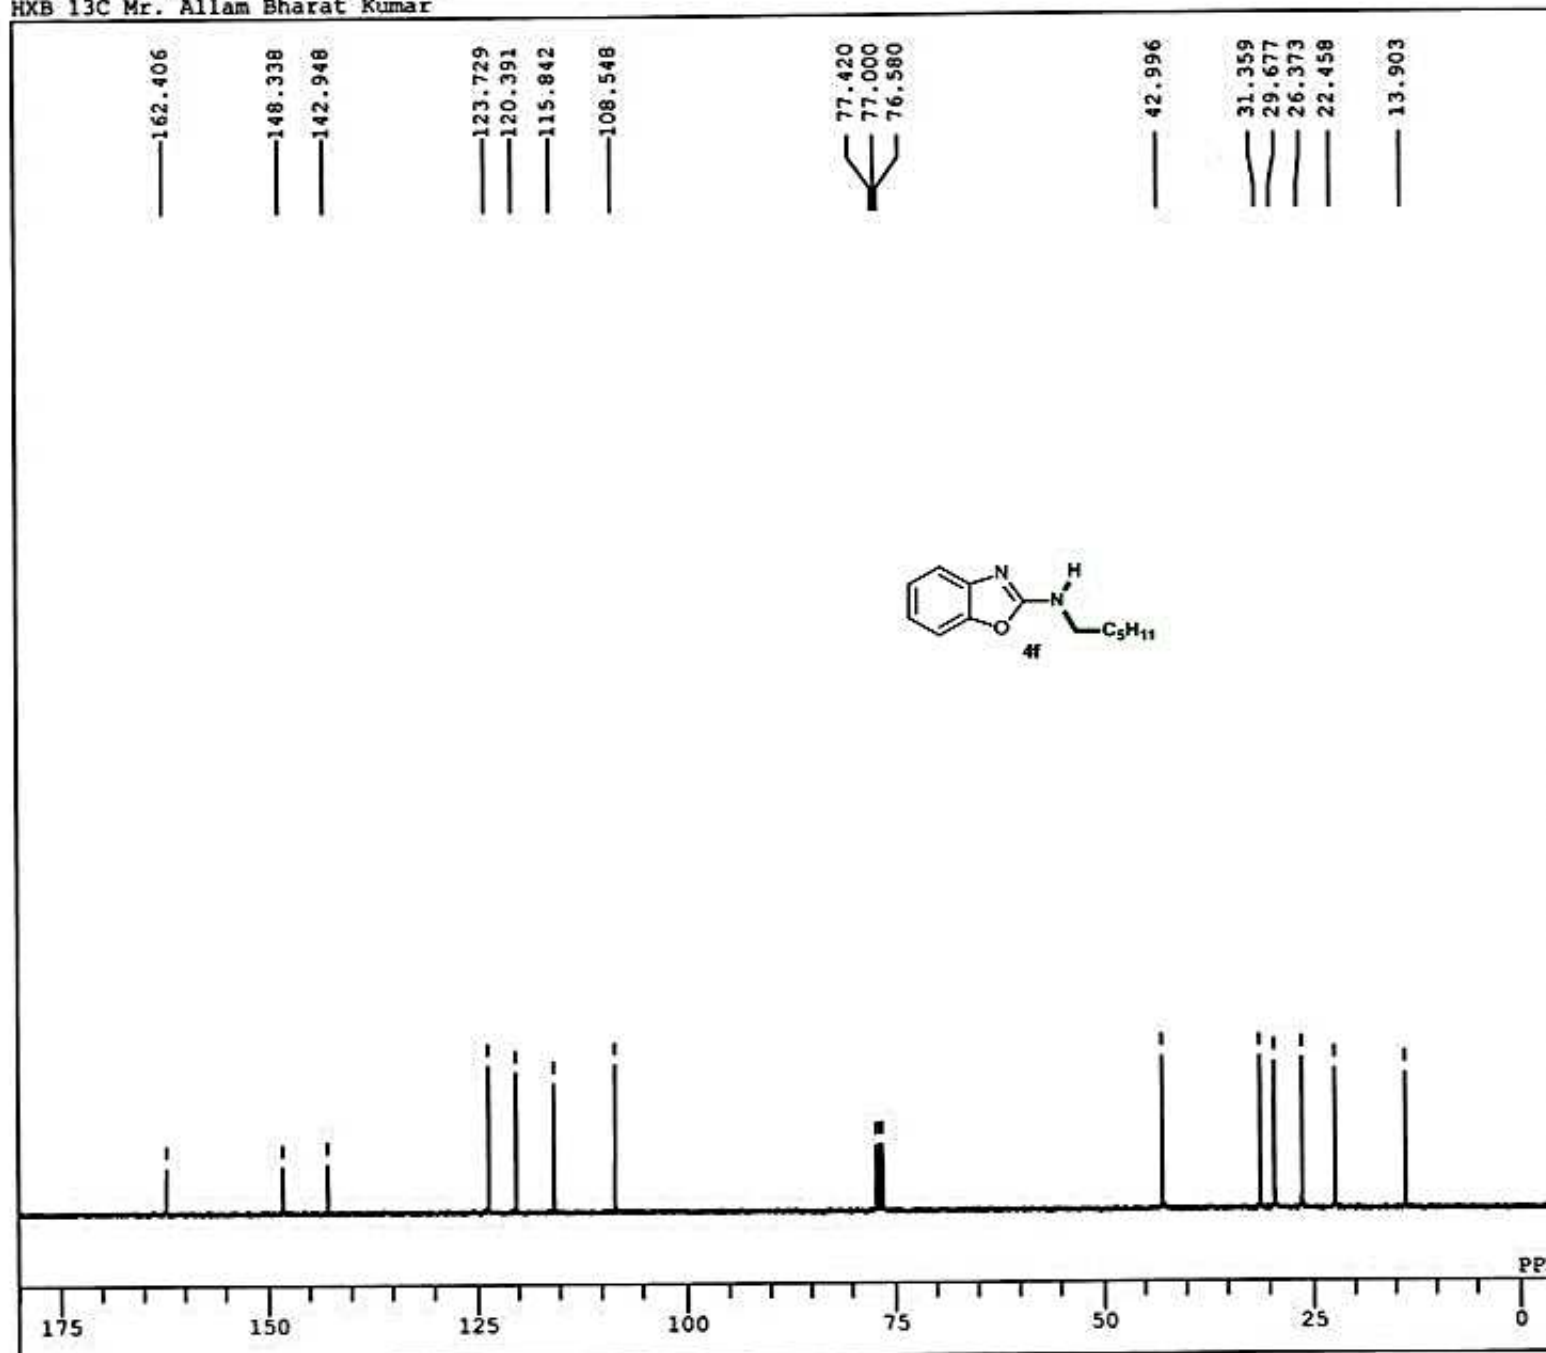

JEOL AL300 FTNMR  
CHEMISTRY DEPARTMENT  
Banaras Hindu University,  
VARANASI-221005

Operator : Nagendra Kumar  
Shishir Singh

DFILE C:\WINNMR98\COMMON\DEFAULT.  
COMNT HXB 13C Mr. Allam Bharat Kum  
DATIM Wed Sep 26 13:04:20 2012  
OBNUC 13C  
EXMOD BCM  
OBFRQ 75.45 MHz  
OBSET 127.30 KHz  
OBFIN 44.7 Hz  
POINT 32768  
FREQU 20408.1 Hz  
SCANS 111  
ACQTM 1.606 sec  
PD 1.394 sec  
PW1 6.0 us  
IRNUC 1H  
CTEMP 23.4 c  
SLVNT CDCL3  
EXREF 77.00 ppm  
BF 1.22 Hz  
RGAIN 25



C:\K.N. Singh,, I.T\NBX\_1H2.als  
NBX 13C Mr. G. Tirumaleshwer

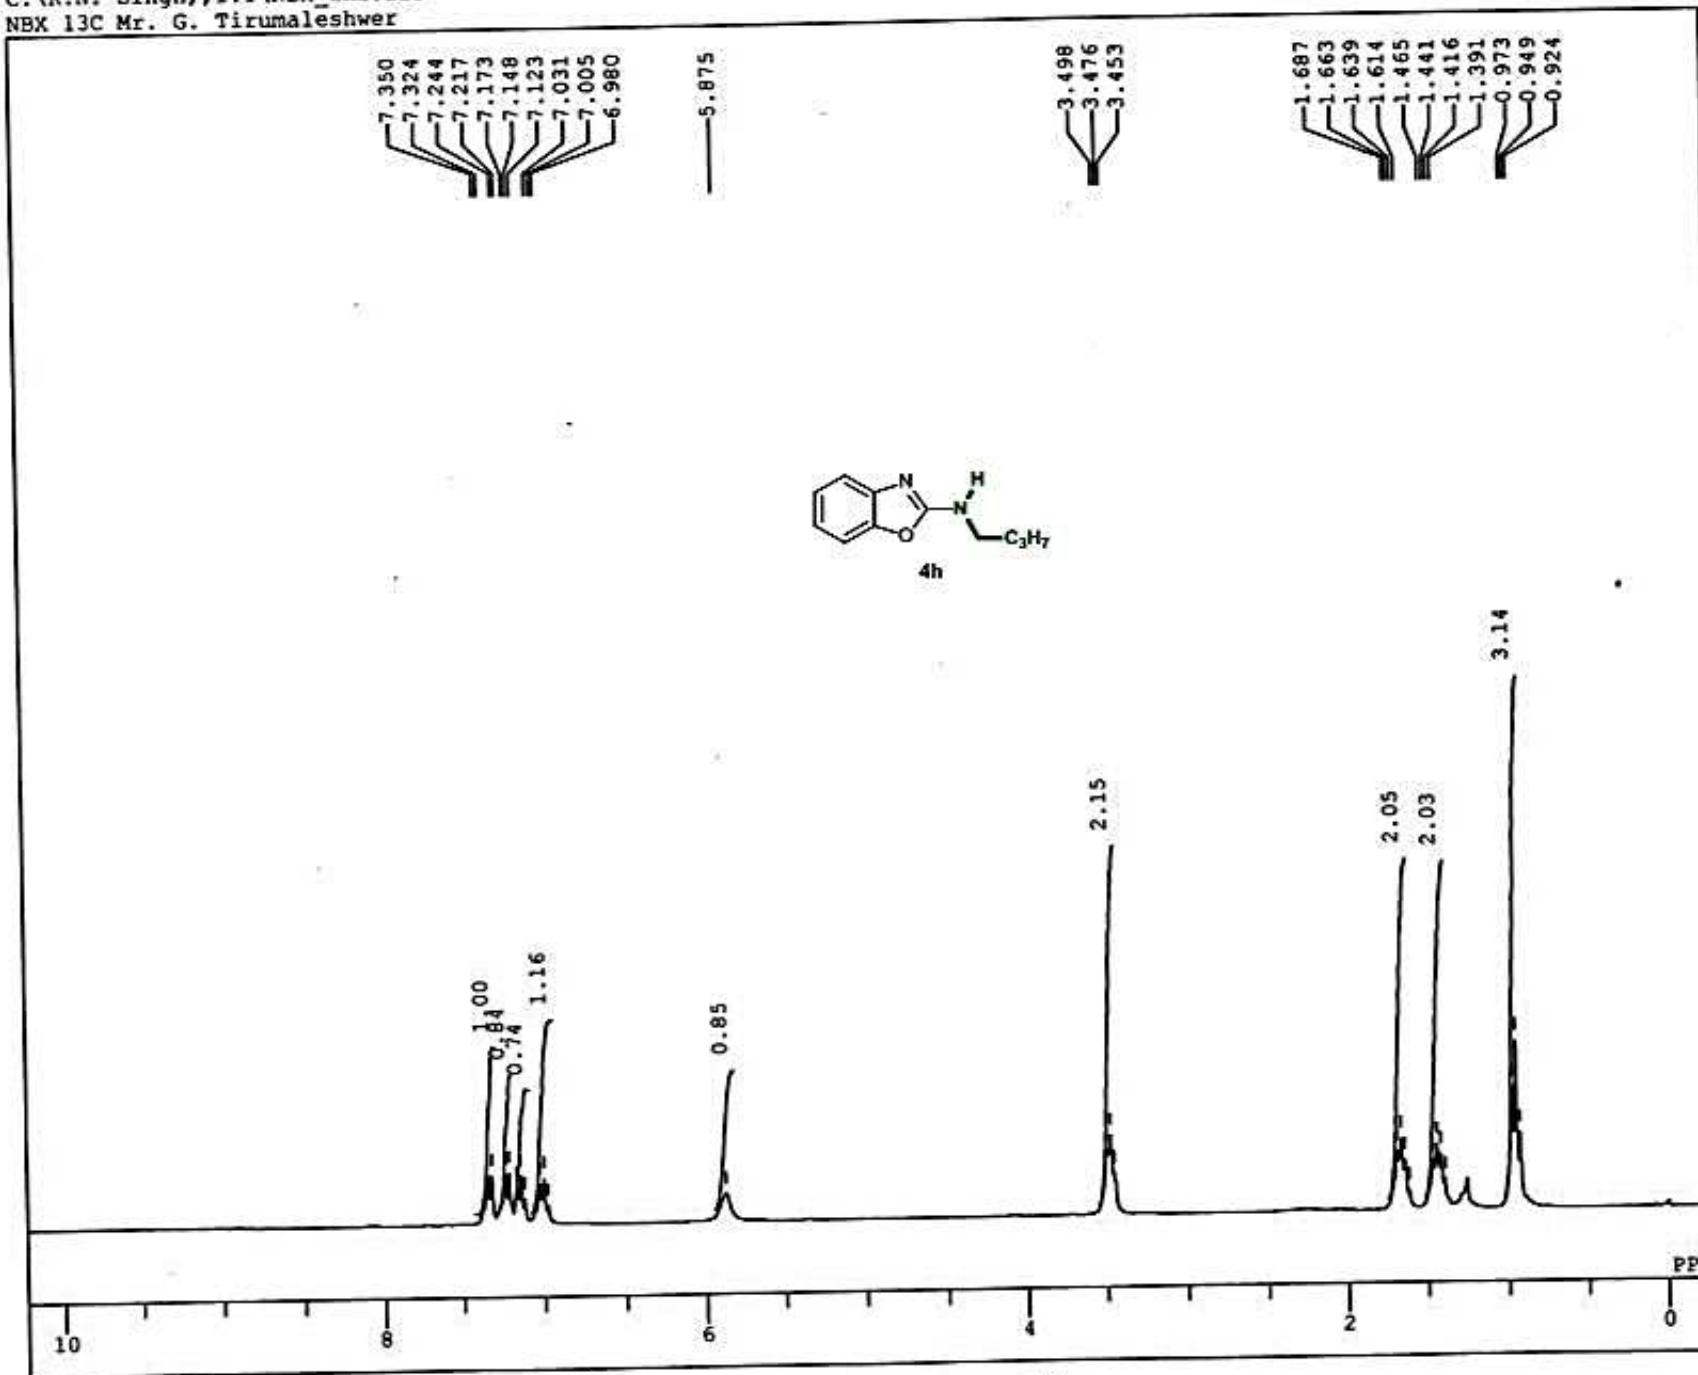

JEOL AL300 FTNMR  
CHEMISTRY DEPARTMENT  
Banaras Hindu University  
VARANASI-221005

Operator : Nagendra Kuma  
Shishir Singh

DFILE C:\K.N. Singh,, I.  
COMNT NBX\_13C Mr. G. Ti  
DATIM Tue Sep 18 20:27:  
OBNUC 1H  
EXMOD NON  
OBFRQ 300.40 MHz  
OBSET 130.00 KHz  
OBFIN 1150.0 Hz  
POINT 32768  
FREQU 6016.8 Hz  
SCANS 32  
ACQTM 5.446 sec  
PD 1.547 sec  
PW1 5.2 us  
IRNUC 1H  
CTEMP 20.5 c  
SLVNT CDCL3  
EXREF 0.00 ppm  
BF 1.20 Hz  
RGAIN 12

C:\K.N. Singh,,I.T\NBX\_13C.als  
NBX 13C Mr. G. Tirumaleshwer

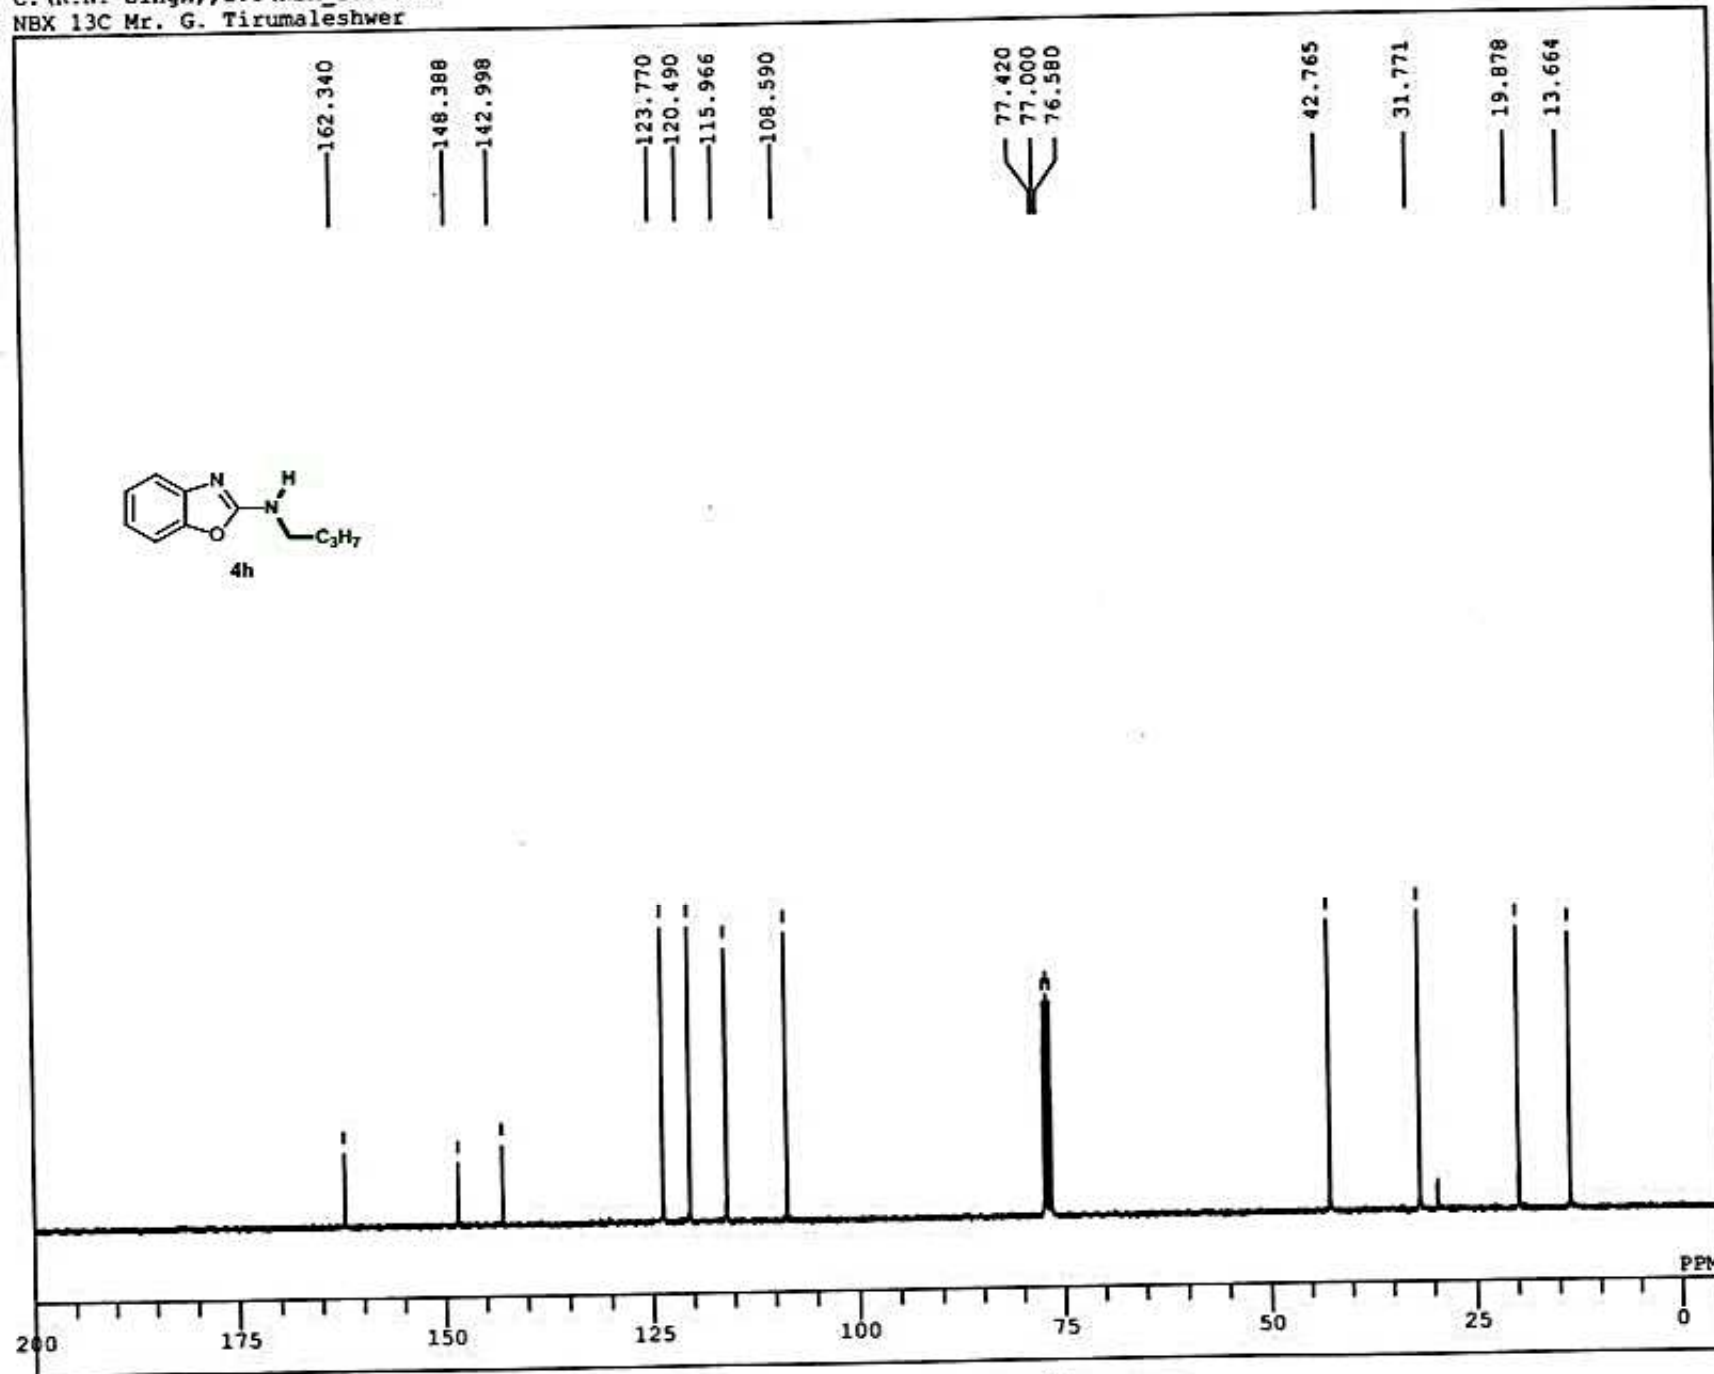

JEOL AL300 FTNMR  
CHEMISTRY DEPARTMENT  
Banaras Hindu University  
VARANASI-221005

Operator : Nagendra Kuma  
Shishir Singh

DFILE C:\K.N. Singh,,I.  
COMNT NBX\_13C\_Mr. G. Ti  
DATIM Tue Sep 18 20:23:  
OBNUC 13C  
EXMOD BCM  
OBFRQ 75.45 MHz  
OBSET 127.30 KHz  
OBFIN 44.7 Hz  
POINT 32768  
FREQU 20408.1 Hz  
SCANS 1500  
ACQTM 1.606 sec  
PD 1.394 sec  
PW1 6.0 us  
IRNUC 1H  
CTEMP 21.3 c  
SLVNT CDCL3  
EXREF 77.00 ppm  
BF 1.20 Hz  
RGAIN 25

C:\K.N. Singh,,I.T\DBB\_1H.als  
DBB 1H Mr. G. Tirumaleswara Rao

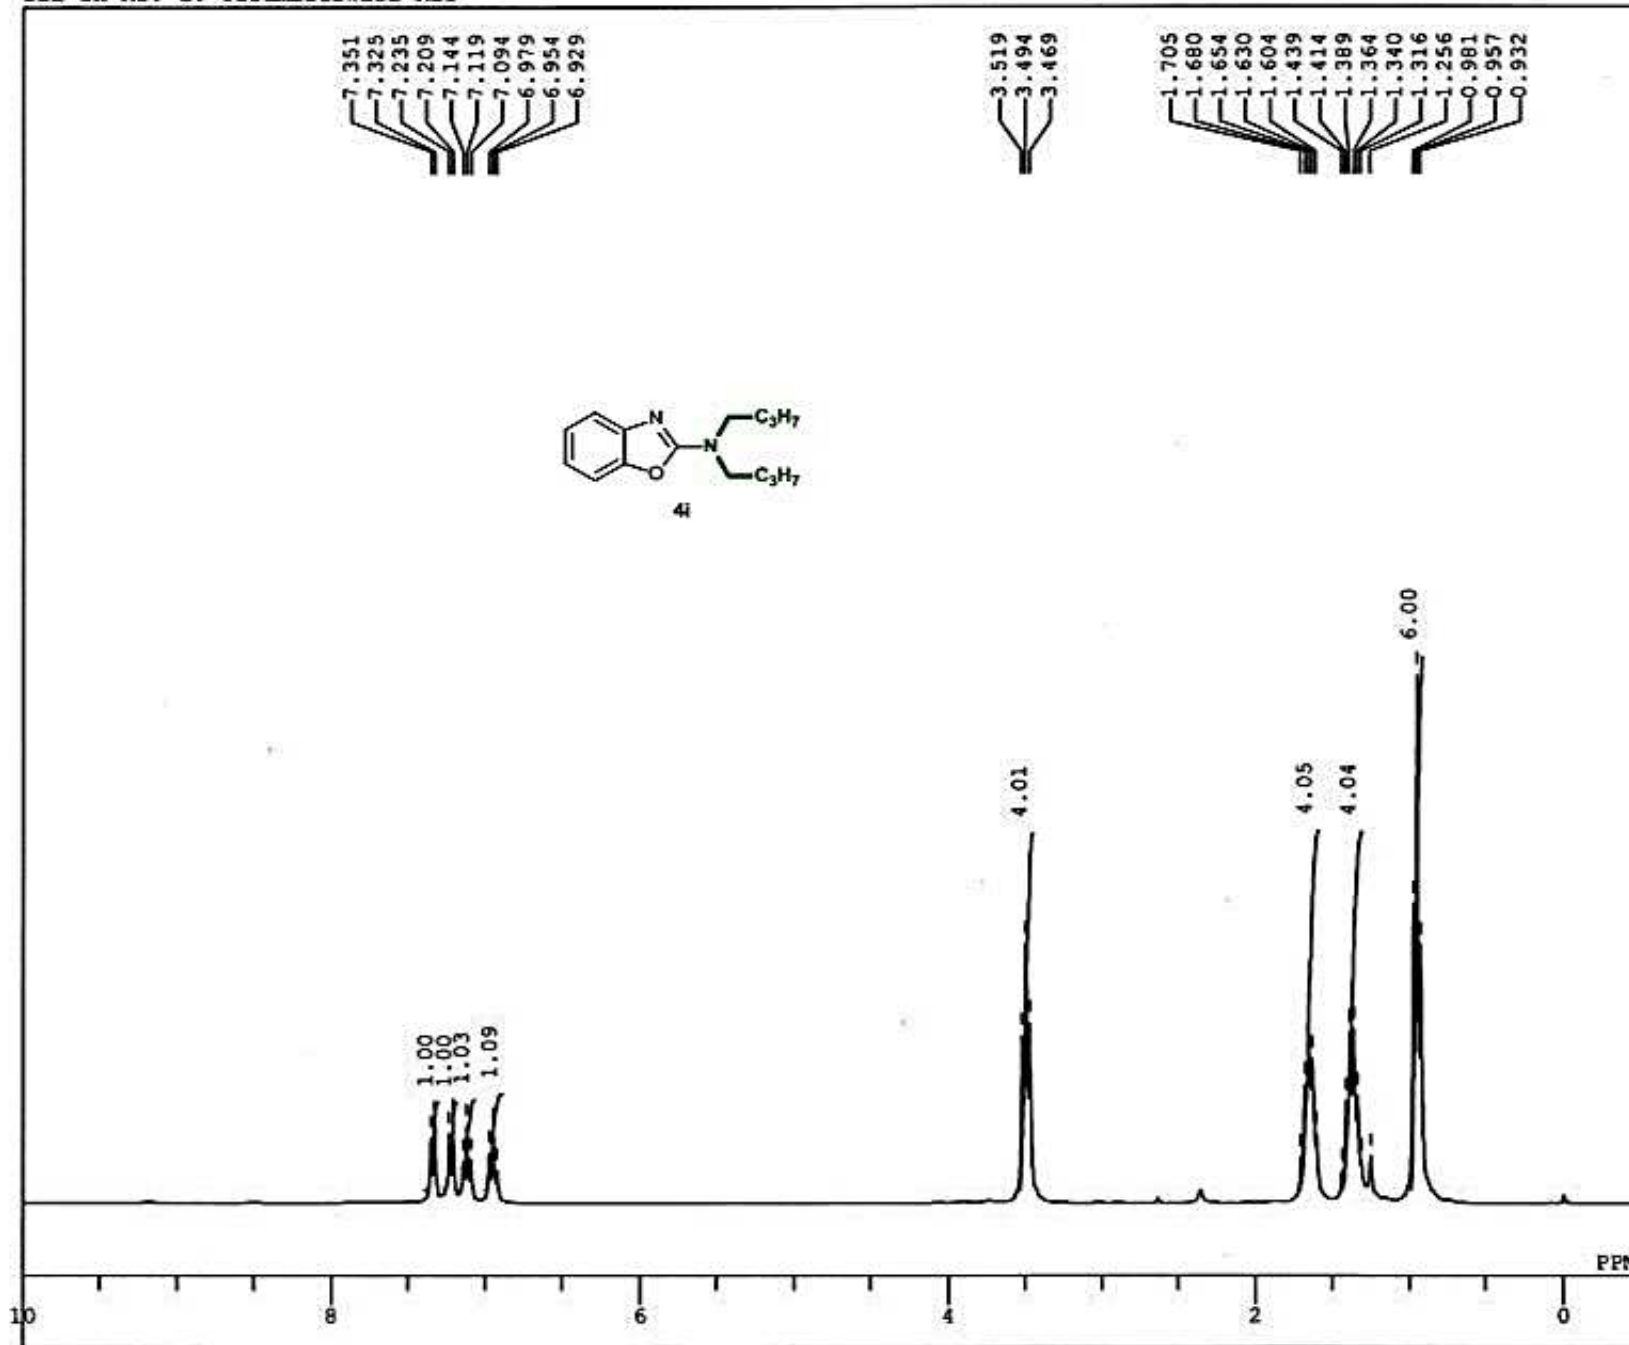

JEOL AL300 FTNMR  
CHEMISTRY DEPARTMENT  
Banaras Hindu University,  
VARANASI-221005

Operator : Nagendra Kumar  
Shishir Singh

DFILE C:\K.N. Singh,,I.T\DBB\_1H.Mr. G. Tirumale:  
COMNT DBB\_1H\_Mr. G. Tirumale:  
DATIM Mon Sep 24 14:52:27 20:  
OBNUC 1H  
EXMOD NON  
OBFRQ 300.40 MHz  
OBSET 130.00 KHz  
OBFIN 1150.0 Hz  
POINT 32768  
FREQU 9505.7 Hz  
SCANS 45  
ACQTM 3.447 sec  
PD 1.547 sec  
PW1 5.2 us  
IRNUC 1H  
CTEMP 19.9 c  
SLVNT CDCL3  
EXREF 0.00 ppm  
BF 1.20 Hz  
RGAIN 8

C:\K.N. Singh,,I.T\DBB 13C.als  
DBB 13C Mr.G.Tirumaleshwara

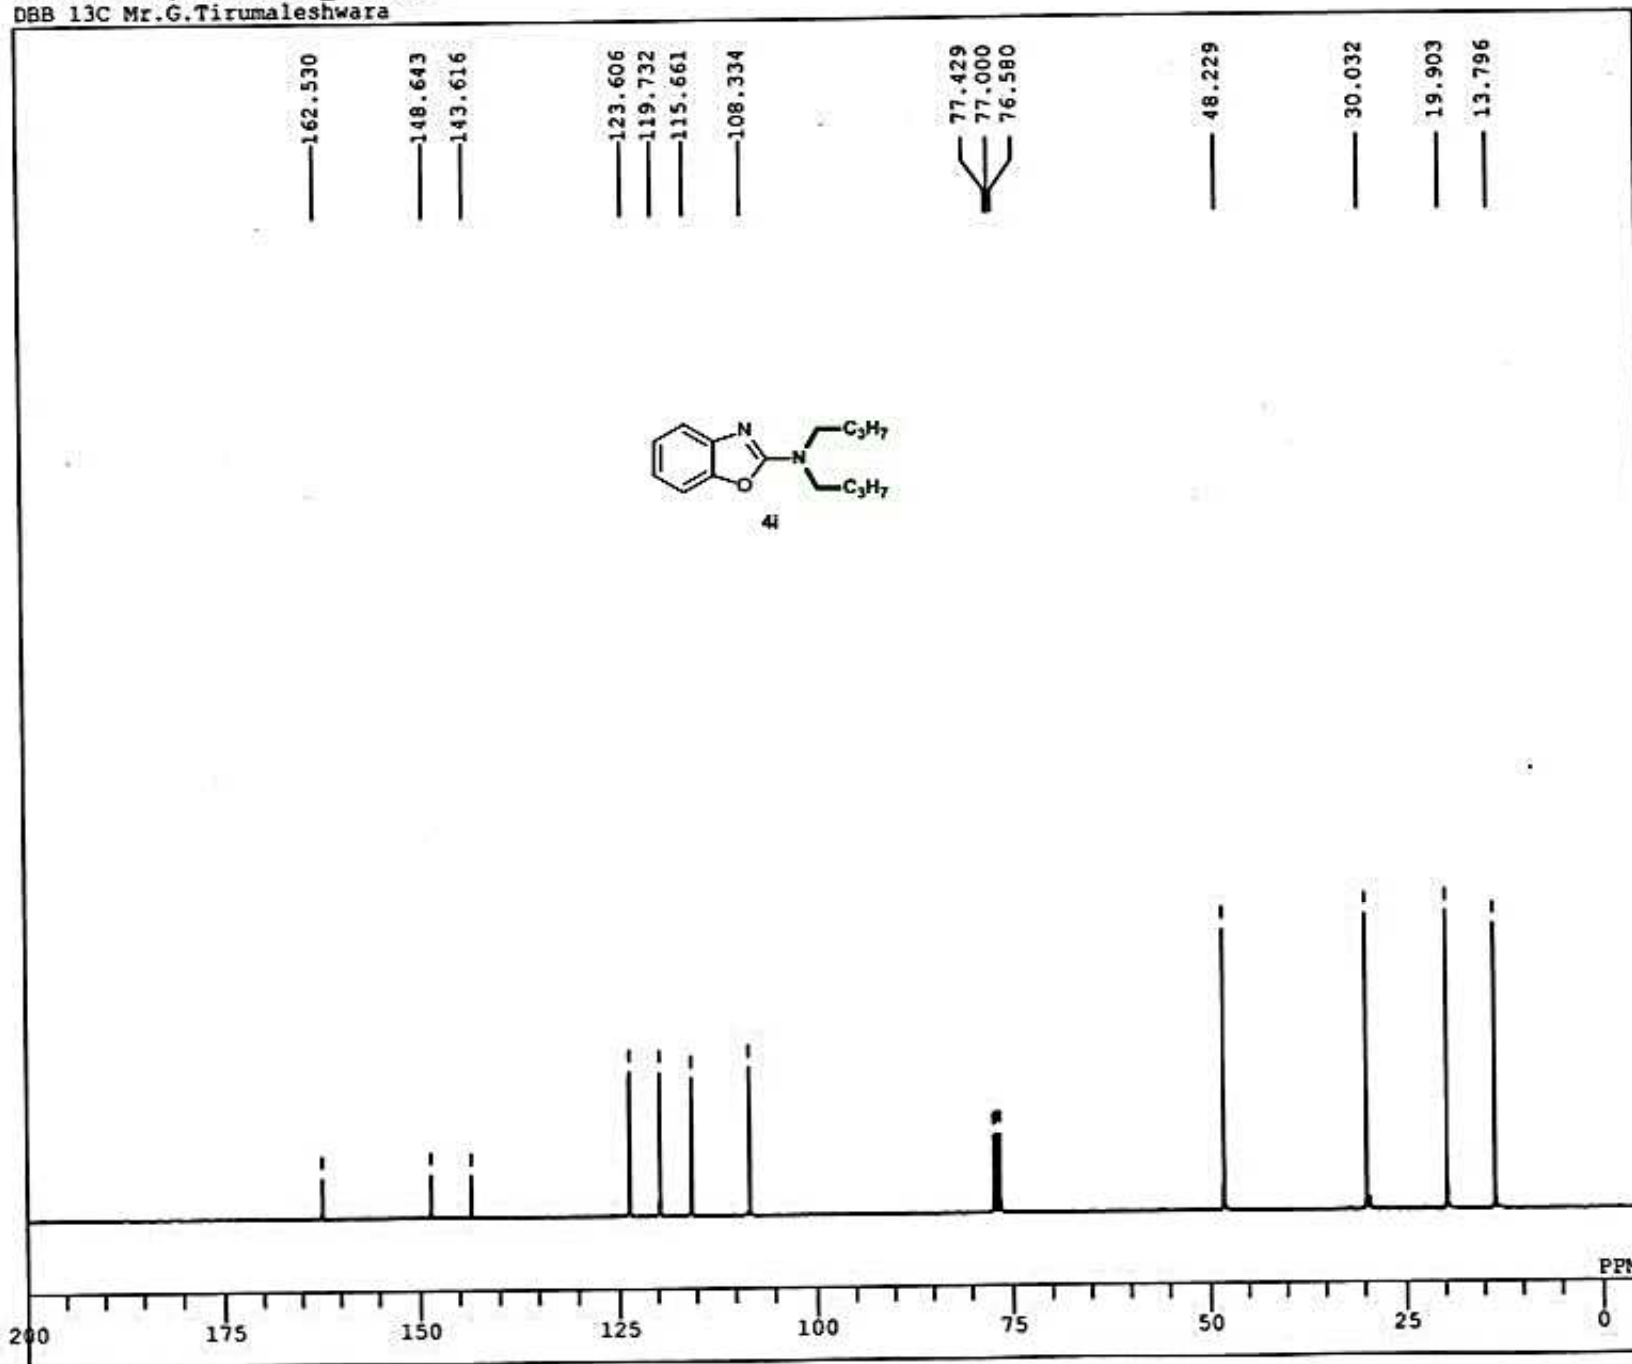

JEOL AL300 FTNMR  
CHEMISTRY DEPARTMENT  
Banaras Hindu University,  
VARANASI-221005

Operator : Nagendra Kumar  
Shishir Singh

DFILE C:\K.N. Singh,,I.T\DBB  
COMNT DBB\_13C\_Mr.G.Tirumalesh  
DATIM Wed Sep 26 08:49:38 201  
OBNUC 13C  
EXMOD BCM  
OBFRQ 75.45 MHz  
OBSET 127.30 KHz  
OBFIN 44.7 Hz  
POINT 32768  
FREQU 20408.1 Hz  
SCANS 2000  
ACQTM 1.606 sec  
PD 1.394 sec  
PW1 6.0 us  
IRNUC 1H  
CTEMP 18.6 c  
SLVNT CDCL3  
EXREF 77.00 ppm  
BF 1.22 Hz  
RGAIN 23

C:\Rahul singh\COH\_1H.als  
COH\_1H Mr. Rahul Singh

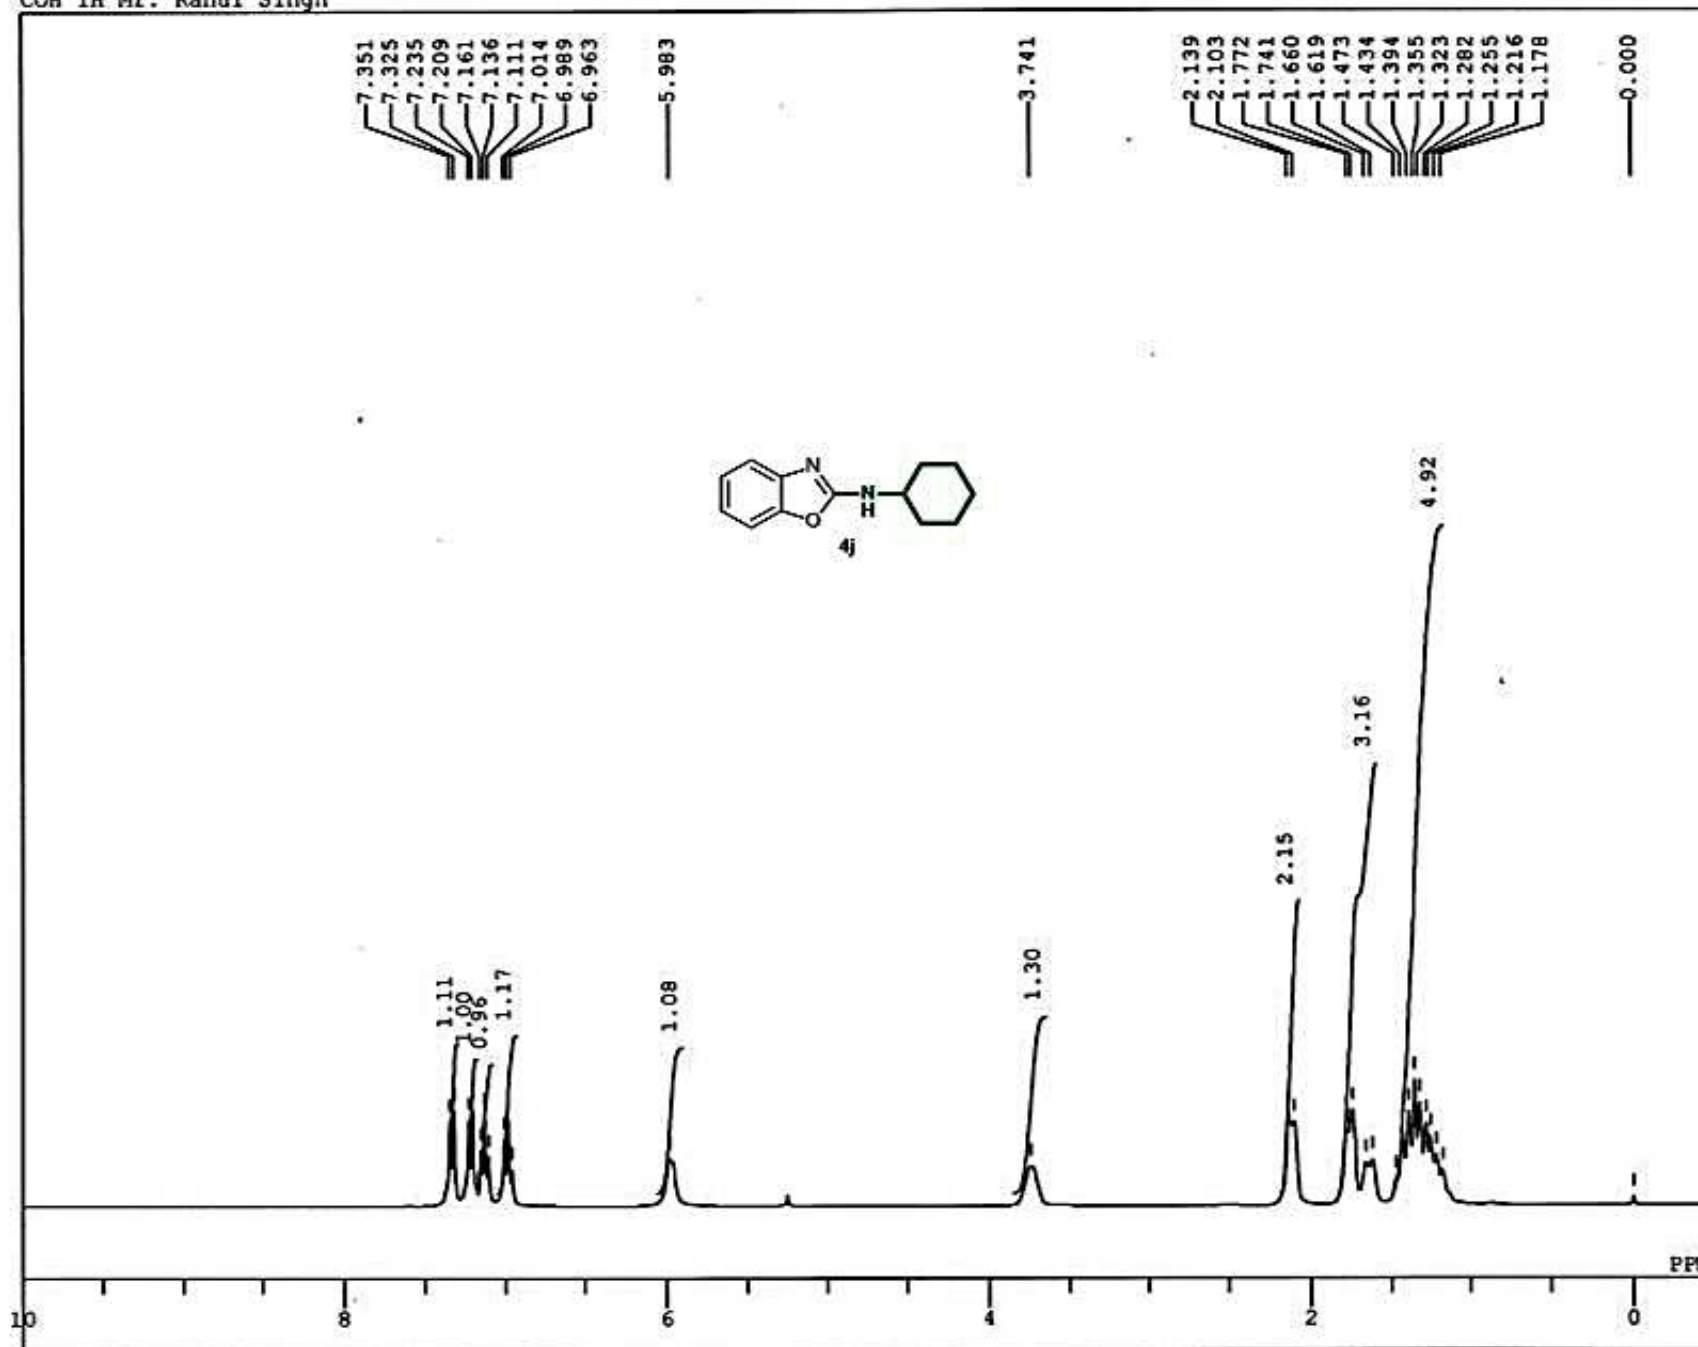

JEOL AL300 FTNMR  
CHEMISTRY DEPARTMENT  
Banaras Hindu University  
VARANASI-221005

Operator : Nagendra Kuma  
Shishir Singh

DFILE C:\Rahul singh\CO  
COMNT COH\_1H Mr. Rahul  
DATIM Thu Jun 28 14:56:  
OBNUC 1H  
EXMOD NON  
OBFRQ 300.40 MHz  
OBSET 130.00 KHz  
OBFIN 1150.0 Hz  
POINT 32768  
FREQU 9505.7 Hz  
SCANS 16  
ACQTM 3.447 sec  
PD 1.547 sec  
PW1 5.2 us  
IRNUC 1H  
CTEMP 22.1 c  
SLVNT CDCL3  
EXREF 0.00 ppm  
BF 1.20 Hz  
RGAIN 11



C:\Rahul singh\COH\_13C.als  
COH 13C Mr.Rahul Singh

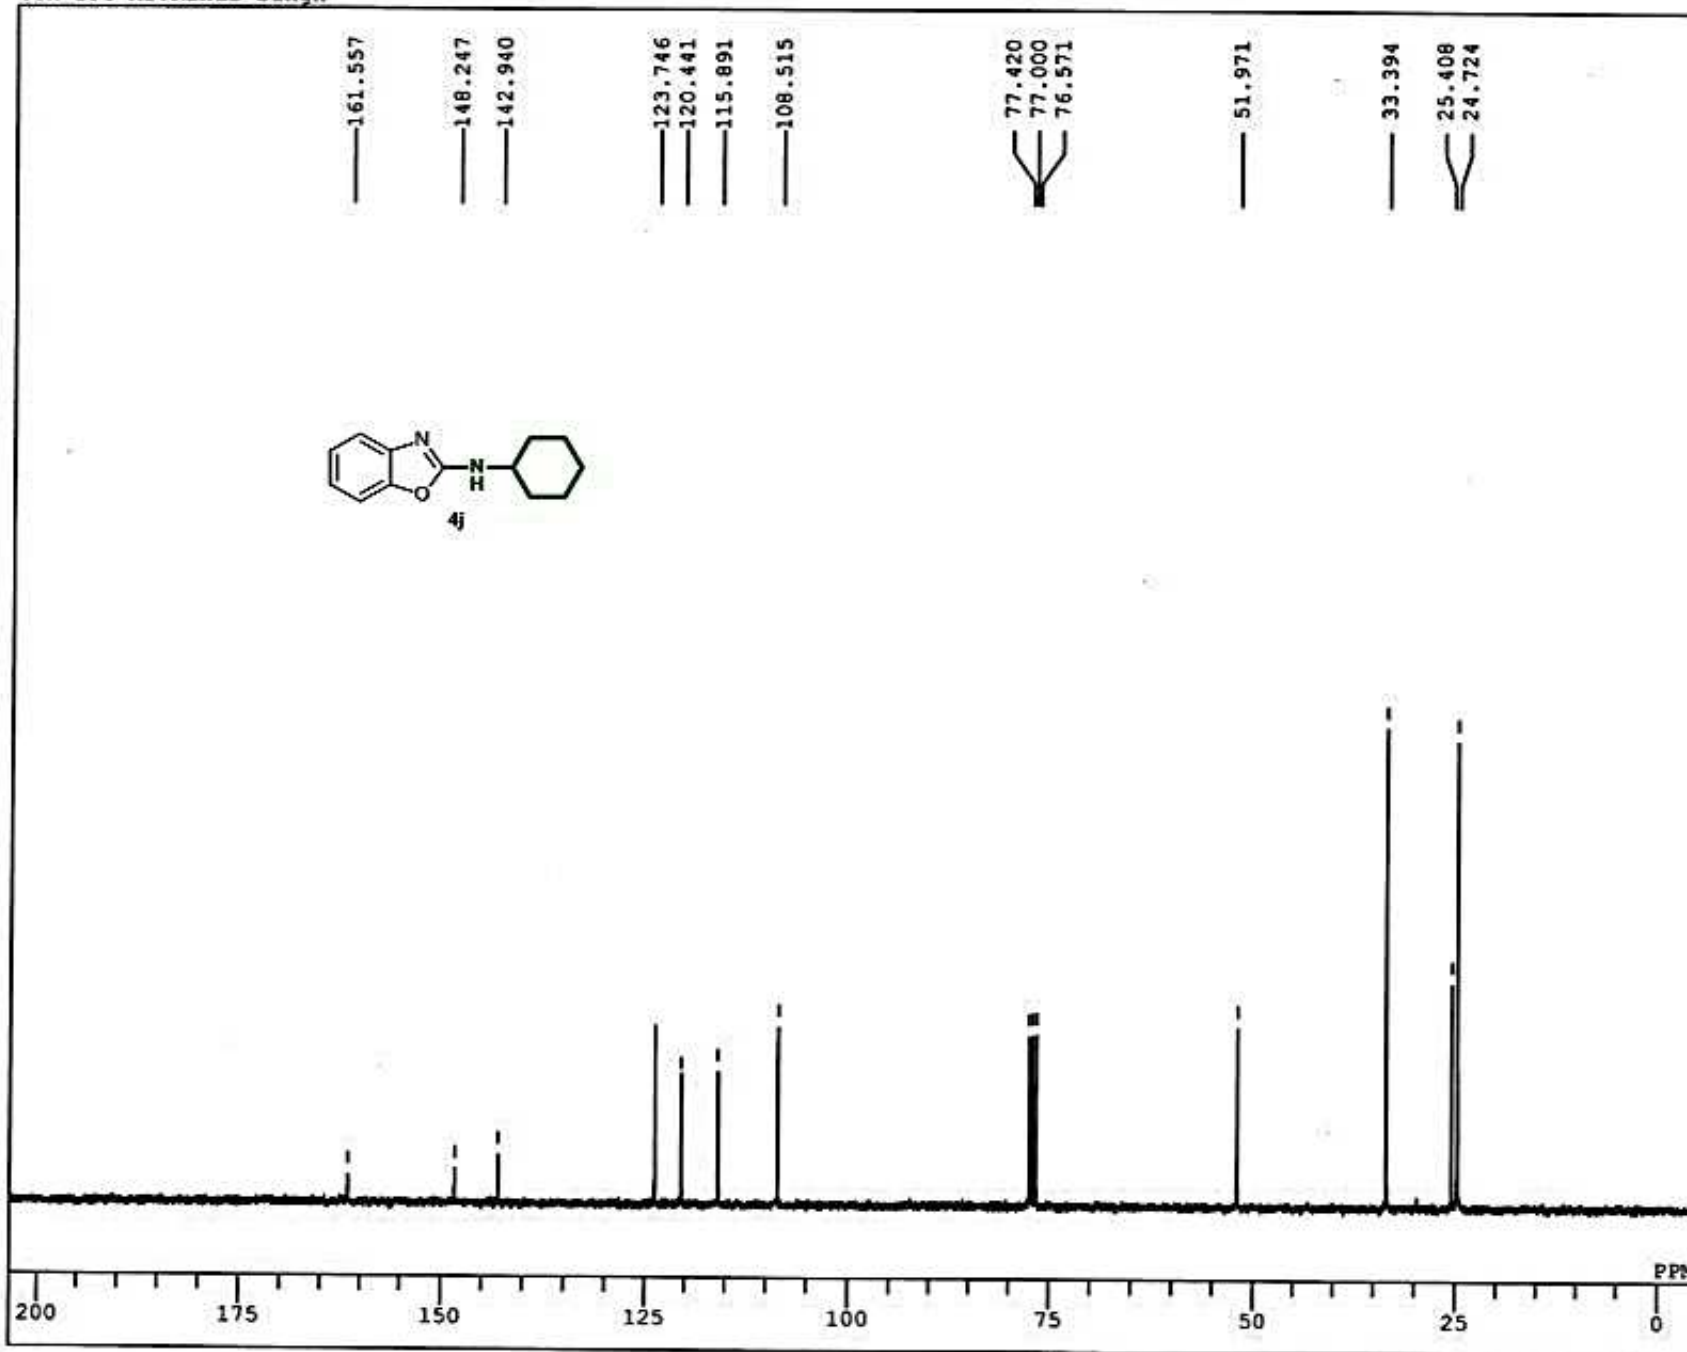

JEOL AL300 FTNMR  
CHEMISTRY DEPARTMENT  
Banaras Hindu University  
VARANASI-221005

Operator : Nagendra Kuma  
Shishir Singh

DFILE C:\Rahul singh\CO  
COMNT COH\_13C\_Mr.Rahul  
DATIM Wed Jul 04 15:22:  
OBNUC 13C  
EXMOD BCM  
OBFRQ 75.45 MHz  
OBSET 127.30 KHz  
OBFIN 44.7 Hz  
POINT 32768  
FREQU 20408.1 Hz  
SCANS 173  
ACQTM 1.606 sec  
PD 1.394 sec  
PW1 6.0 us  
IRNUC 1H  
CTEMP 20.9 c  
SLVNT CDCL3  
EXREF 77.00 ppm  
BF 1.20 Hz  
RGAIN 24

B<sub>30</sub>

C:\K.N. Singh,,I.T\TBB\_1H.als  
TBB 1H Mr. A. Bharat Kumar

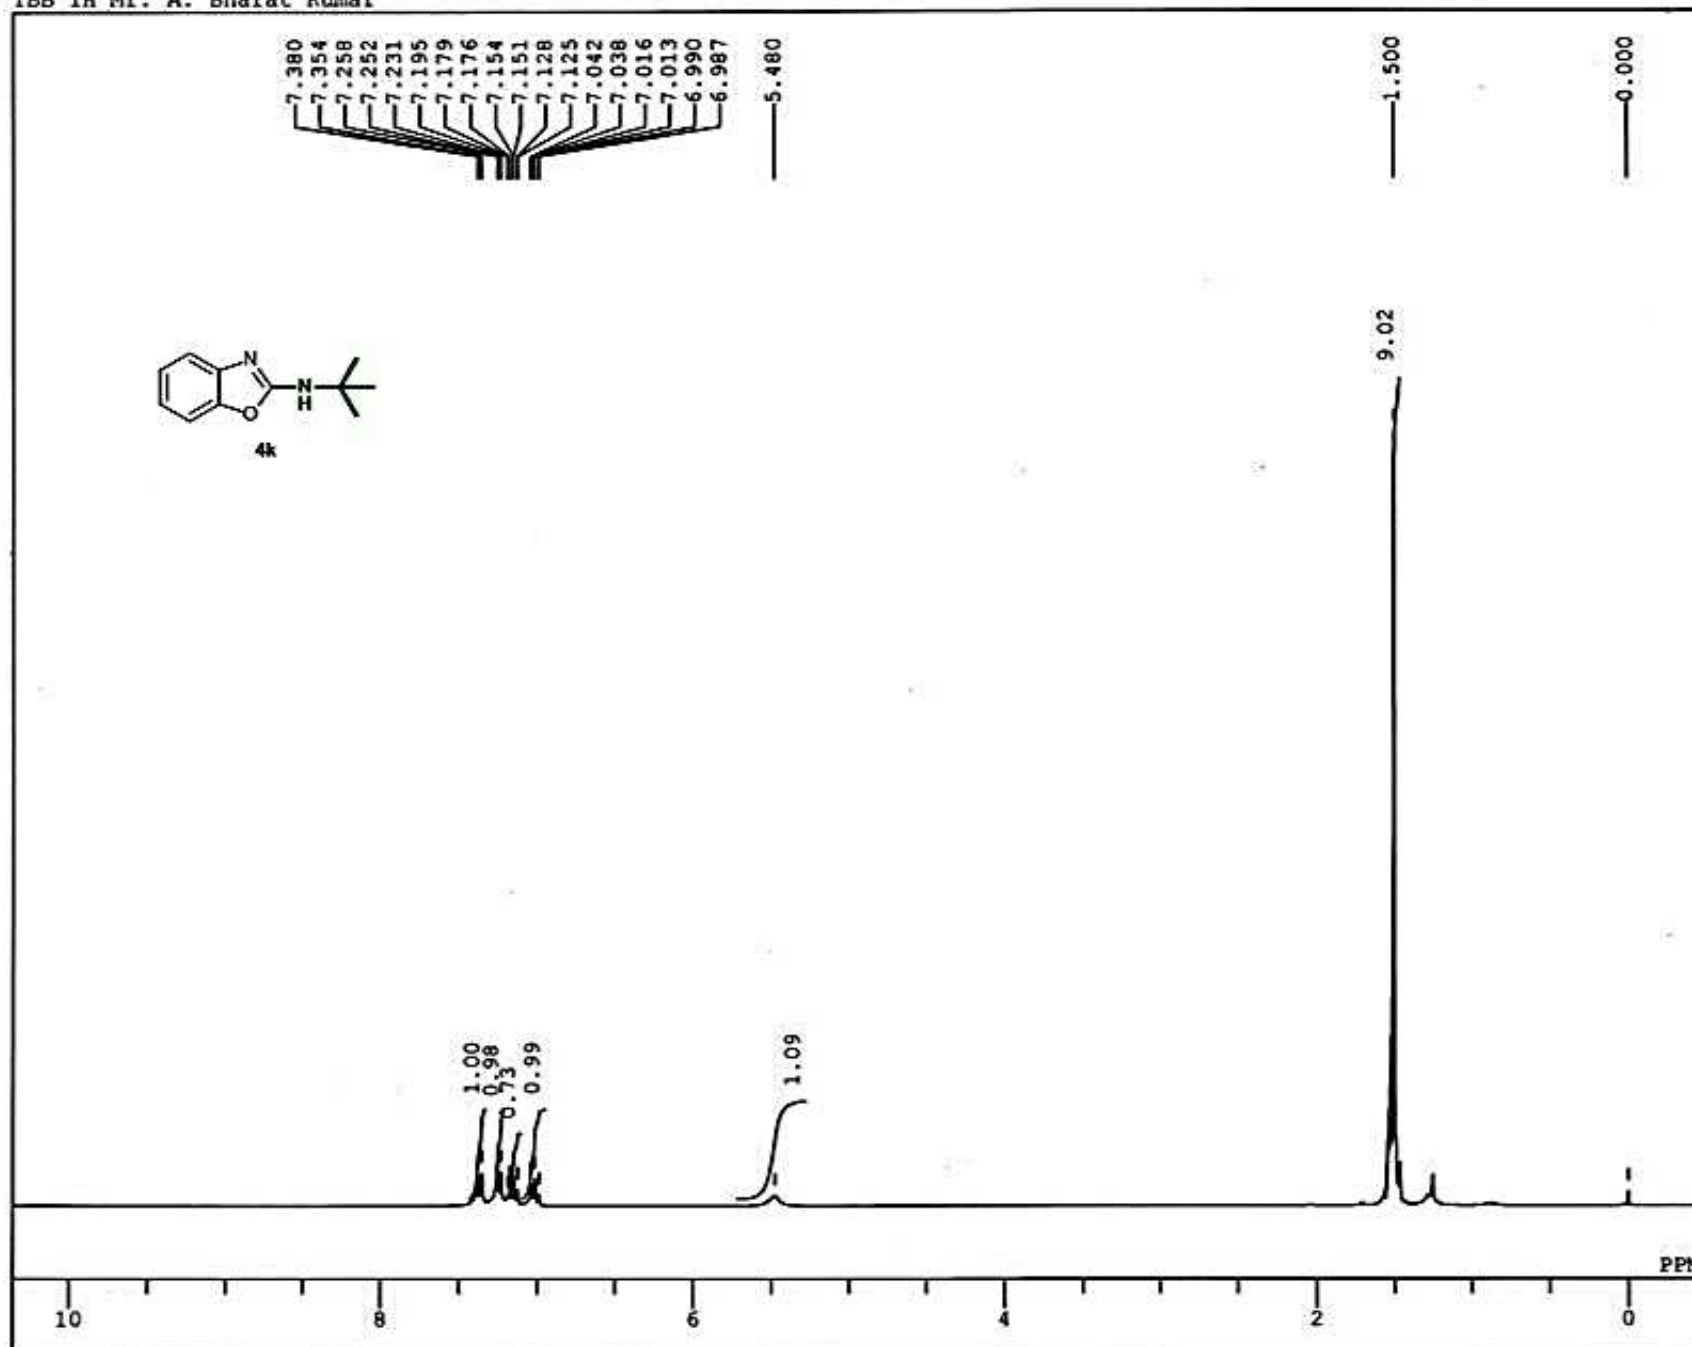

JEOL AL300 FTNMR  
CHEMISTRY DEPARTMENT  
Banaras Hindu University  
VARANASI-221005

Operator : Nagendra Kuma  
Shishir Singh

DFILE C:\K.N. Singh,,I.  
COMNT TBB\_1H Mr. A. Bha  
DATIM Wed Sep 26 15:54:  
OBNUC 1H  
EXMOD NON  
OBFRQ 300.40 MHz  
OBSET 130.00 KHz  
OBFIN 1150.0 Hz  
POINT 32768  
FREQU 9505.7 Hz  
SCANS 16  
ACQTM 3.447 sec  
PD 1.547 sec  
PW1 5.2 us  
IRNUC 1H  
CTEMP 20.3 c  
SLVNT CDCL3  
EXREF 0.00 ppm  
BF 0.12 Hz  
RGAIN 13

C:\K.N. Singh,, I.T\TBB\_13C.als  
TBB\_13C Mr. A. Bharat Kumar

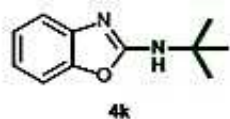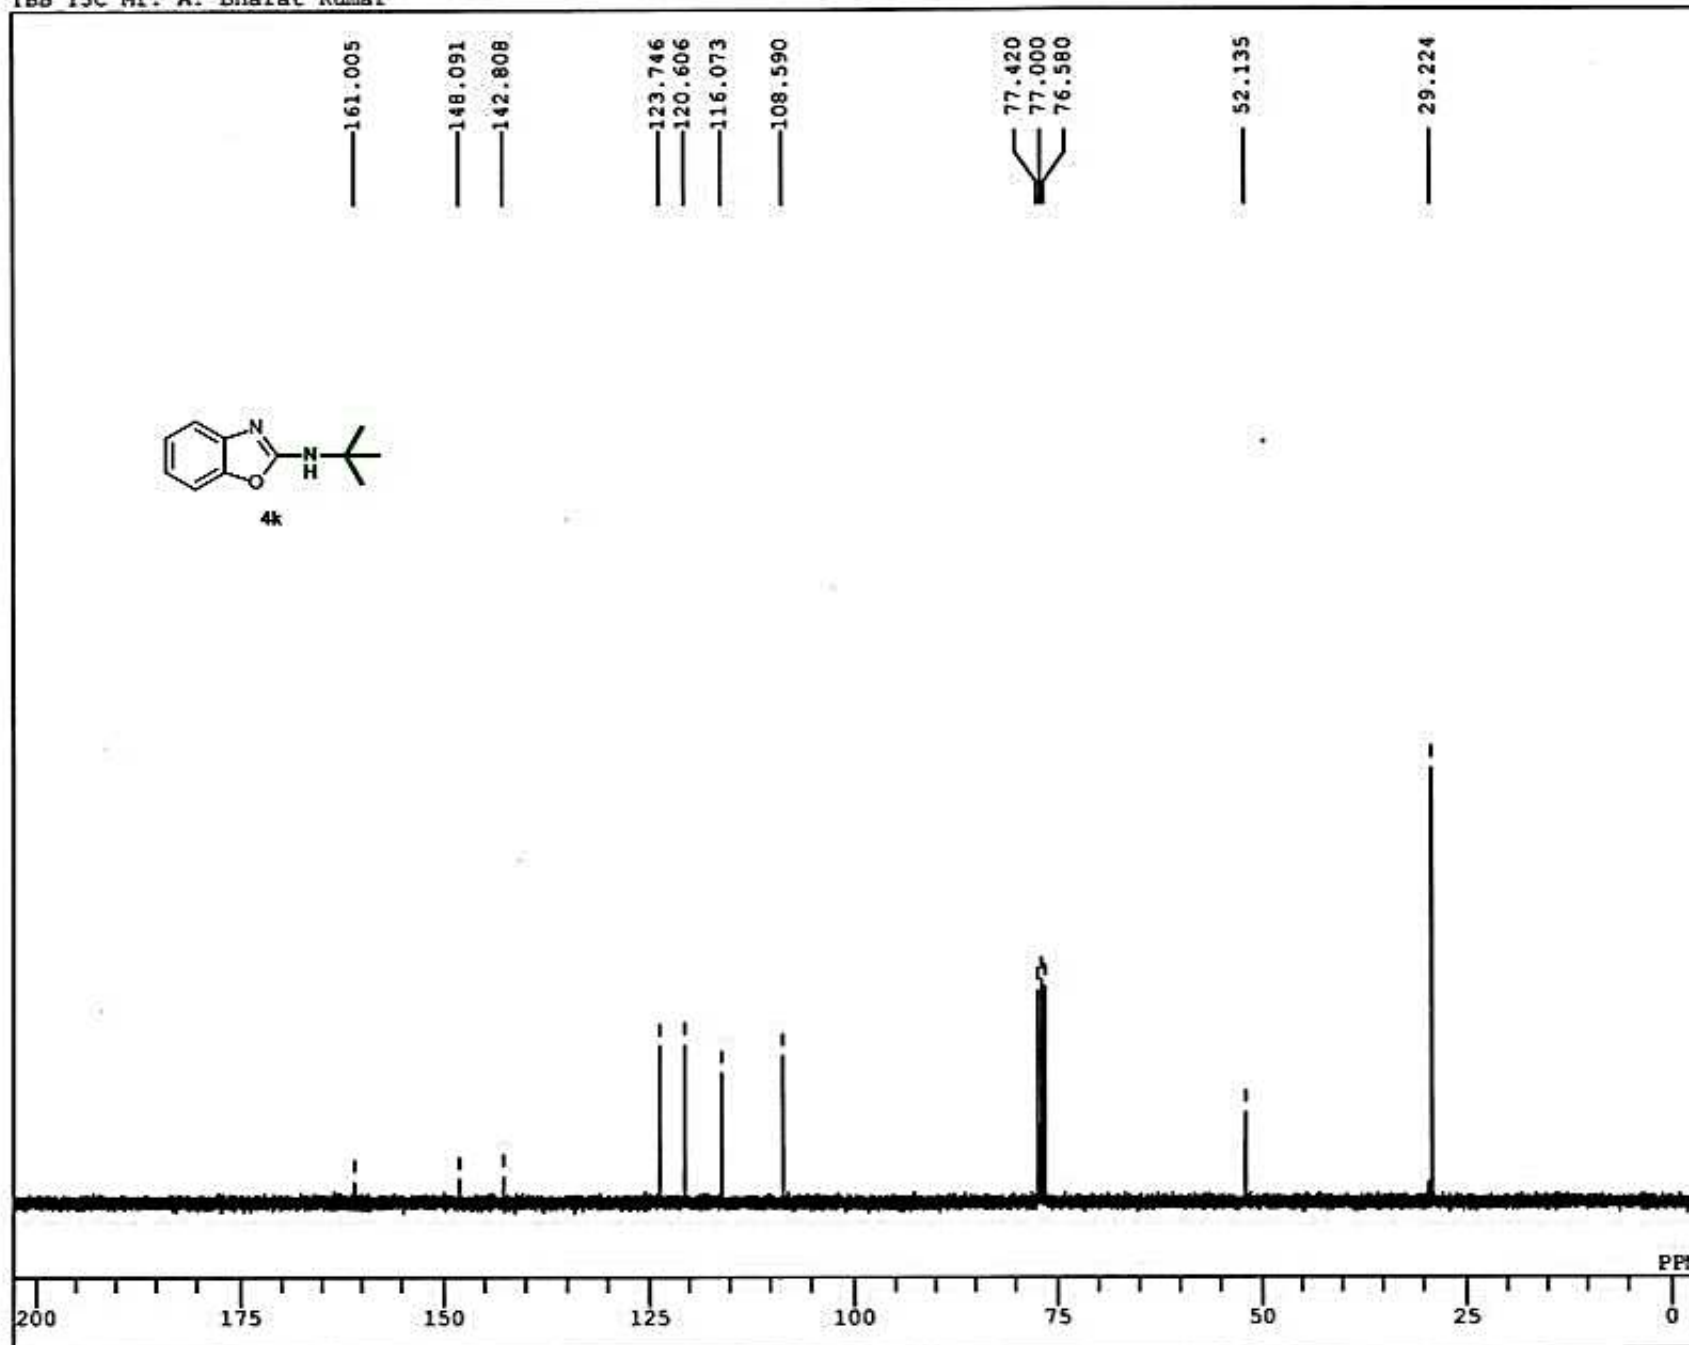

JEOL AL300 FTNMR  
CHEMISTRY DEPARTMENT  
Banaras Hindu University  
VARANASI-221005

Operator : Nagendra Kuma  
Shishir Singh

DFILE C:\K.N. Singh,, I.  
COMNT TBB\_13C Mr. A. Bh.  
DATIM Wed Sep 26 16:21:  
OBNUC 13C  
EXMOD BCM  
OBFRQ 75.45 MHz  
OBSET 127.30 KHz  
OBFIN 44.7 Hz  
POINT 32768  
FREQU 20408.1 Hz  
SCANS 467  
ACQTM 1.606 sec  
PD 1.394 sec  
PW1 6.0 us  
IRNUC 1H  
CTEMP 23.5 c  
SLVNT CDCL3  
EXREF 77.00 ppm  
BF 0.12 Hz  
RGAIN 25

B<sub>32</sub>



C:\K.N. Singh,,I.T\2-PEA\_1H.als  
2-PEA 1H Mr. G. Tirumaleshwer

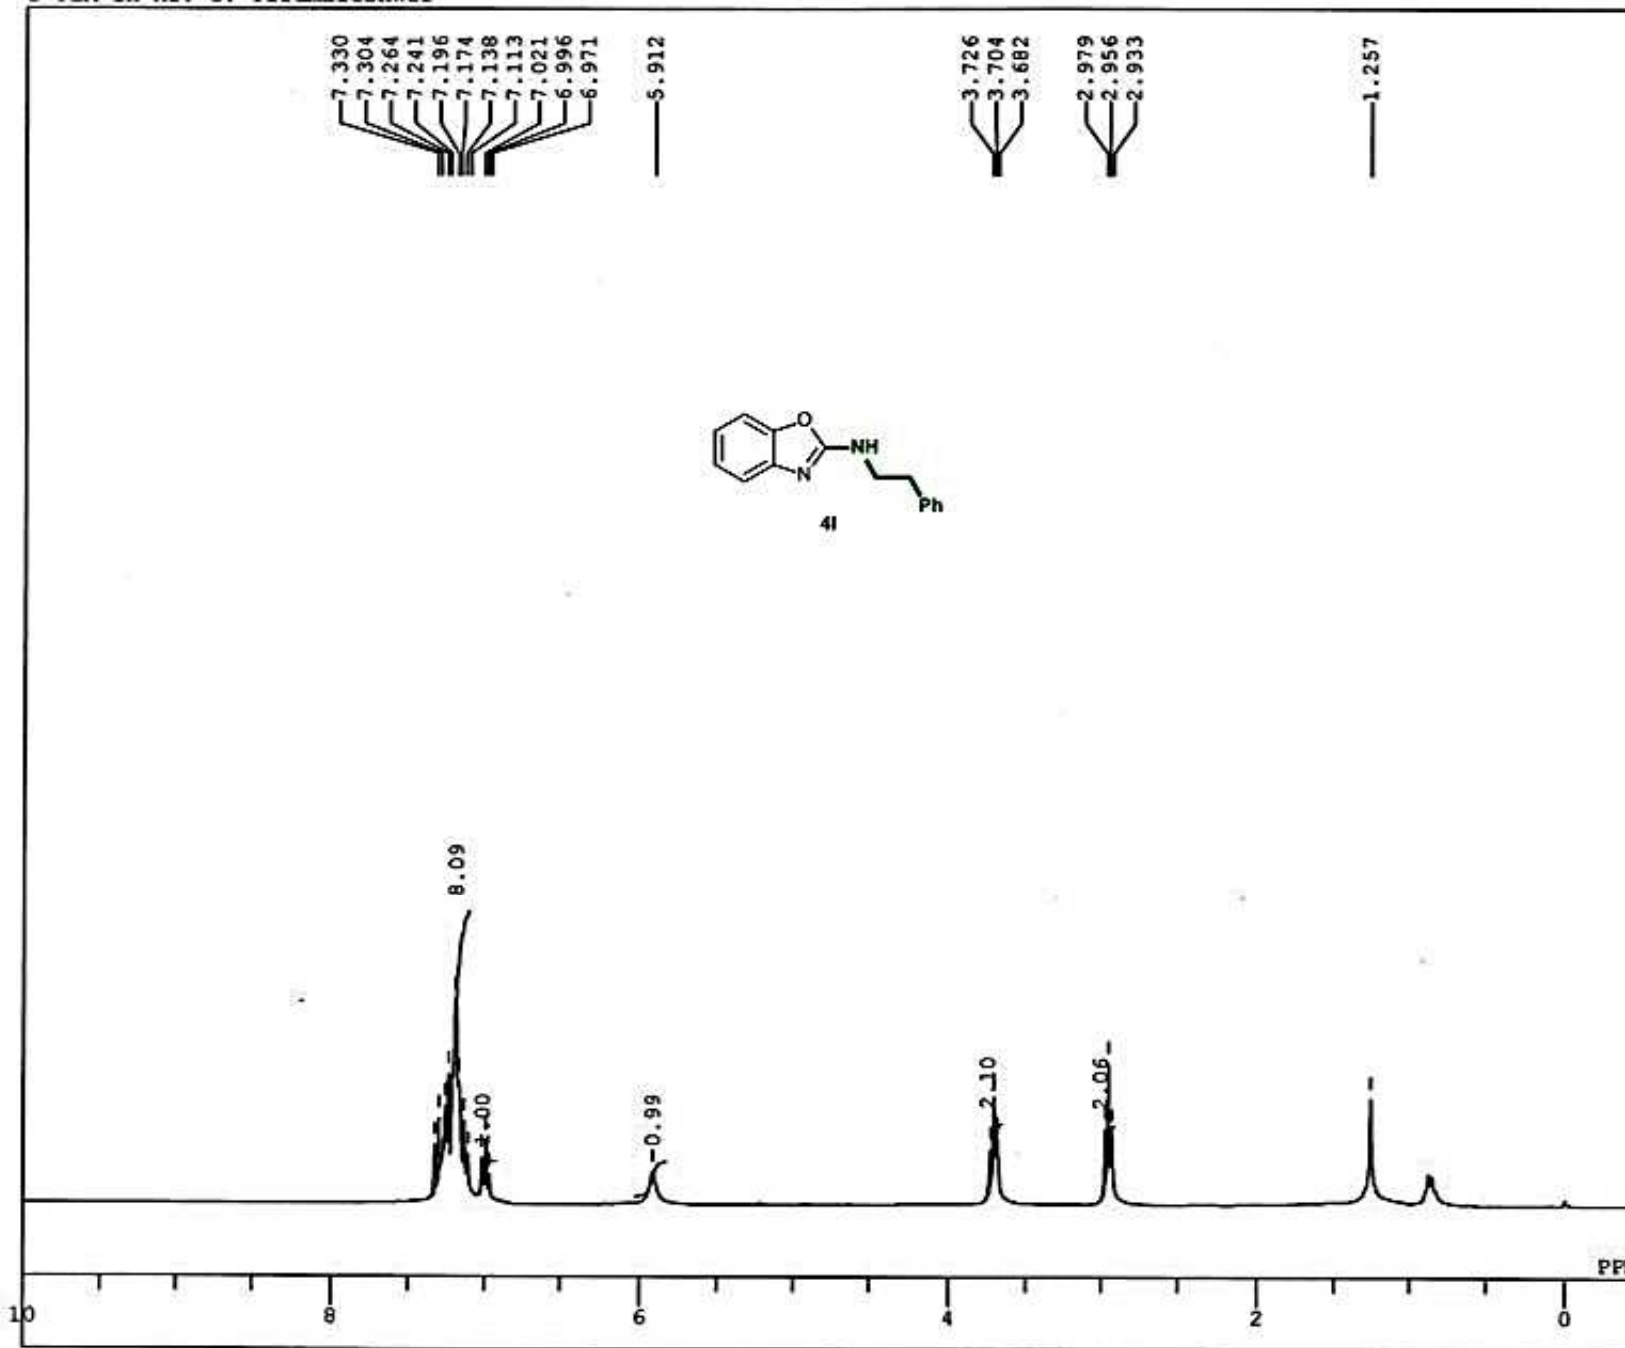

JEOL AL300 FTNMR  
CHEMISTRY DEPARTMENT  
Banaras Hindu University,  
VARANASI-221005

Operator : Nagendra Kumar  
Shishir Singh

DFILE C:\K.N. Singh,,I.T\2-PEA\_1H.als  
COMNT 2-PEA\_1H Mr. G. Tirumaleshwer  
DATIM Sat Dec 01 15:12:22 2013  
OBNUC 1H  
EXMOD NON  
OBFRQ 300.40 MHz  
OBSET 130.00 KHz  
OBFIN 1150.0 Hz  
POINT 32768  
FREQU 9505.7 Hz  
SCANS 8  
ACQTM 3.447 sec  
PD 1.547 sec  
PW1 5.2 us  
IRNUC 1H  
CTEMP 20.2 c  
SLVNT CDCL3  
EXREF 0.00 ppm  
BF 1.20 Hz  
RGAIN 11

C:\K.N. Singh,,I.T\2-PEA\_13C.als  
2-PEA 13C Mr. G. Tirumaleshwer

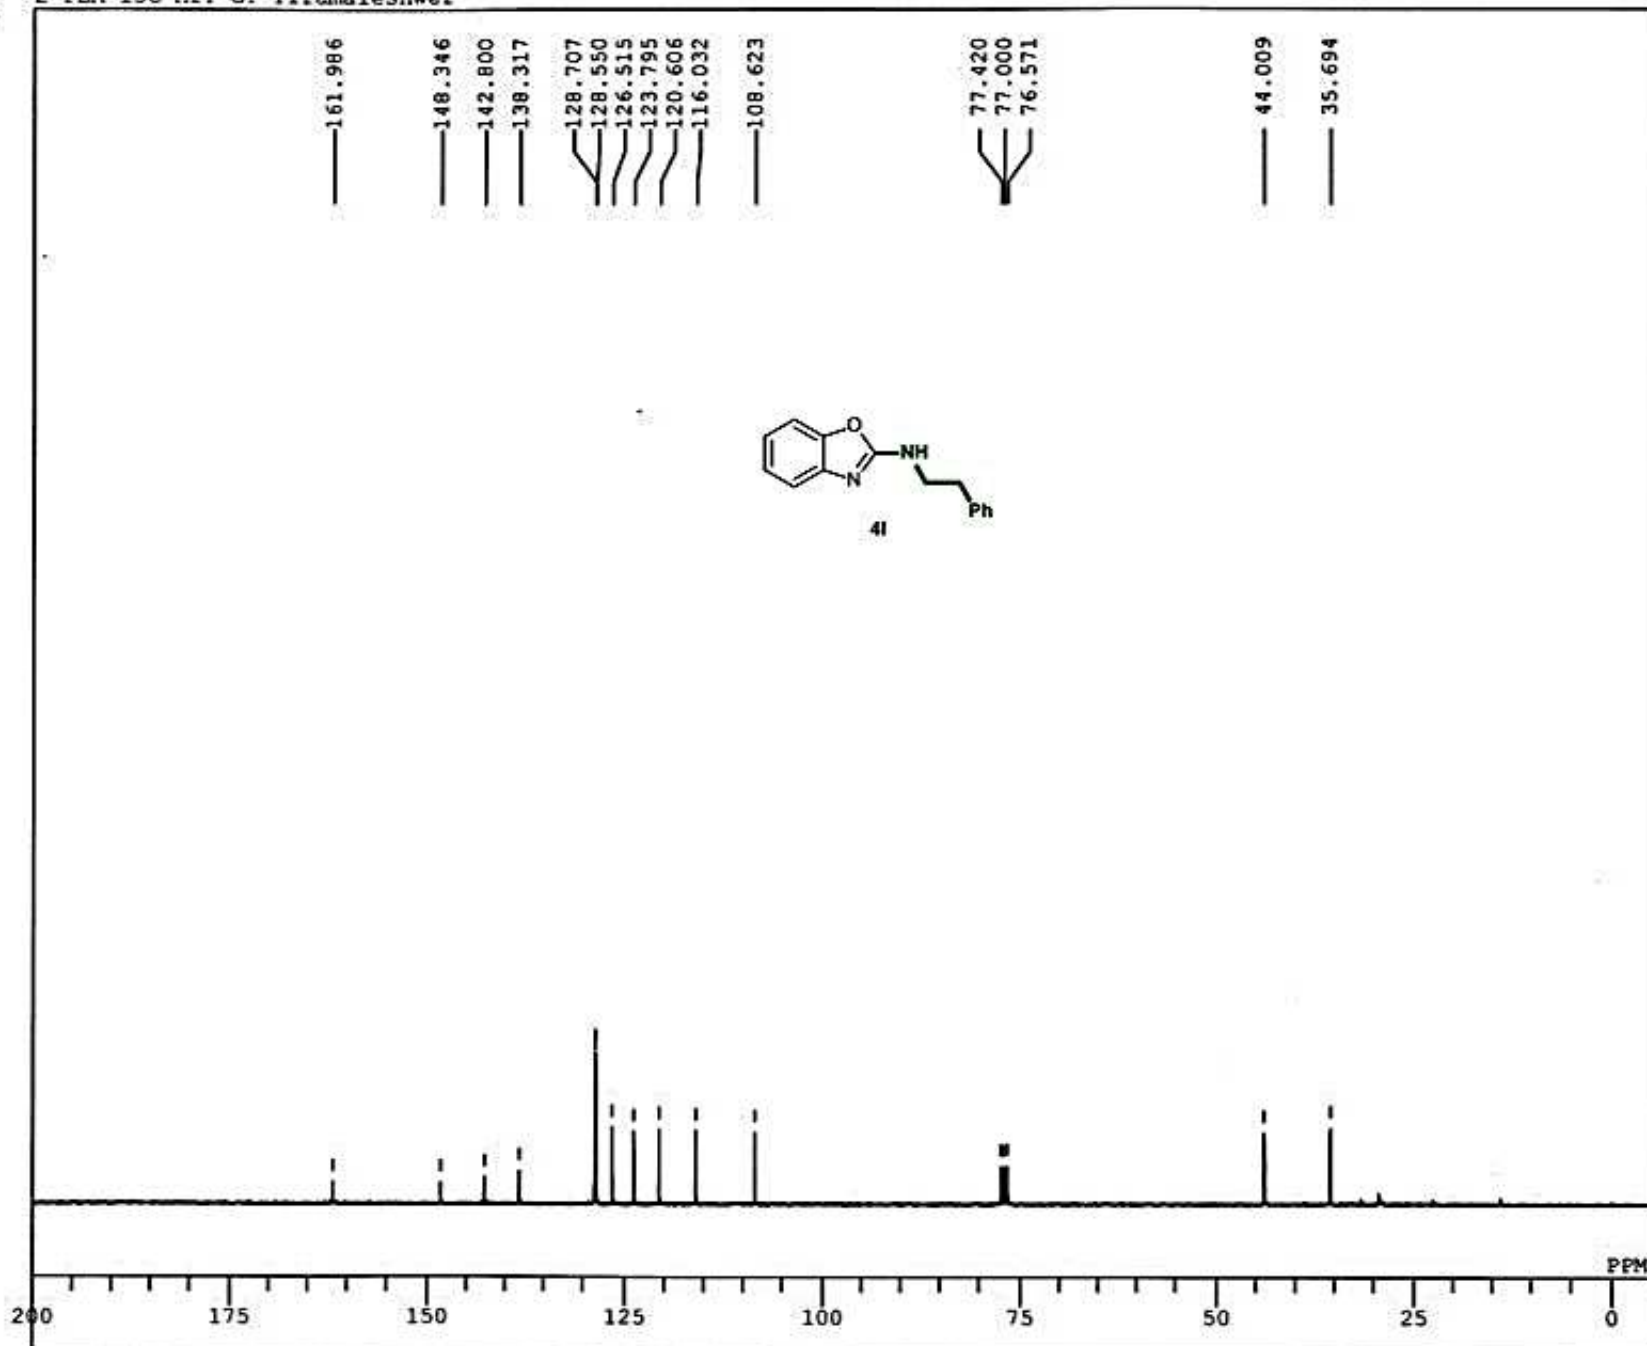

JEOL AL300 FTNMR  
CHEMISTRY DEPARTMENT  
Banaras Hindu University,  
VARANASI-221005

Operator : Nagendra Kumar  
Shishir Singh

DFILE C:\K.N. Singh,,I.T\2-PEA\_13C.als  
COMNT 2-PEA 13C Mr. G. Tirumaleshwer  
DATIM Sat Dec 01 15:07:55 2012  
OBNUC 13C  
EXMOD BCM  
OBFRQ 75.45 MHz  
OBSET 127.30 KHz  
OBFIN 44.7 Hz  
POINT 32768  
FREQU 20408.1 Hz  
SCANS 81  
ACQTM 1.606 sec  
PD 1.394 sec  
PW1 6.0 us  
IRNUC 1H  
CTEMP 19.9 c  
SLVNT CDCL3  
EXREF 77.00 ppm  
BF 1.20 Hz  
RGAIN 25

C:\K.N. Singh,,I.T\BEP\_1H.als  
BEP\_1H Mr. G. Tirumaleshwar Rao

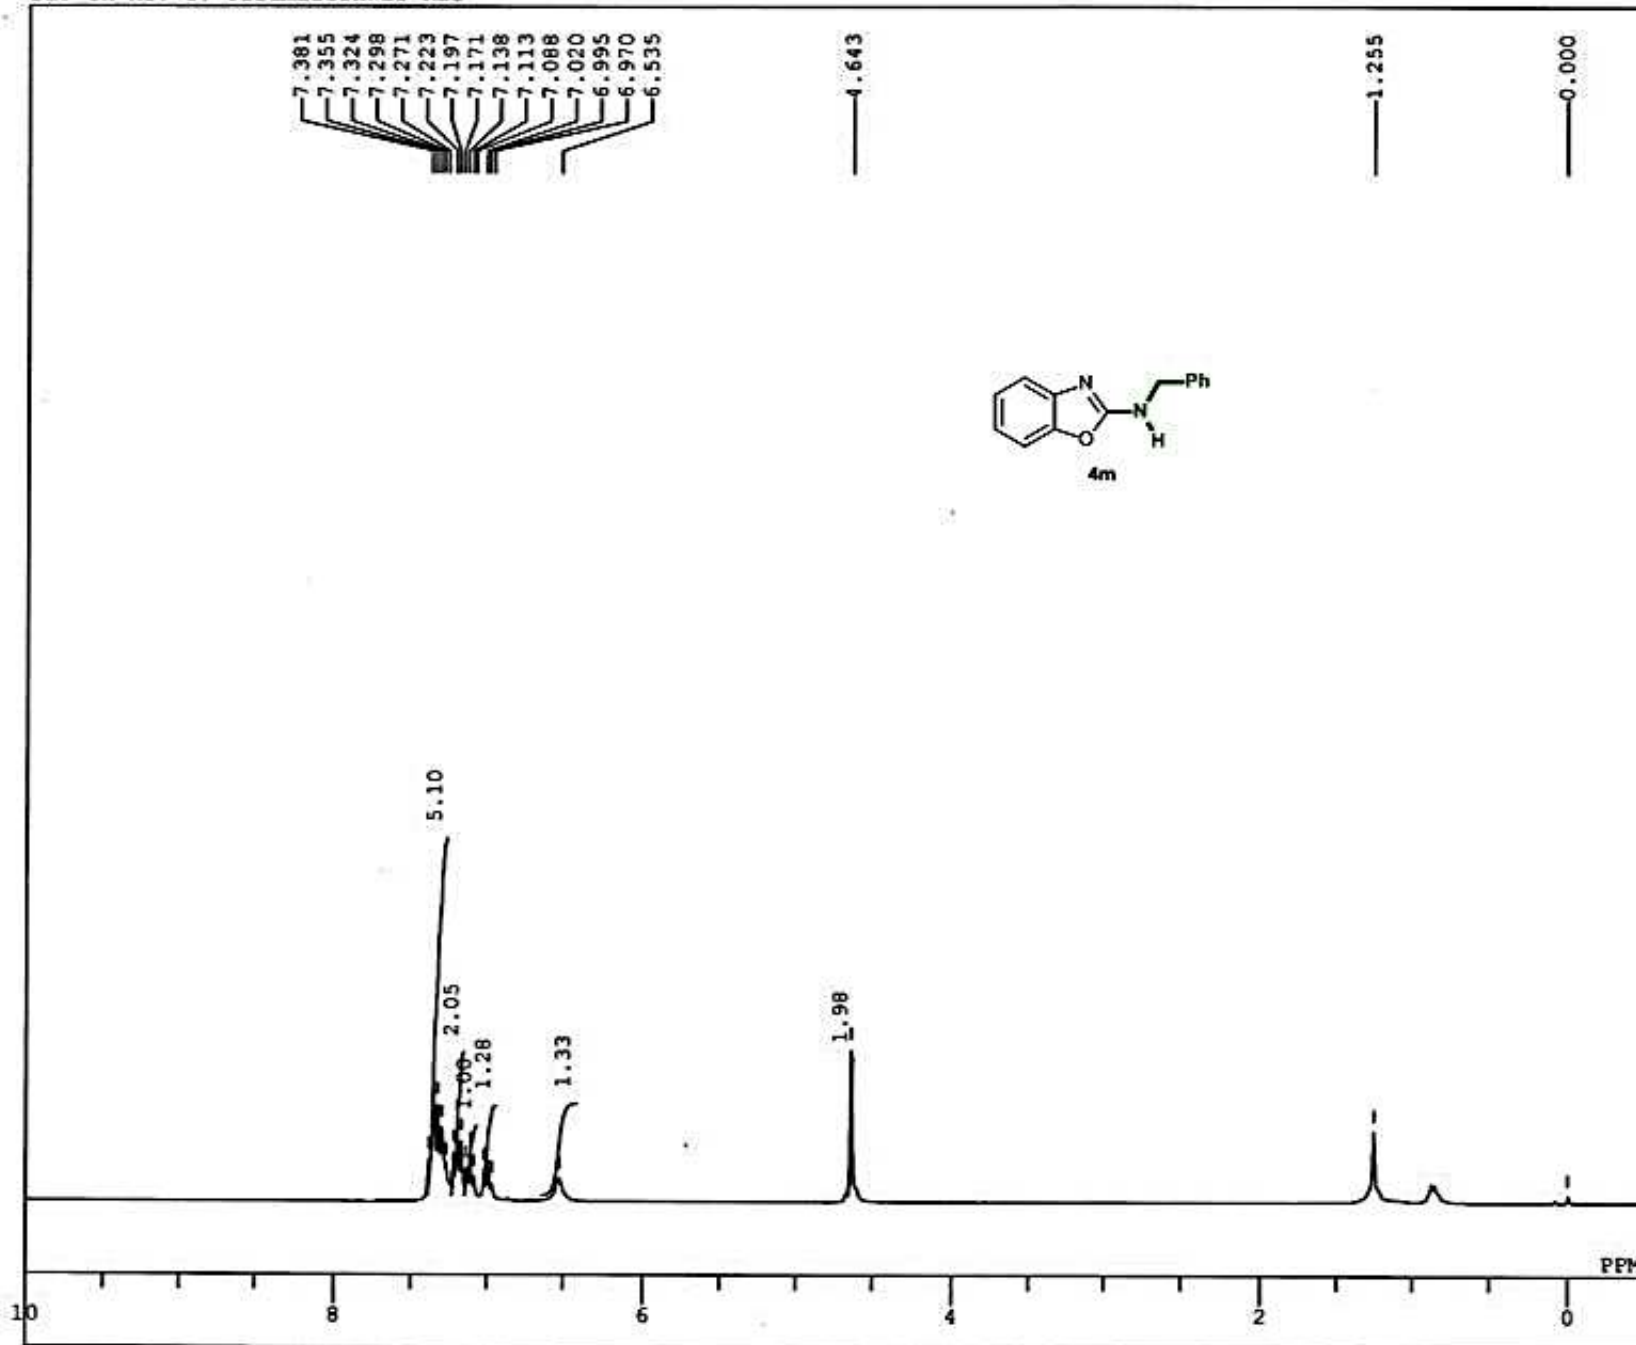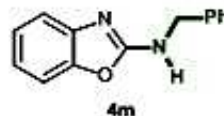

JEOL AL300 FTNMR  
CHEMISTRY DEPARTMENT  
Banaras Hindu University,  
VARANASI-221005

Operator : Nagendra Kumar  
Shishir Singh

DFILE C:\K.N. Singh,,I.T\BEP\_1H  
COMT BEP\_1H\_Mr. G. Tirumale:  
DATIM Fri Nov 16 16:14:56 20:  
OBNUC 1H  
EXMOD NON  
OBFRQ 300.40 MHz  
OBSET 130.00 KHz  
OBFIN 1150.0 Hz  
POINT 32768  
FREQU 9505.7 Hz  
SCANS 8  
ACQTM 3.447 sec  
PD 1.547 sec  
PW1 5.2 us  
IRNUC 1H  
CTEMP 18.6 c  
SLVNT CDCL3  
EXREF 0.00 ppm  
BF 1.20 Hz  
RGAIN 13

C:\K.N. Singh,,I.T\BEP\_13C\_als  
BEP 13C Mr. G. Tirumaleswar Rao

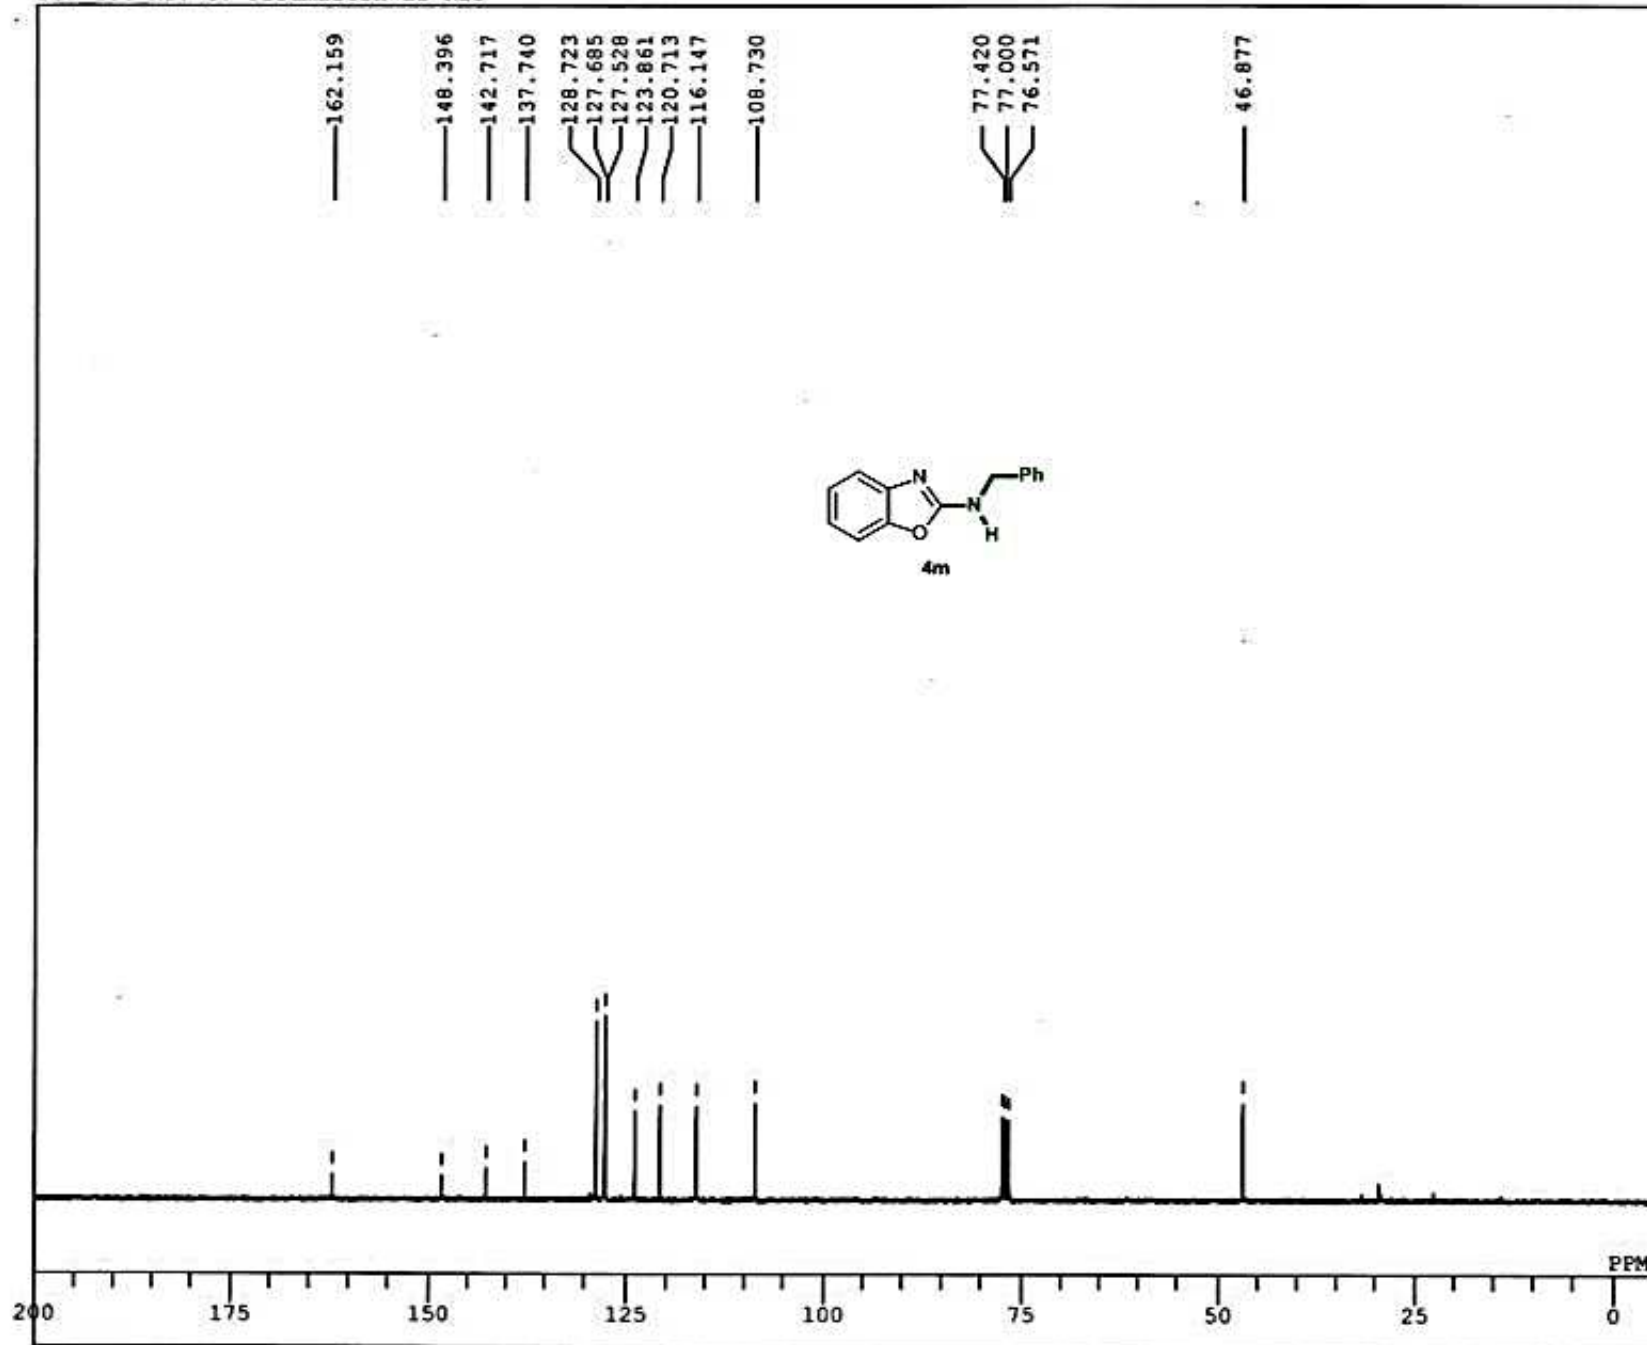

JEOL AL300 FTNMR  
CHEMISTRY DEPARTMENT  
Banaras Hindu University,  
VARANASI-221005

Operator : Nagendra Kumar  
Shishir Singh

DFILE C:\K.N. Singh,,I.T\BEP\_13C\_als  
COMNT BEP\_13C Mr. G. Tirumaleswar Rao  
DATIM Fri Nov 16 16:24:18 2012  
OBNUC 13C  
EXMOD BCM  
OBFRQ 75.45 MHz  
OBSET 127.30 KHz  
OBFIN 44.7 Hz  
POINT 32768  
FREQU 20408.1 Hz  
SCANS 119  
ACQTM 1.606 sec  
PD 1.394 sec  
PW1 6.0 us  
IRNUC 1H  
CTEMP 22.1 c  
SLVNT CDCL3  
EXREF 77.00 ppm  
BF 1.20 Hz  
RGAIN 23

C:\K.N. Singh,,I.T\DPB\_1H.als  
DPB 1H Mr.G.Tirumelswara Rai

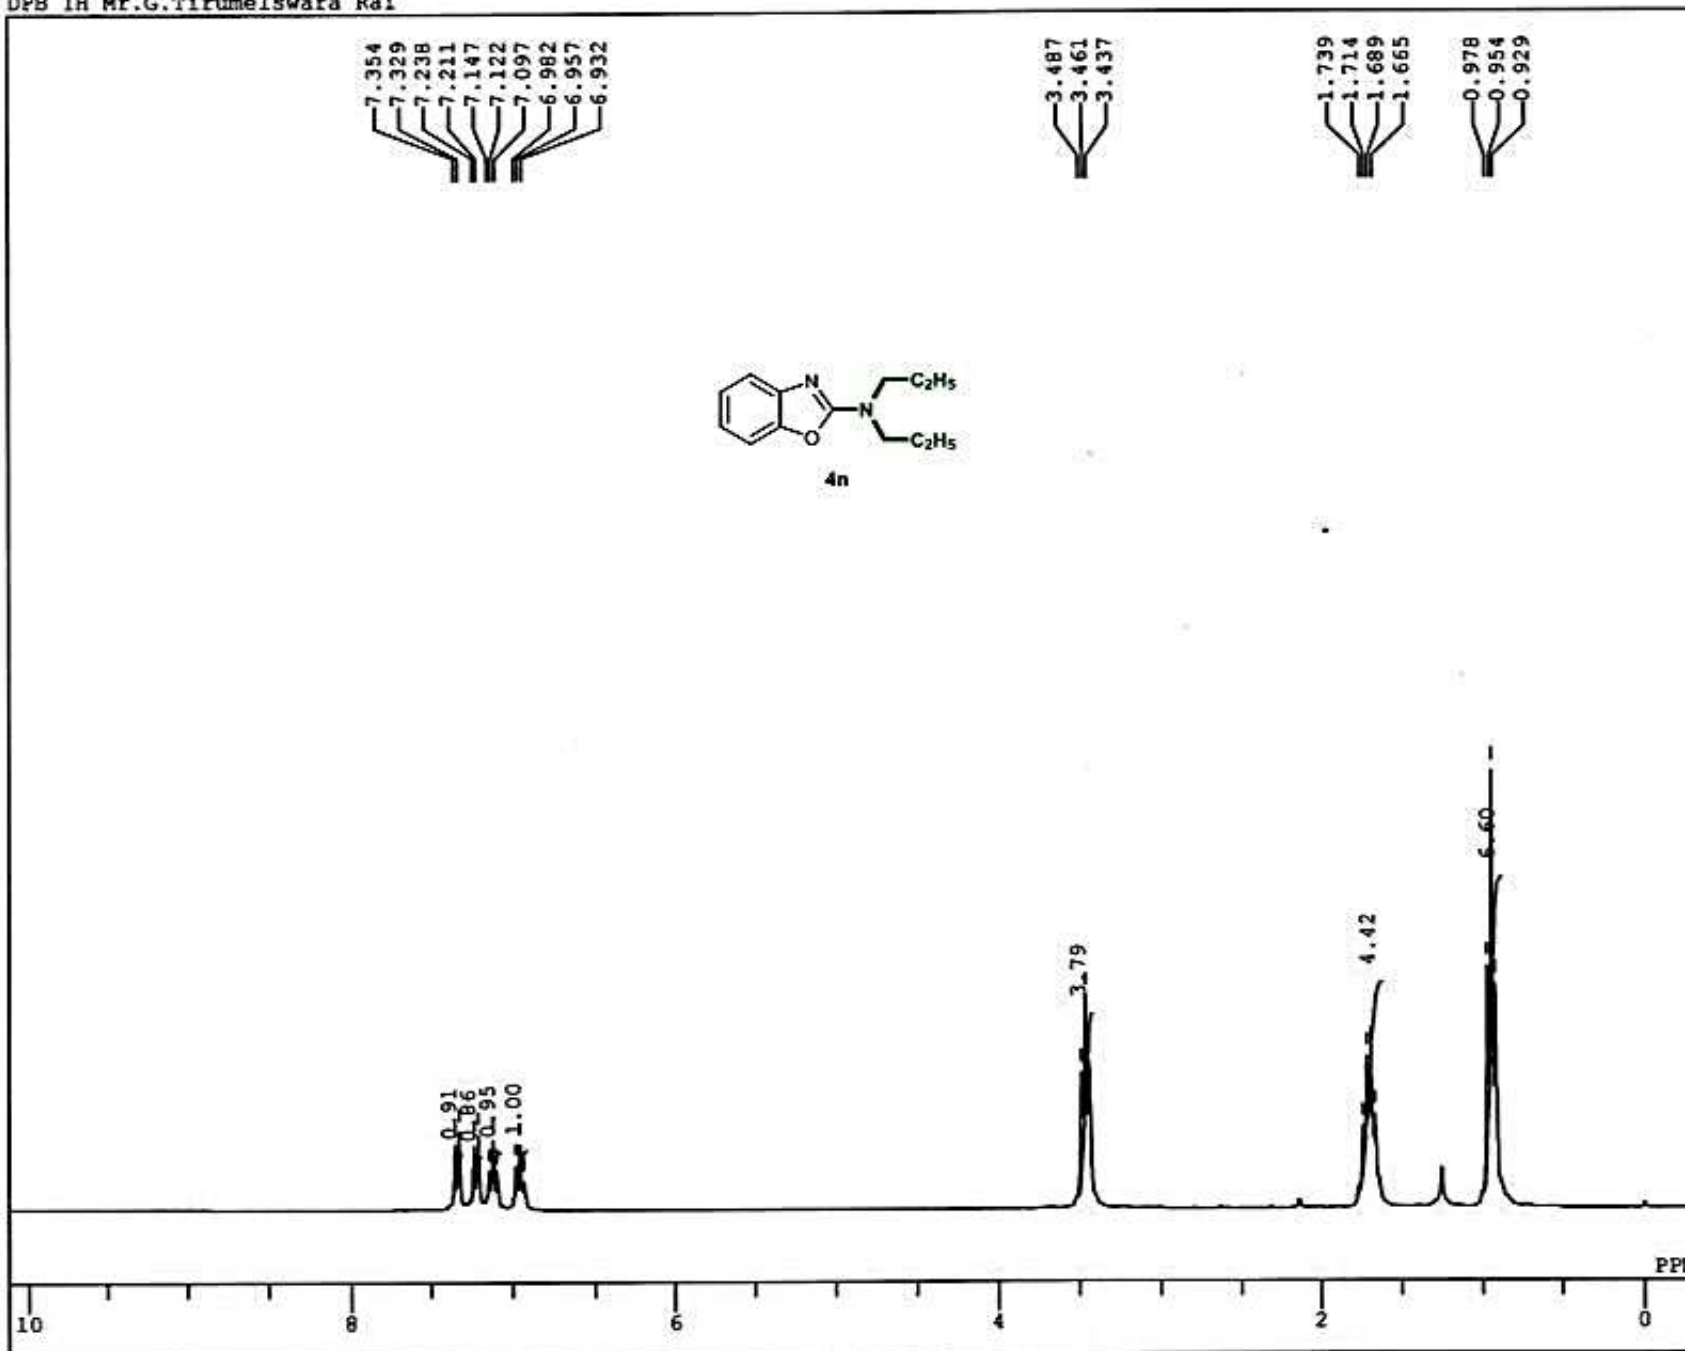

JEOL AL300 FTNMR  
CHEMISTRY DEPARTMENT  
Banaras Hindu University  
VARANASI-221005

Operator : Nagendra Kuma  
Shishir Singh

DFILE C:\K.N. Singh,,I.'  
COMNT DPB\_1H Mr.G.Tirum  
DATIM Thu Sep 06 17:45:  
OBNUC 1H  
EXMOD NON  
OBFRQ 300.40 MHz  
OBSET 130.00 KHz  
OBFIN 1150.0 Hz  
POINT 32768  
FREQU 6016.8 Hz  
SCANS 32  
ACQTM 5.446 sec  
PD 1.547 sec  
PW1 5.2 us  
IRNUC 1H  
CTEMP 19.5 c  
SLVNT CDCL3  
EXREF 0.00 ppm  
BF 1.20 Hz  
RGAIN 9

C:\K.N. Singh,,I.T\DPB\_13C.als  
DPB 1H Mr.G.Tirumelswara Rao

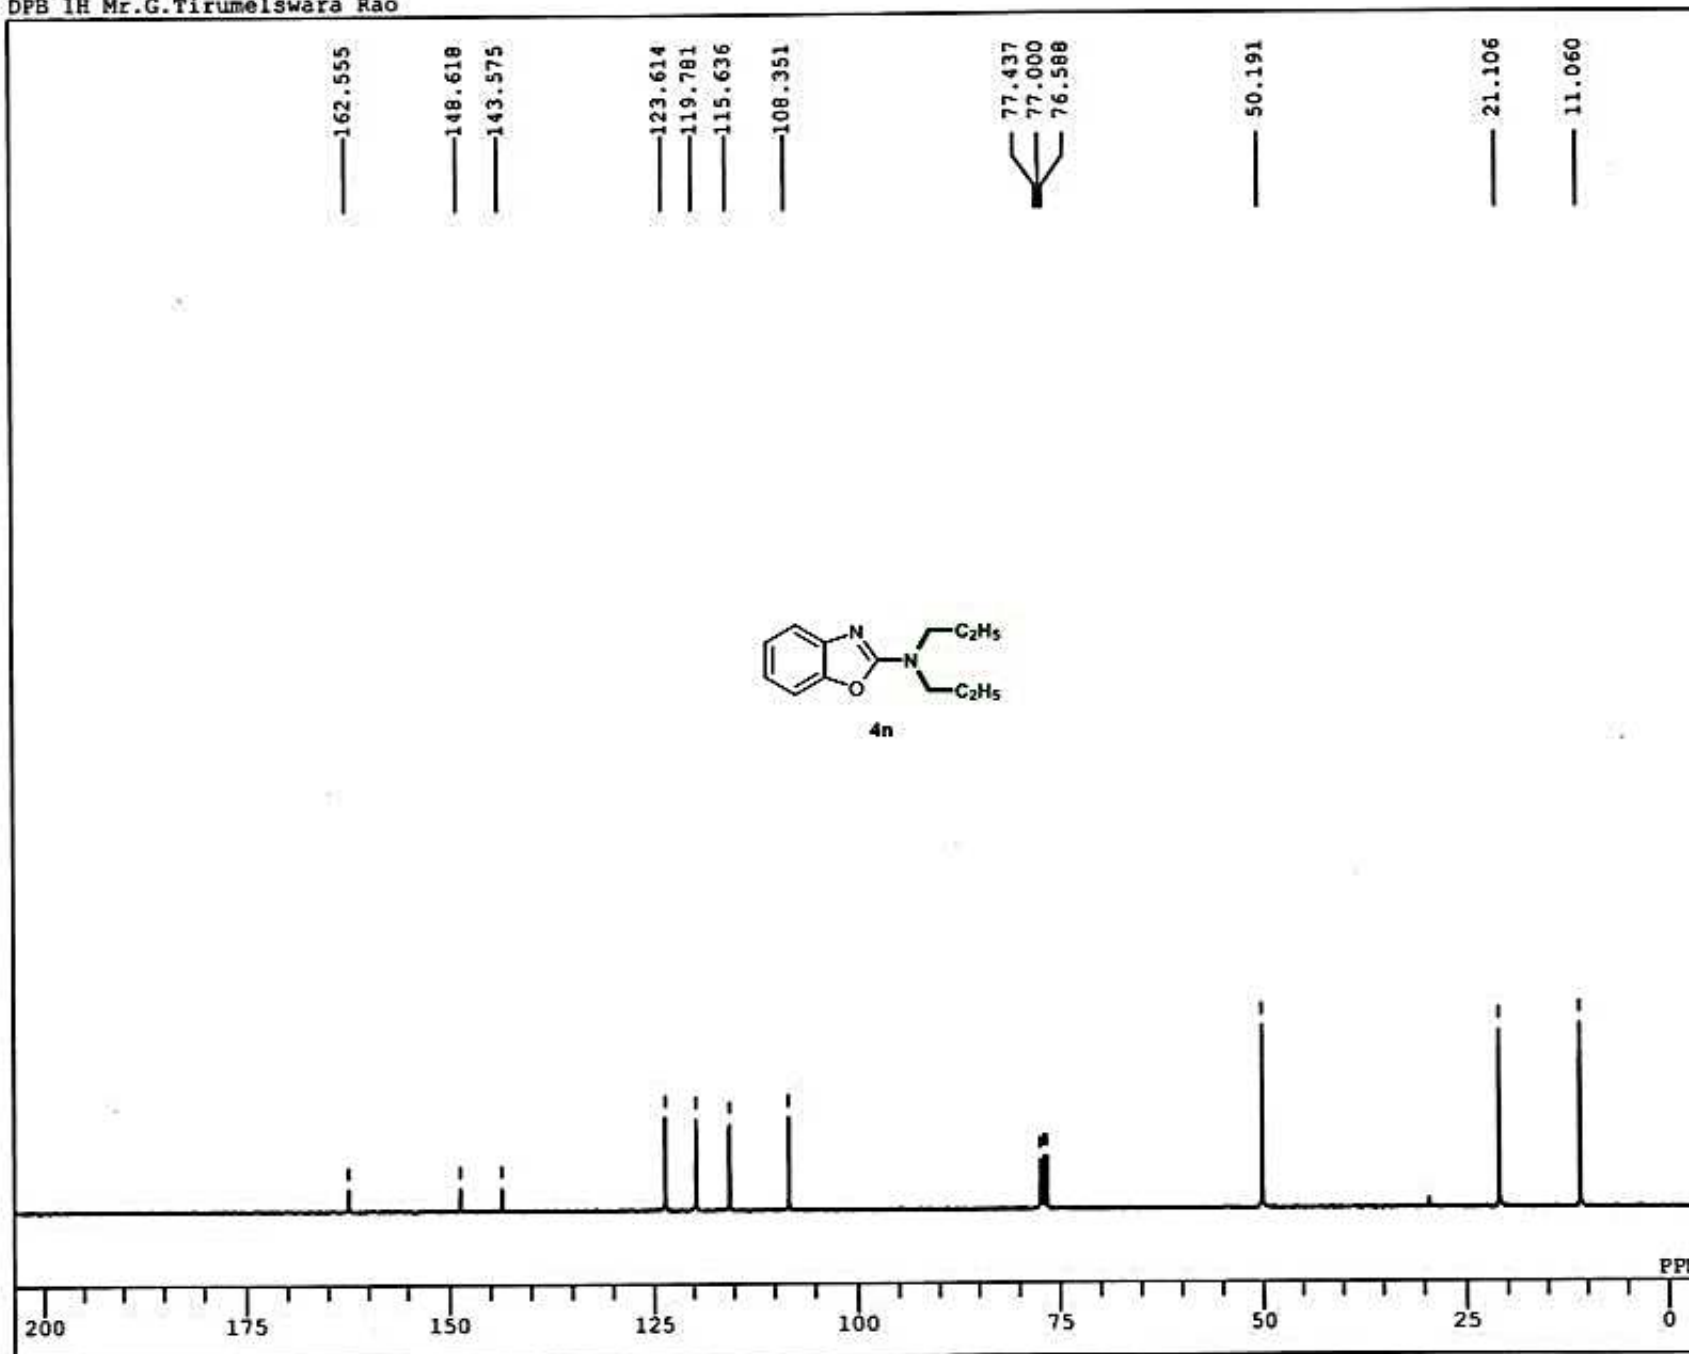

JEOL AL300 FTNMR  
CHEMISTRY DEPARTMENT  
Banaras Hindu University  
VARANASI-221005

Operator : Nagendra Kuma  
Shishir Singh

DFILE C:\K.N. Singh,,I.  
COMNT DPB\_1H Mr.G.Tirum  
DATIM Thu Sep 06 18:36:  
OBNUC 13C  
EXMOD BCM  
OBFREQ 75.45 MHz  
OBSET 127.30 KHz  
OBFIN 44.7 Hz  
POINT 32768  
FREQU 20408.1 Hz  
SCANS 1000  
ACQTM 1.606 sec  
PD 1.394 sec  
PW1 6.0 us  
IRNUC 1H  
CTEMP 19.1 c  
SLVNT CDCL3  
EXREF 77.00 ppm  
BF 1.20 Hz  
RGAIN 23



C:\WINNMR98\Data\4-MDE-II\_1H1NON\_E4.als  
4-MDE-II 1H Mr.A.Bharat Kumar

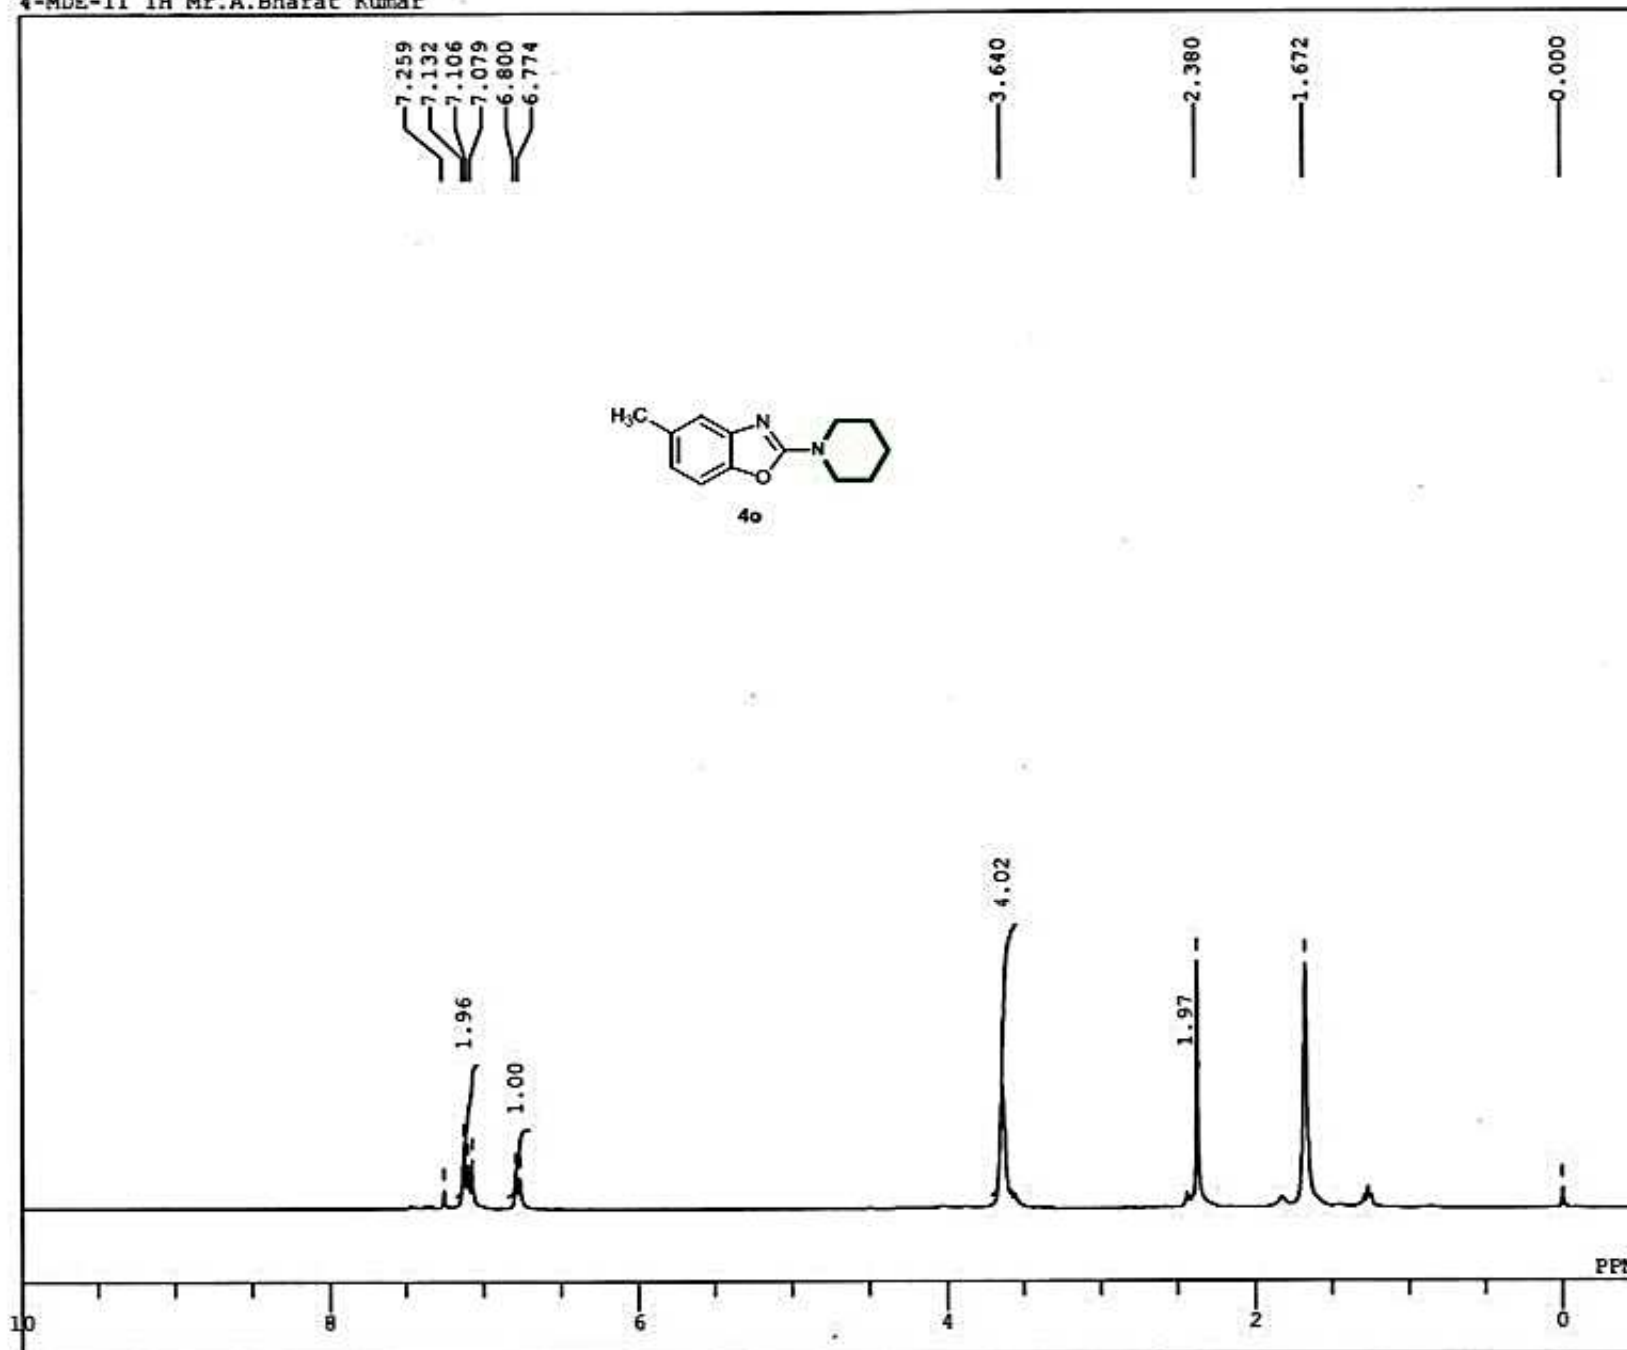

JEOL AL300 FTNMR  
CHEMISTRY DEPARTMENT  
Banaras Hindu University,  
VARANASI-221005

Operator : Nagendra Kumar  
Shishir Singh

DFILE C:\WINNMR98\Data\4-MDE-  
COMNT 4-MDE-II\_1H Mr.A.Bharat  
DATIM Fri Jan 04 13:00:49 20  
OBNUC 1H  
EXMOD NON  
OBFRQ 300.40 MHz  
OBSET 130.00 KHz  
OBFIN 1150.0 Hz  
POINT 32768  
FREQU 6016.8 Hz  
SCANS 32  
ACQTM 5.446 sec  
PD 1.547 sec  
PW1 5.2 us  
IRNUC 1H  
CTEMP 19.6 c  
SLVNT CDCL3  
EXREF 0.00 ppm  
BF 1.20 Hz  
RGAIN 17

C:\K.N. Singh,,I.T\4-MDE-II\_13C.als  
4-MDE-II 13C Mr.A.Bharat Kumar

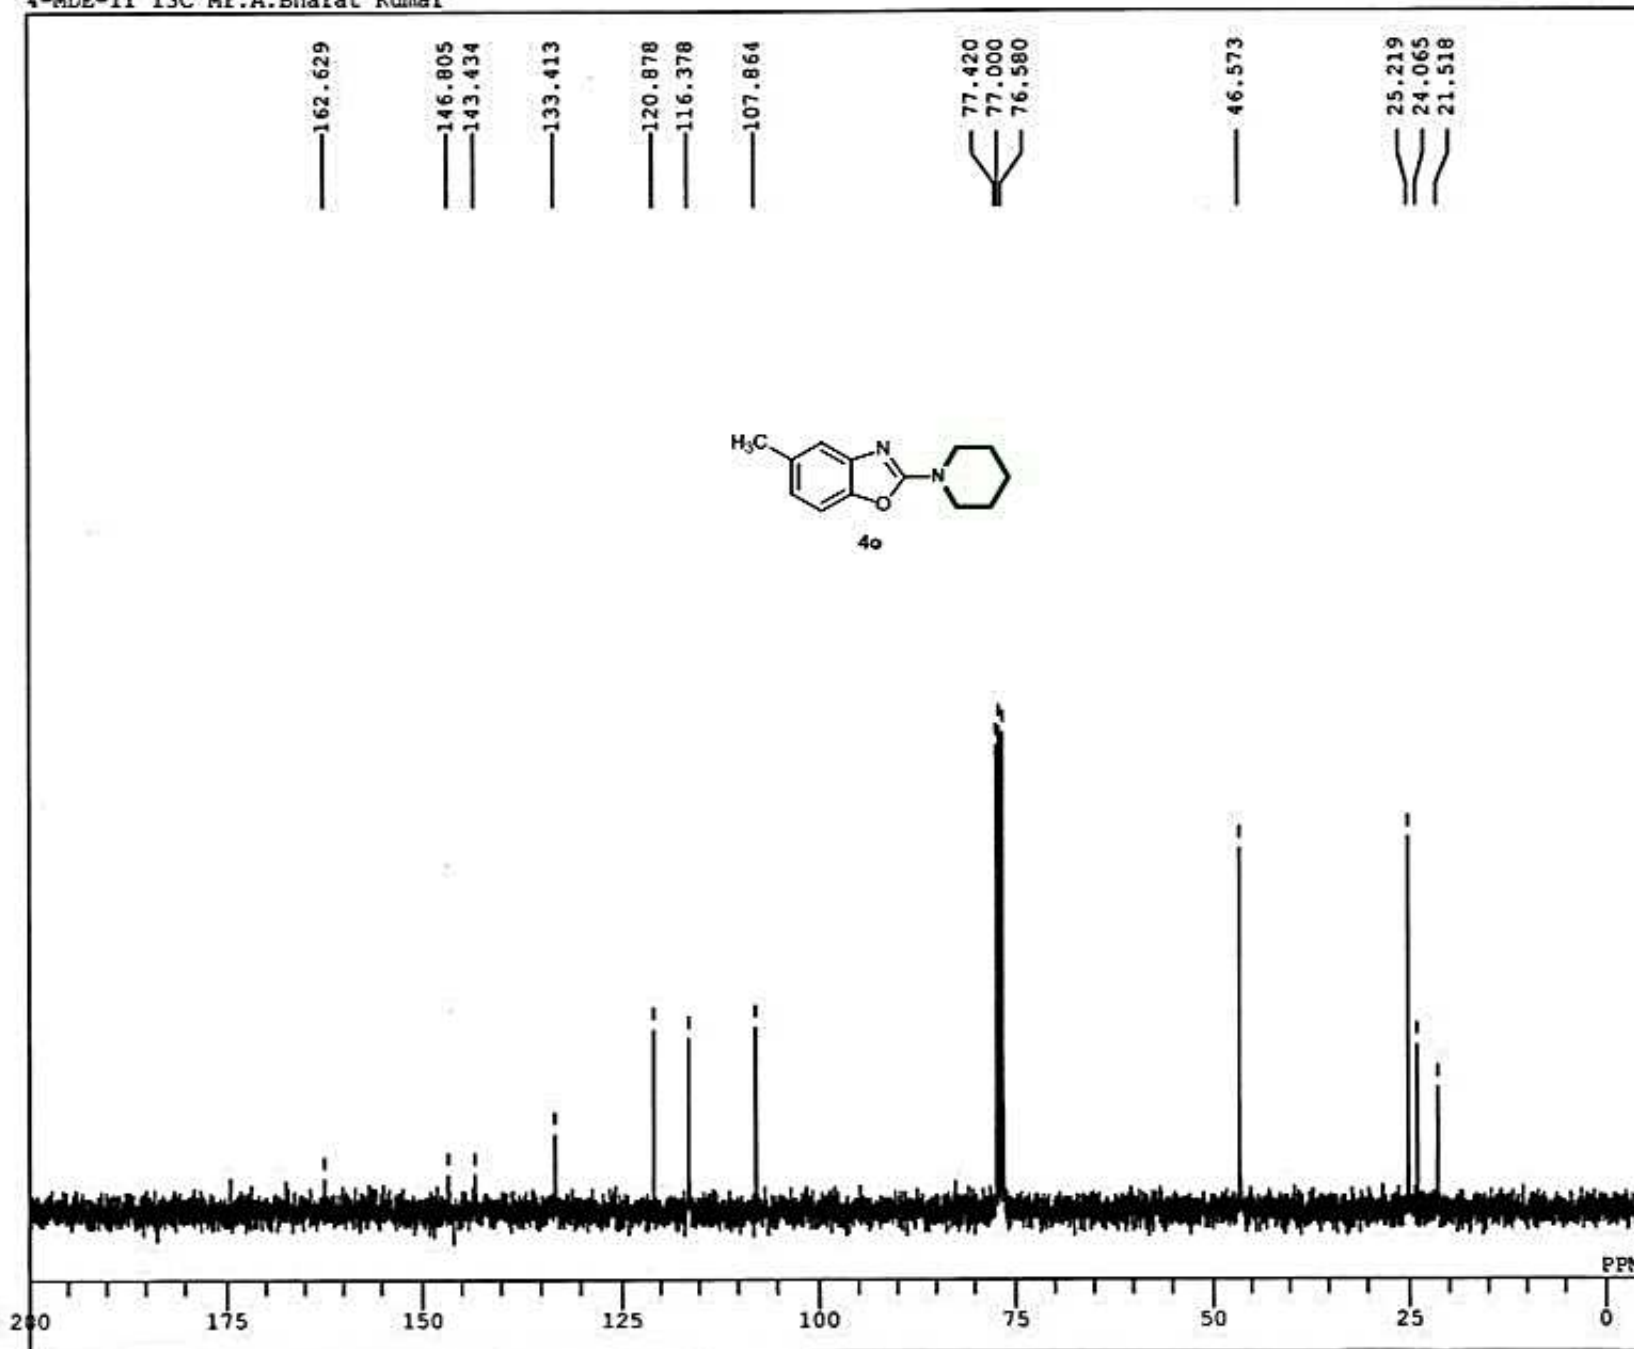

JEOL AL300 FTNMR  
CHEMISTRY DEPARTMENT  
Banaras Hindu University,  
VARANASI-221005

Operator : Nagendra Kumar  
Shishir Singh

DFILE C:\K.N. Singh,,I.T\4-MI  
COMNT 4-MDE-II\_13C Mr.A.Bharat  
DATIM Fri Jan 04 13:25:37 2013  
OBNUC 13C  
EXMOD BCM  
OBFRQ 75.45 MHz  
OBSET 127.30 KHz  
OBFIN 44.7 Hz  
POINT 32768  
FREQU 20408.1 Hz  
SCANS 117  
ACQTM 1.606 sec  
PD 1.394 sec  
PW1 6.0 us  
IRNUC 1H  
CTEMP 20.7 c  
SLVNT CDCL3  
EXREF 77.00 ppm  
BF 1.20 Hz  
RGAIN 25

B<sub>40</sub>



C:\K.N. Singh,,I.T\4-MDE\_1H.als  
4-MDE 1H Mr.G.Tirumaleswara Rao

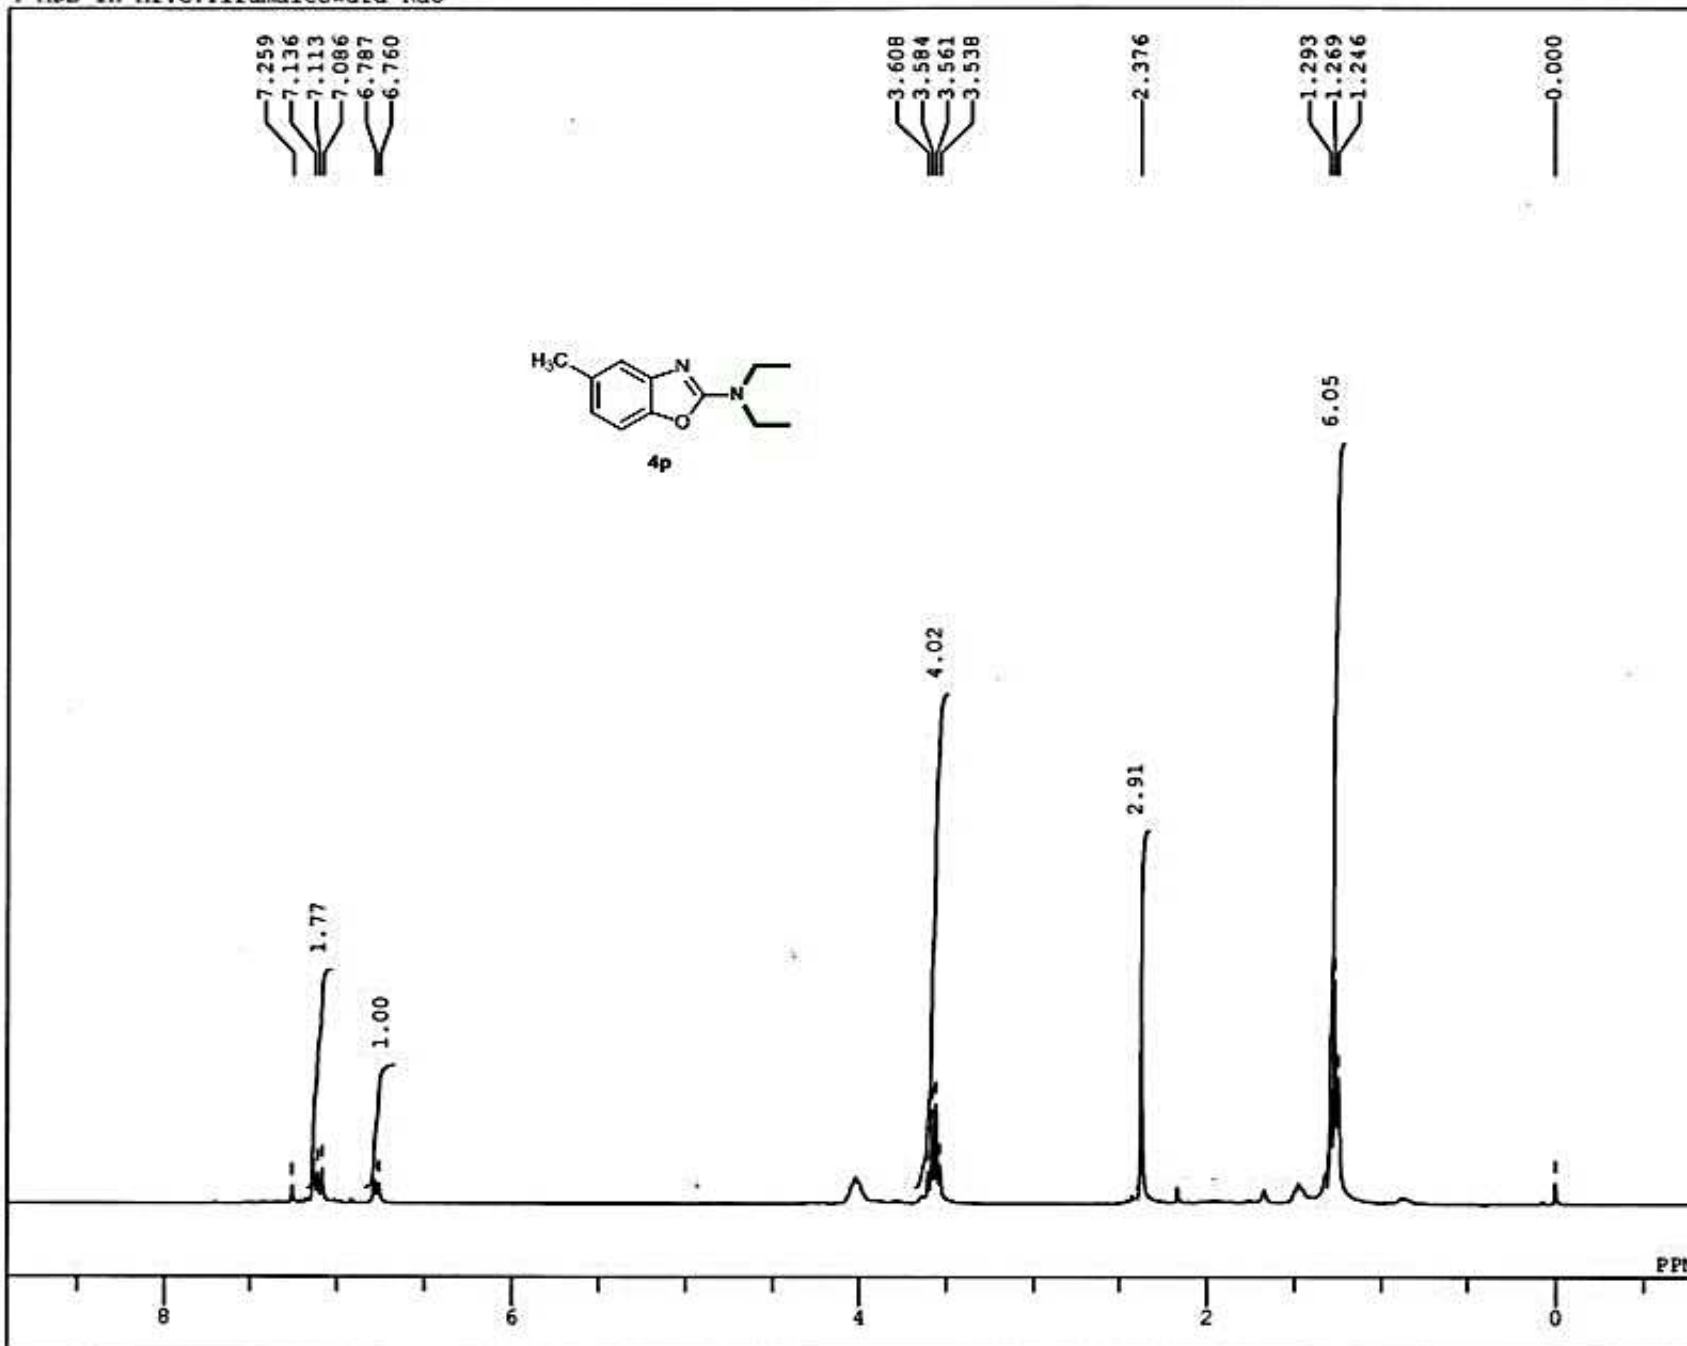

JEOL AL300 FTNMR  
CHEMISTRY DEPARTMENT  
Banaras Hindu University  
VARANASI-221005

Operator : Nagendra Kuma  
Shishir Singh

DFILE C:\K.N. Singh,,I.'  
COMNT 4-MDE\_1H Mr.G.Tir  
DATIM Mon Dec 17 12:17:  
OBNUC 1H  
EXMOD NON  
OBFRQ 300.40 MHz  
OBSET 130.00 KHz  
OBFIN 1150.0 Hz  
POINT 32768  
FREQU 9505.7 Hz  
SCANS 8  
ACQTM 3.447 sec  
PD 1.547 sec  
PW1 5.2 us  
IRNUC 1H  
CTEMP 21.1 c  
SLVNT CDCL3  
EXREF 0.00 ppm  
BF 1.20 Hz  
RGAIN 17

C:\K.N. Singh,,I.T\4-MDE\_13C\_.als  
4-MDE 13C Mr.G.Tirumaleswara Rao

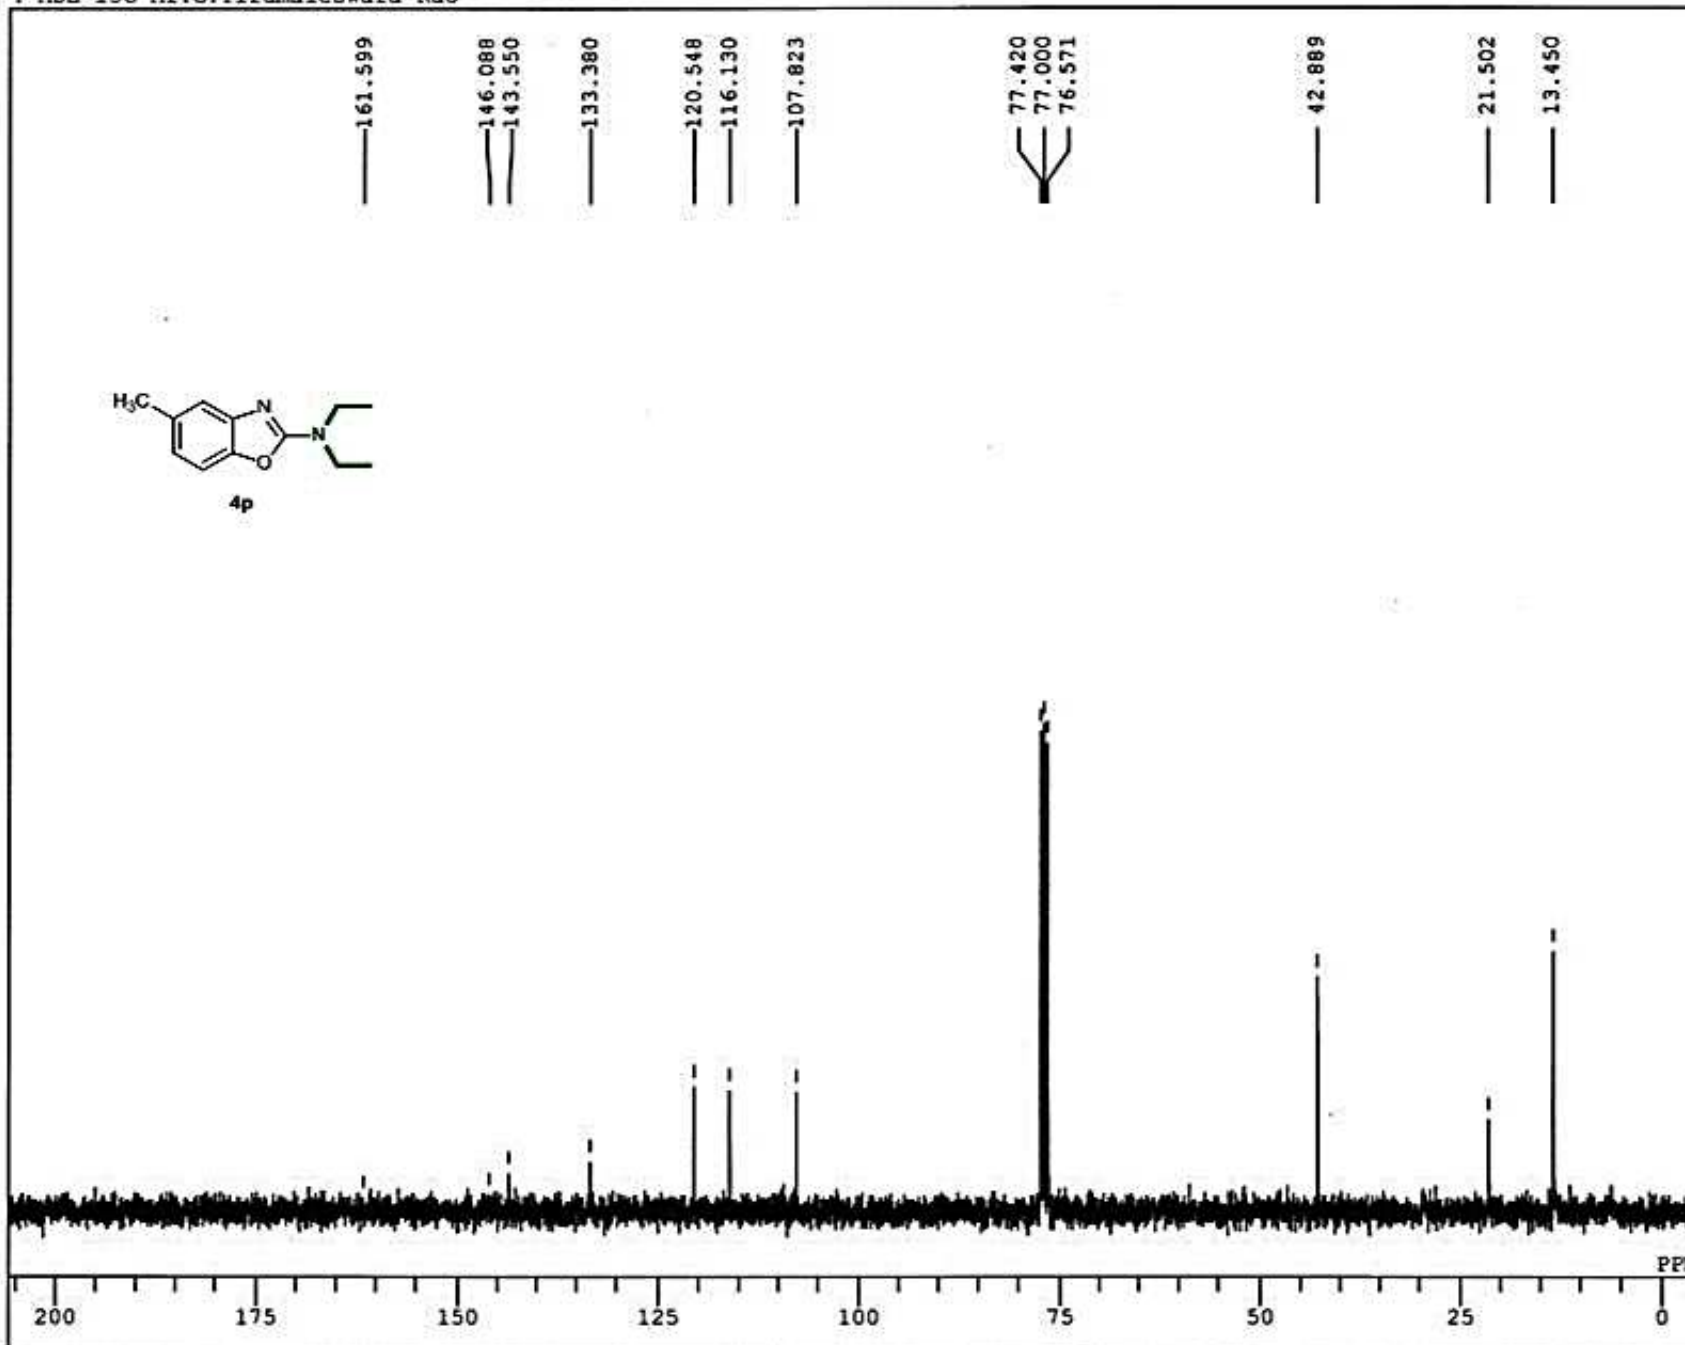

JEOL AL300 FTNMR  
CHEMISTRY DEPARTMENT  
Banaras Hindu University  
VARANASI-221005

Operator : Nagendra Kuma  
Shishir Singh

DFILE C:\K.N. Singh,,I.  
COMNT 4-MDE\_13C Mr.G.Ti  
DATIM Mon Dec 17 12:25:  
OBNUC 13C  
EXMOD BCM  
OBFRQ 75.45 MHz  
OBSET 127.30 KHz  
OBFIN 44.7 Hz  
POINT 32768  
FREQU 20408.1 Hz  
SCANS 104  
ACQTM 1.606 sec  
PD 1.394 sec  
PW1 6.0 us  
IRNUC 1H  
CTEMP 25.3 c  
SLVNT CDCL3  
EXREF 77.00 ppm  
BF 1.20 Hz  
RGAIN 24

C:\K.N. Singh,,I.T\4-MDB\_1H.als  
4-MDB 1H Mr.A.Bharathi Kumar

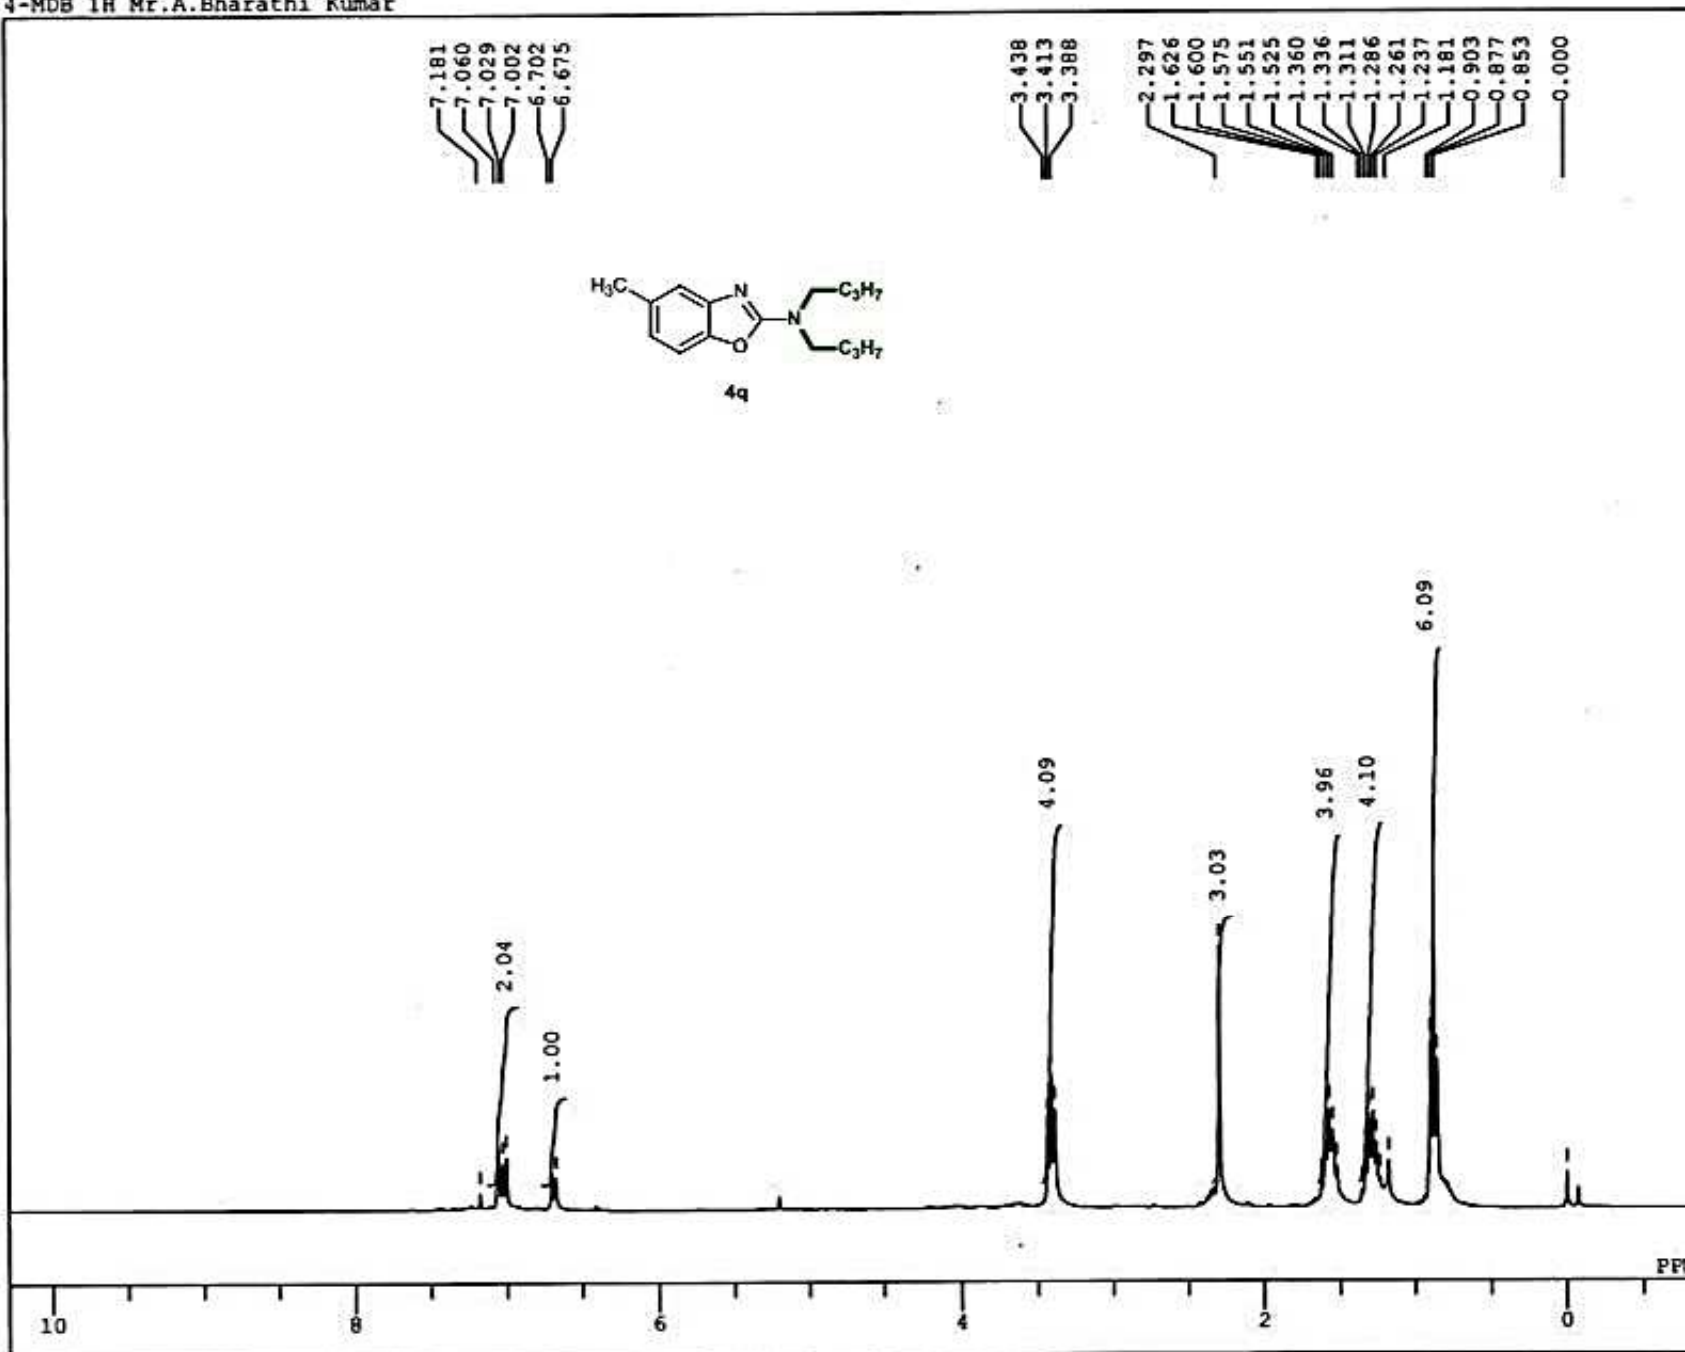

JEOL AL300 FTNMR  
CHEMISTRY DEPARTMENT  
Banaras Hindu University  
VARANASI-221005

Operator : Nagendra Kuma  
Shishir Singh

DFILE C:\K.N. Singh,,I.  
COMNT 4-MDB 1H Mr.A.Bha  
DATIM Wed Dec 05 15:26:  
OBNUC 1H  
EXMOD NON  
OBFREQ 300.40 MHz  
OBSET 130.00 KHz  
OBFIN 1150.0 Hz  
POINT 32768  
FREQU 9505.7 Hz  
SCANS 30  
ACQTM 3.447 sec  
PD 1.547 sec  
PW1 5.2 us  
IRNUC 1H  
CTEMP 22.1 c  
SLVNT CDCL3  
EXREF 0.00 ppm  
BF 1.20 Hz  
RGAIN 13

C:\WINNMR98\COMMON\DEFAULT.ALS  
4-MDB 13C Mr.A.Bharathi Kumar

JEOL AL300 FTNMR  
CHEMISTRY DEPARTMENT  
Banaras Hindu University,  
VARANASI-221005

Operator : Nagendra Kumar  
Shishir Singh

DFILE C:\WINNMR98\COMMON\DEI  
COMNT 4-MDB\_13C Mr.A.Bharath:  
DATIM Wed Dec 05 15:21:14 20:  
OBNUC 13C  
EXMOD BCM  
OBFRQ 75.45 MHz  
OBSET 127.30 KHz  
OBFIN 44.7 Hz  
POINT 32768  
FREQU 20408.1 Hz  
SCANS 117  
ACQTM 1.606 sec  
PD 1.394 sec  
PW1 6.0 us  
IRNUC 1H  
CTEMP 23.1 c  
SLVNT CDCL3  
EXREF 77.00 ppm  
BF 1.20 Hz  
RGAIN 24

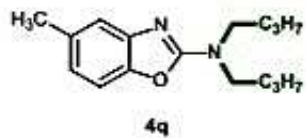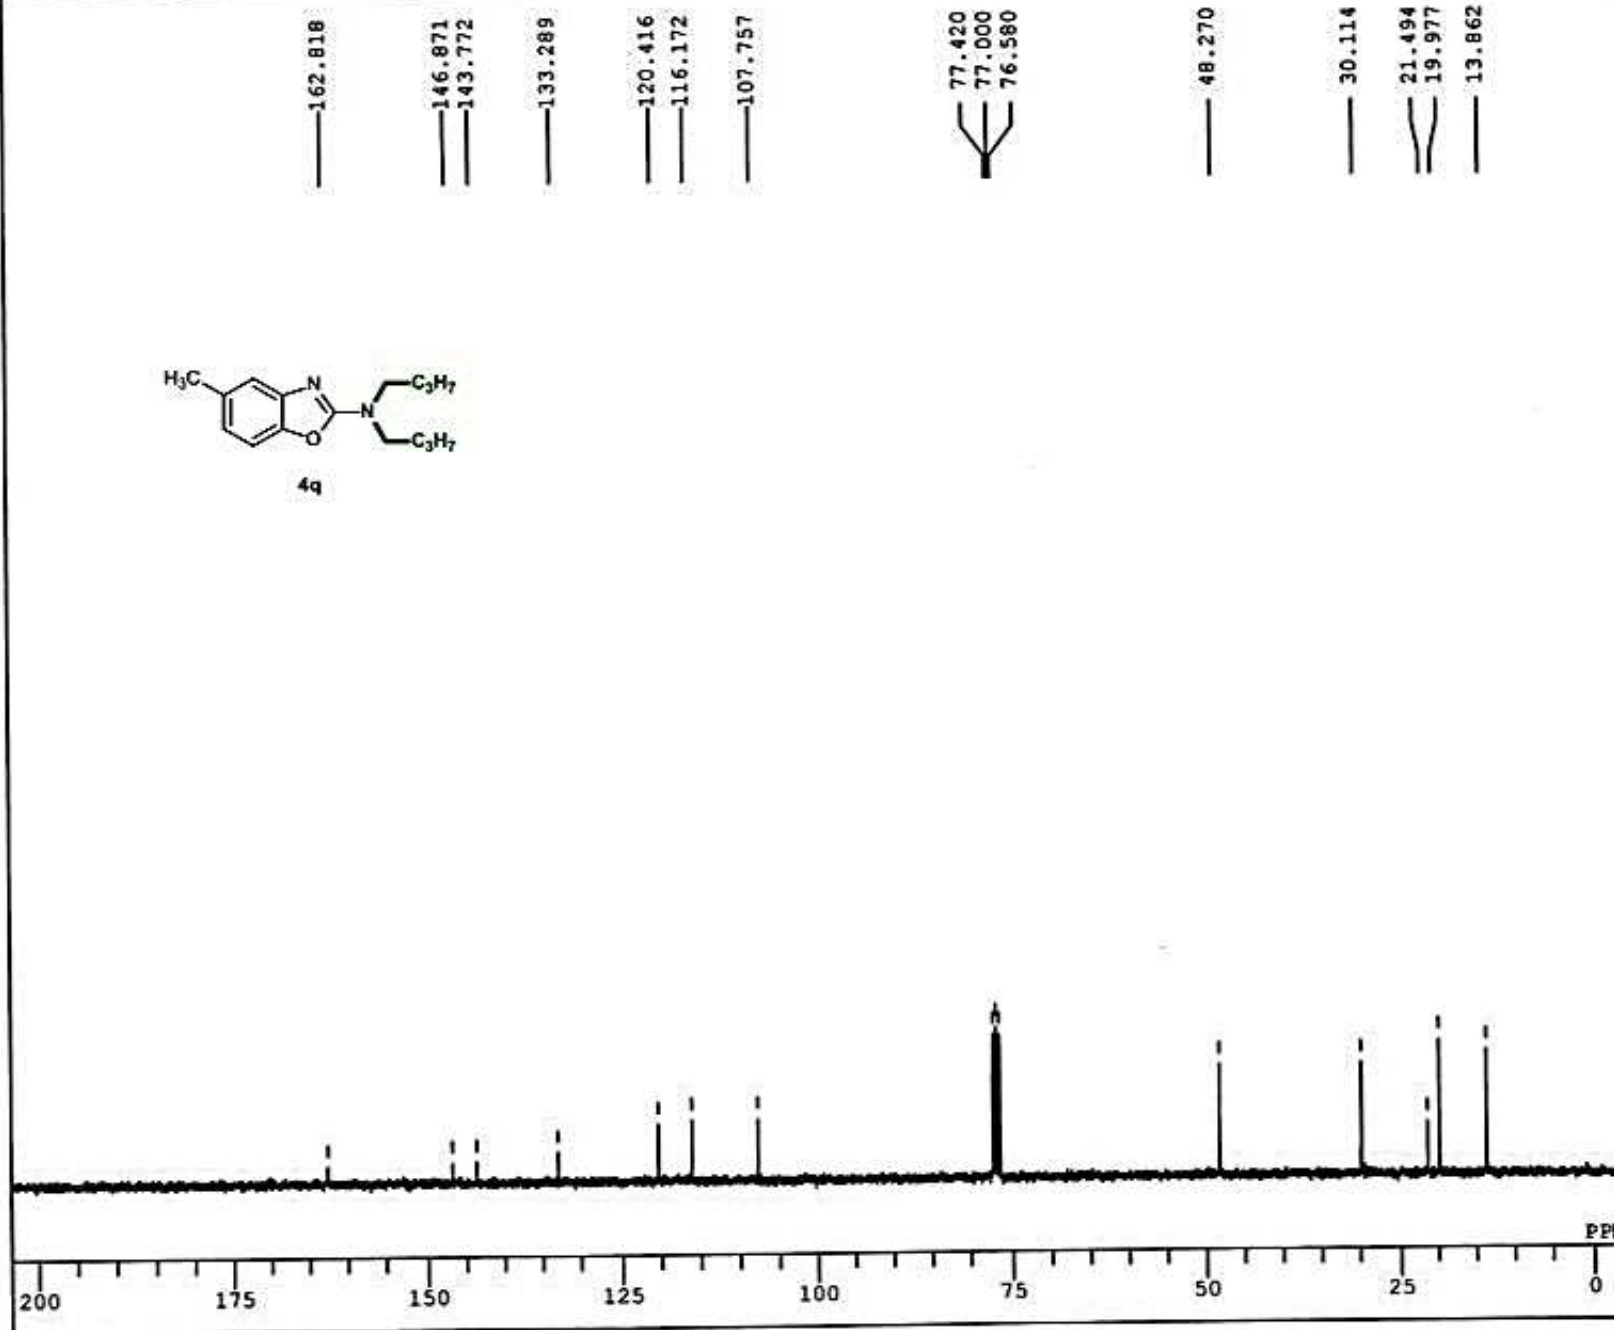

B<sub>44</sub>

C:\K.N. Singh,,I.T\4-NM 1H.als  
4-NM 1H Mr.A.Bharat Kumar

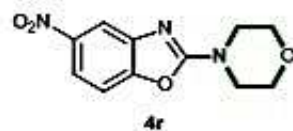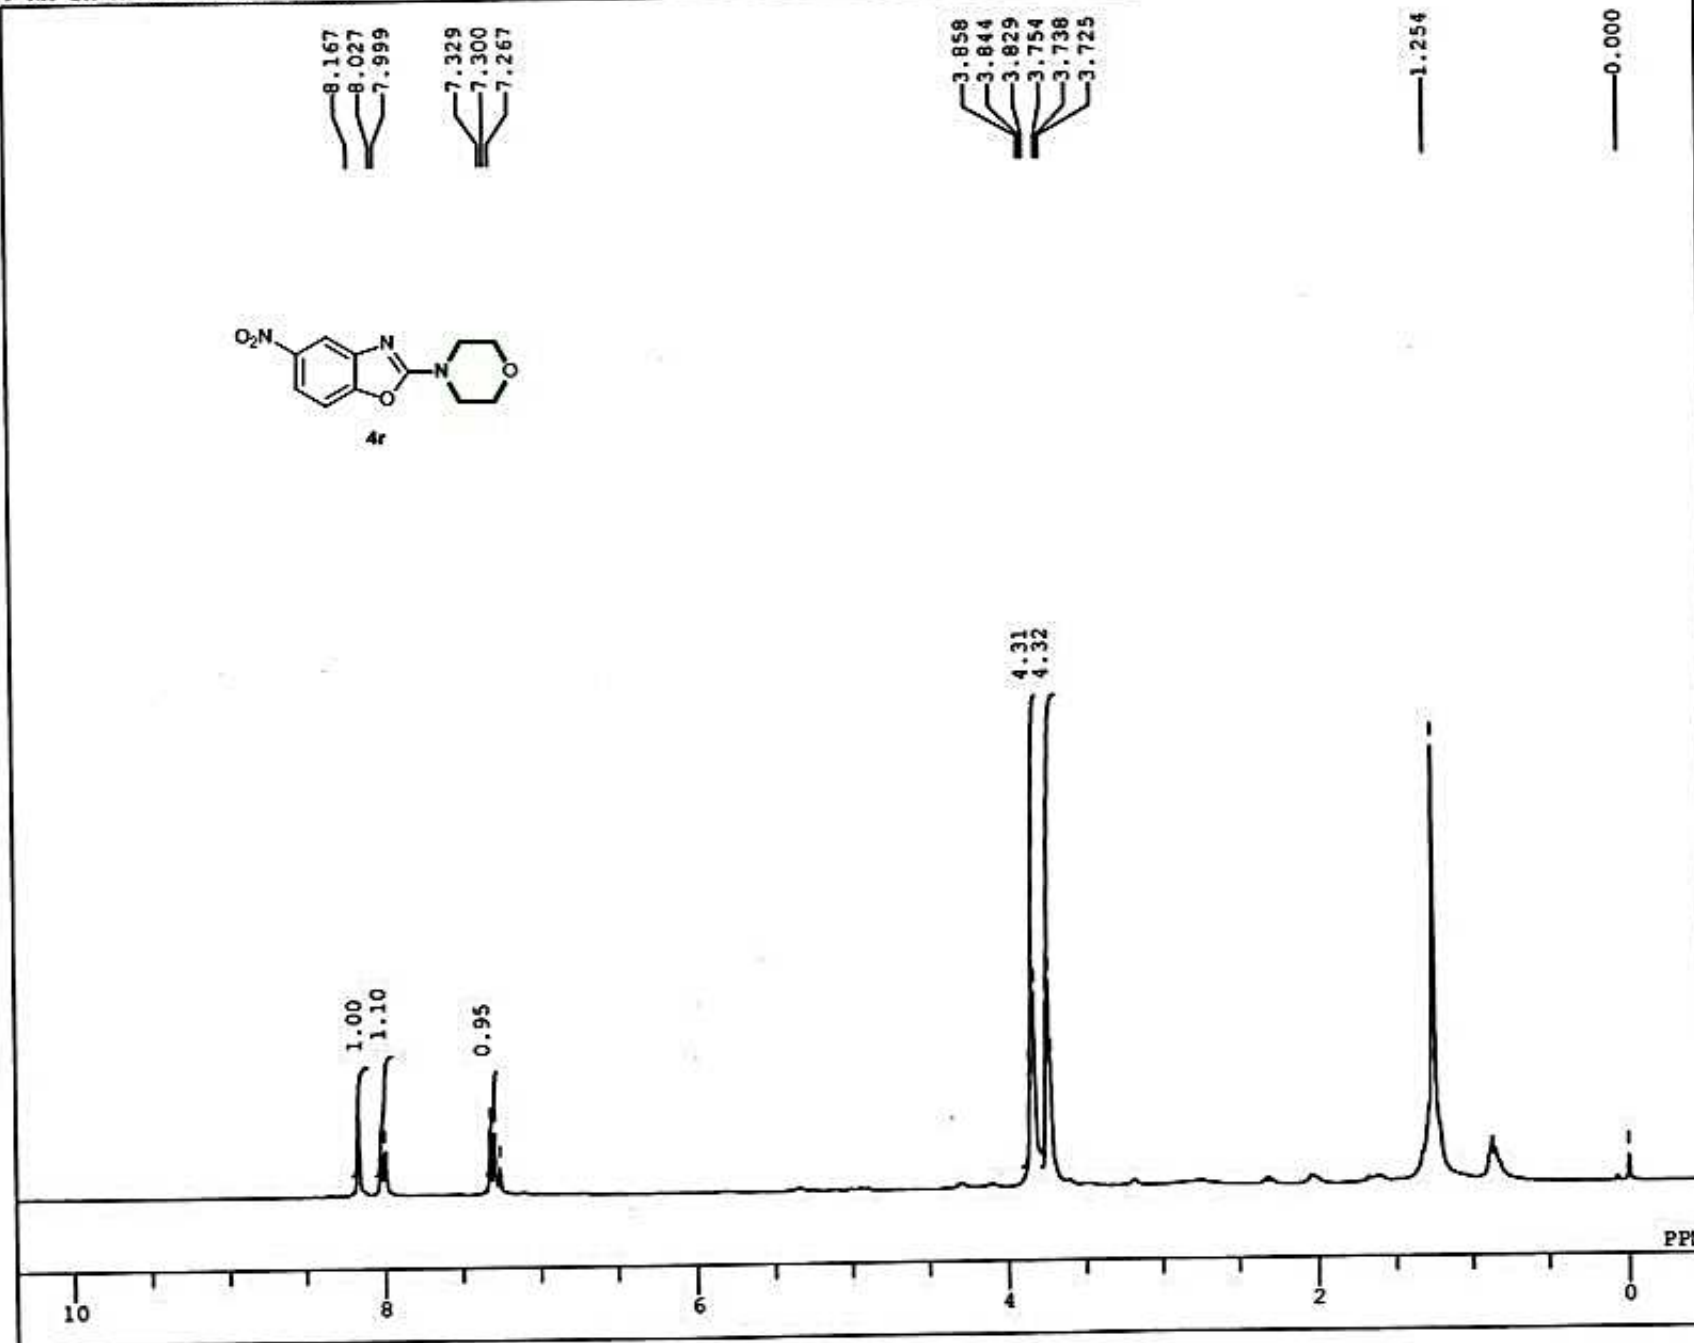

JEOL AL300 FTNMR  
CHEMISTRY DEPARTMENT  
Banaras Hindu University  
VARANASI-221005

Operator : Nagendra Kuma  
Shishir Singh

DFILE C:\K.N. Singh,,I.  
COMNT 4-NM 1H Mr.A.Bhar.  
DATIM Wed Oct 03 12:55:  
OBNUC 1H  
EXMOD NON  
OBFRQ 300.40 MHz  
OBSET 130.00 KHz  
OBFIN 1150.0 Hz  
POINT 32768  
FREQU 9505.7 Hz  
SCANS 17  
ACQTM 3.447 sec  
PD 1.547 sec  
PW1 5.2 us  
IRNUC 1H  
CTEMP 22.4 c  
SLVNT CDCL3  
EXREF 0.00 ppm  
BF 1.20 Hz  
RGAIN 15

B<sub>45</sub>

C:\WINNMR98\COMMON\\_DEFAULT.ALS  
4-NM ~~Dr~~ Mr.A.Bharat Kumar

JEOL AL300 FTNMR  
CHEMISTRY DEPARTMENT  
Banaras Hindu University,  
VARANASI-221005

Operator : Nagendra Kumar  
Shishir Singh

DFILE C:\WINNMR98\COMMON\\_DEFAULT.  
COMNT 4-NM\_1H\_Mr.A.Bharat\_Kumar  
DATIM Wed Oct 03 12:51:05 2012  
OBNUC 13C  
EXMOD BCM  
OBFRQ 75.45 MHz  
OBSET 127.30 KHz  
OBFIN 44.7 Hz  
POINT 32768  
FREQU 20408.1 Hz  
SCANS 110  
ACQTM 1.606 sec  
PD 1.394 sec  
PW1 6.0 us  
IRNUC 1H  
CTEMP 20.6 c  
SLVNT CDCL3  
EXREF 77.00 ppm  
BF 1.20 Hz  
RGAIN 25

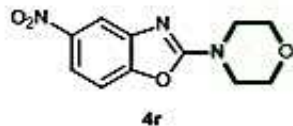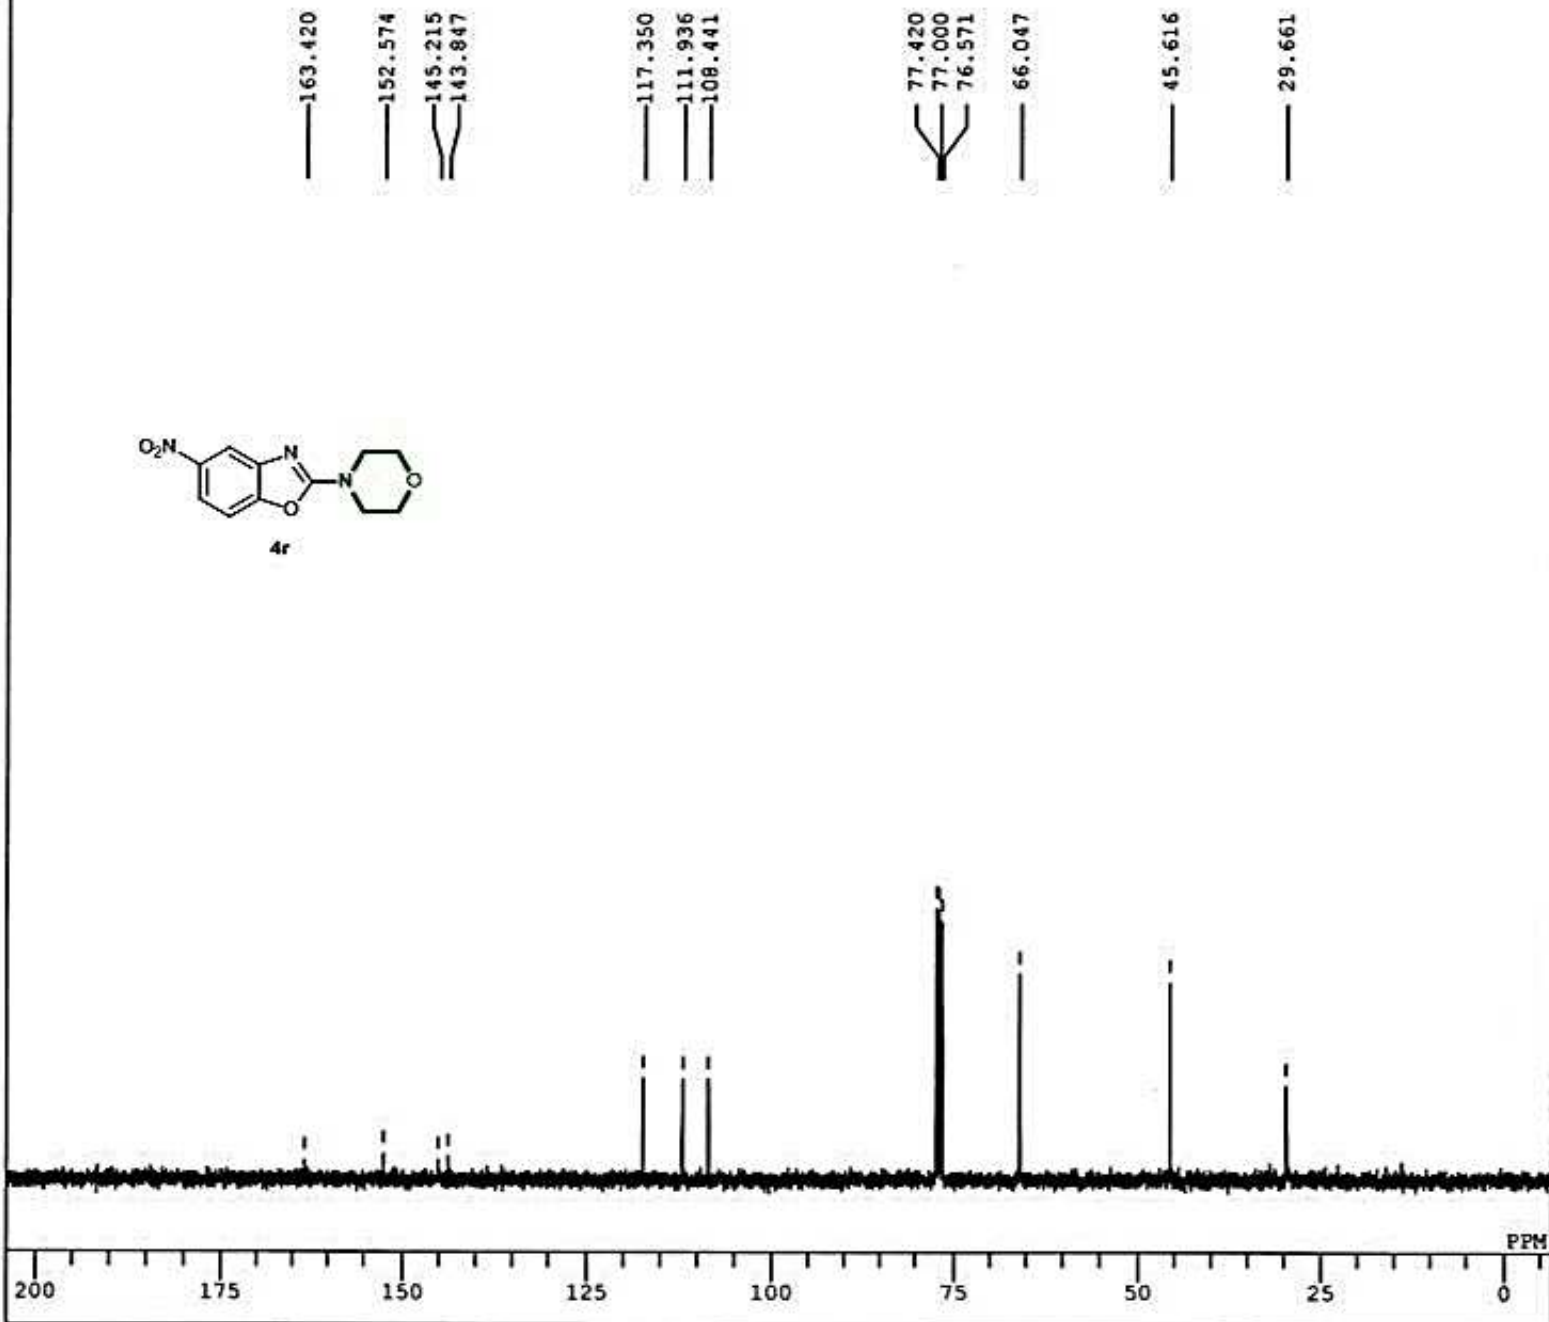

B<sub>46</sub>



C:\K.N. Singh,,I.T\4-NDE 1H.als  
4-NDE 1H Mr. G. Tirumaleshwara Rao

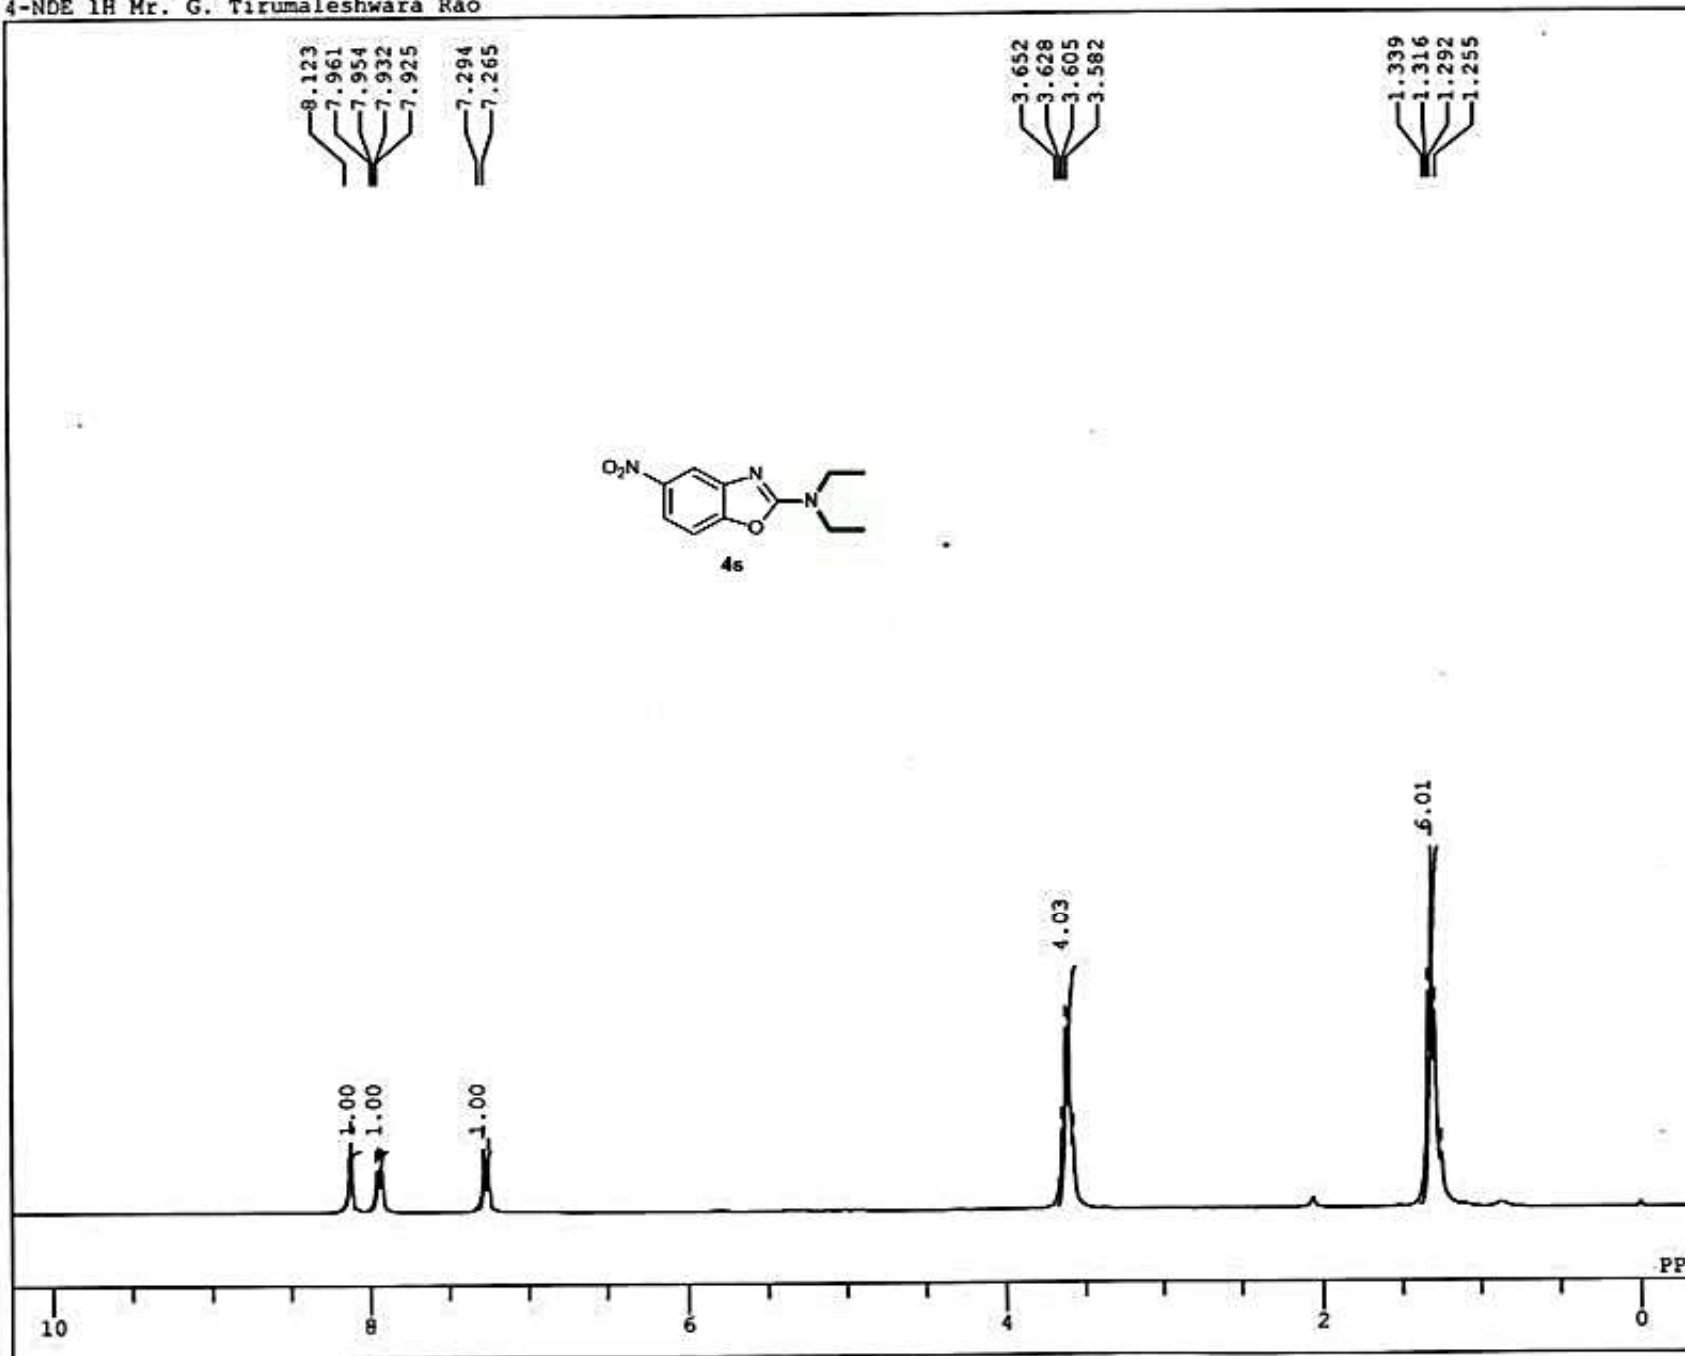

JEOL AL300 FTNMR  
CHEMISTRY DEPARTMENT  
Banaras Hindu University  
VARANASI-221005

Operator : Nagendra Kuma  
Shishir Singh

DFILE C:\K.N. Singh,,I.'  
COMNT 4-NDE 1H Mr. G. T  
DATIM Tue Nov 06 11:58:  
OBNUC 1H  
EXMOD NON  
OBFRQ 300.40 MHz  
OBSET 130.00 KHz  
OBFIN 1150.0 Hz  
POINT 32768  
FREQU 9505.7 Hz  
SCANS 16  
ACQTM 3.447 sec  
PD 1.547 sec  
PW1 5.2 us  
IRNUC 1H  
CTEMP 20.3 c  
SLVNT CDCL3  
EXREF 0.00 ppm  
BF 1.20 Hz  
RGAIN 10



C:\WINNMR98\COMMON\\_DEFAULT.ALS  
4-NDE 13C Mr. G. Tirumaleshvara Rao

JEOL AL300 FTNMR  
CHEMISTRY DEPARTMENT  
Banaras Hindu University,  
VARANASI-221005

Operator : Nagendra Kumar  
Shishir Singh

DFILE C:\WINNMR98\COMMON\\_DEFAULT.  
COMNT 4-NDE\_13C Mr. G. Tirumaleshw  
DATIM Tue Nov 06 12:19:54 2012  
OBNUC 13C  
EXMOD BCM  
OBFRQ 75.45 MHz  
OBSET 127.30 KHz  
OBFIN 44.7 Hz  
POINT 32768  
FREQU 20408.1 Hz  
SCANS 335  
ACQTM 1.606 sec  
PD 1.394 sec  
PW1 6.0 us  
IRNUC 1H  
CTEMP 24.3 c  
SLVNT CDCL3  
EXREF 77.00 ppm  
BF 1.20 Hz  
RGAIN 25

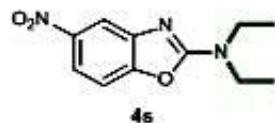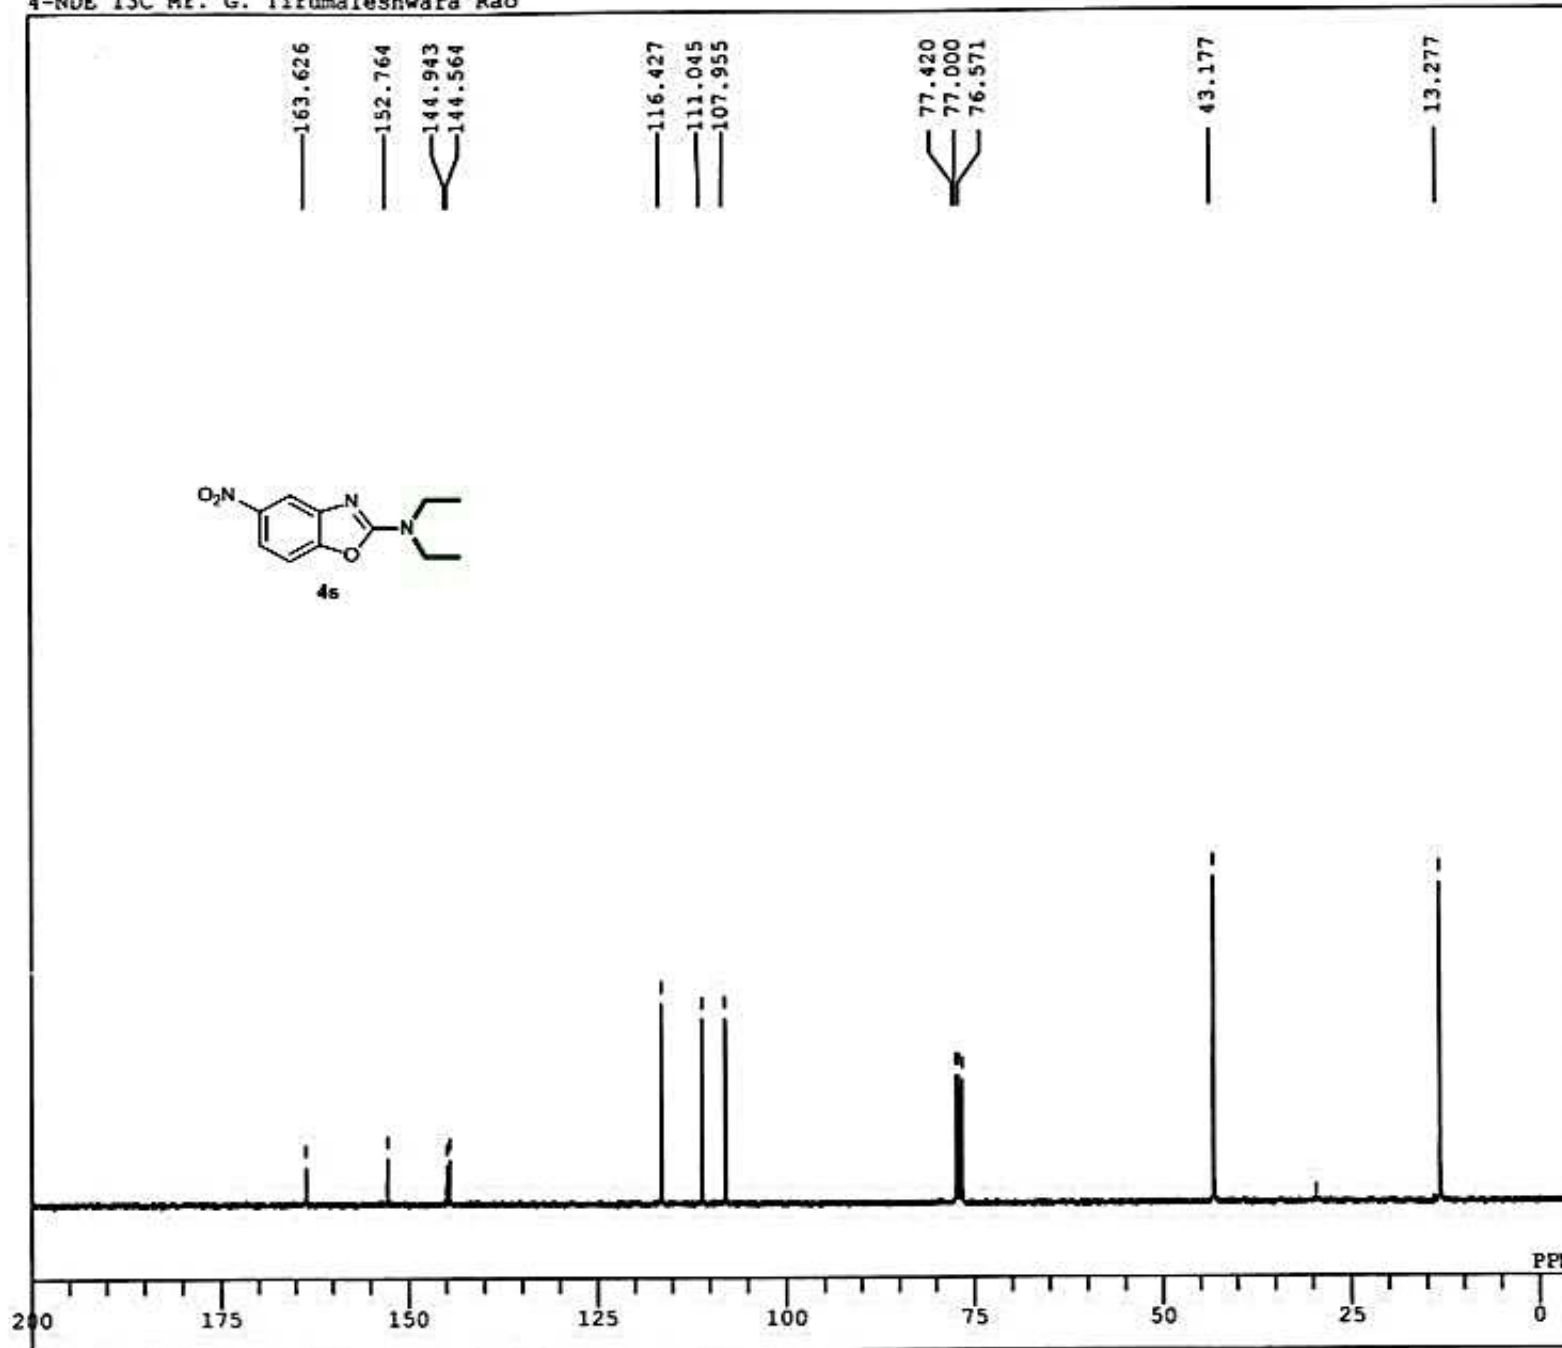

B<sub>48</sub>

C:\K.N. Singh,,I.T\4-Np\_1H.als  
4-Np 1H Mr. A. Bharat Kumar

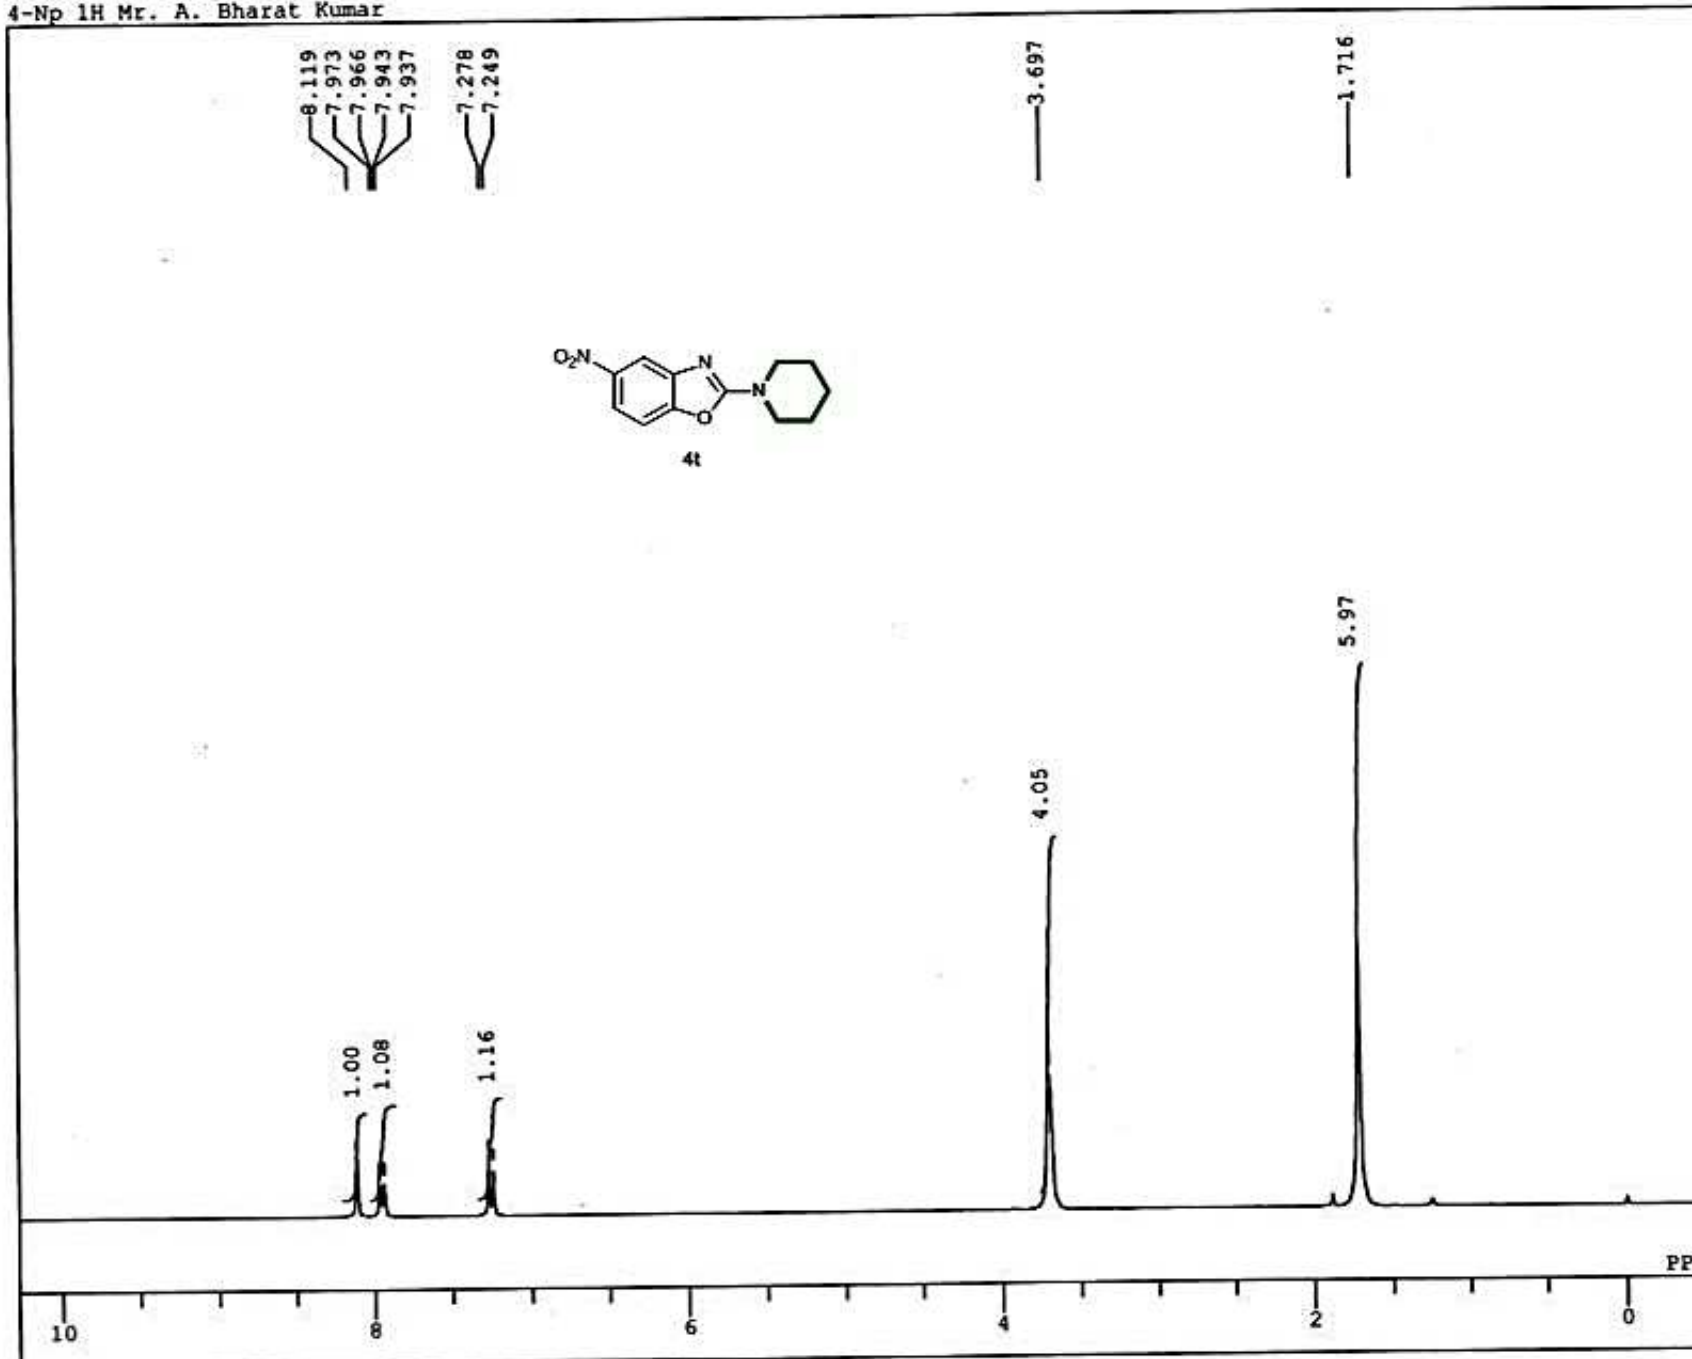

JEOL AL300 FTNMR  
CHEMISTRY DEPARTMENT  
Banaras Hindu University  
VARANASI-221005

Operator : Nagendra Kuma  
Shishir Singh

DFILE C:\K.N. Singh,,I.  
COMNT 4-Np\_1H\_Mr. A. Bh.  
DATIM Mon Oct 08 14:28:  
OBNUC 1H  
EXMOD NON  
OBFRQ 300.40 MHz  
OBSET 130.00 KHz  
OBFIN 1150.0 Hz  
POINT 32768  
FREQU 6016.8 Hz  
SCANS 32  
ACQTM 5.446 sec  
PD 1.547 sec  
PW1 5.2 us  
IRNUC 1H  
CTEMP 19.5 c  
SLVNT CDCL3  
EXREF 0.00 ppm  
BF 1.20 Hz  
RGAIN 12

C:\WINNMR98\Data\4-Np\_1H2BCM\_E1.als  
 4-Np 1H Mr. A. Bharat Kumar

JEOL AL300 FTNMR  
 CHEMISTRY DEPARTMENT  
 Banaras Hindu University,  
 VARANASI-221005

Operator : Nagendra Kumar  
 Shishir Singh

DFILE C:\WINNMR98\Data\4-Np\_  
 COMNT 4-Np\_1H Mr. A. Bharat i  
 DATIM Mon Oct 08 14:54:15 20:  
 OBNUC 13C  
 EXMOD BCM  
 OBFRQ 75.45 MHz  
 OBSET 127.30 KHz  
 OBFIN 44.7 Hz  
 POINT 32768  
 FREQU 20408.1 Hz  
 SCANS 500  
 ACQTM 1.606 sec  
 PD 1.394 sec  
 PW1 6.0 us  
 IRNUC 1H  
 CTEMP 19.1 c  
 SLVNT CDCL3  
 EXREF 77.00 ppm  
 BF 1.20 Hz  
 RGAIN 23

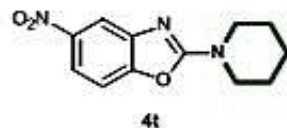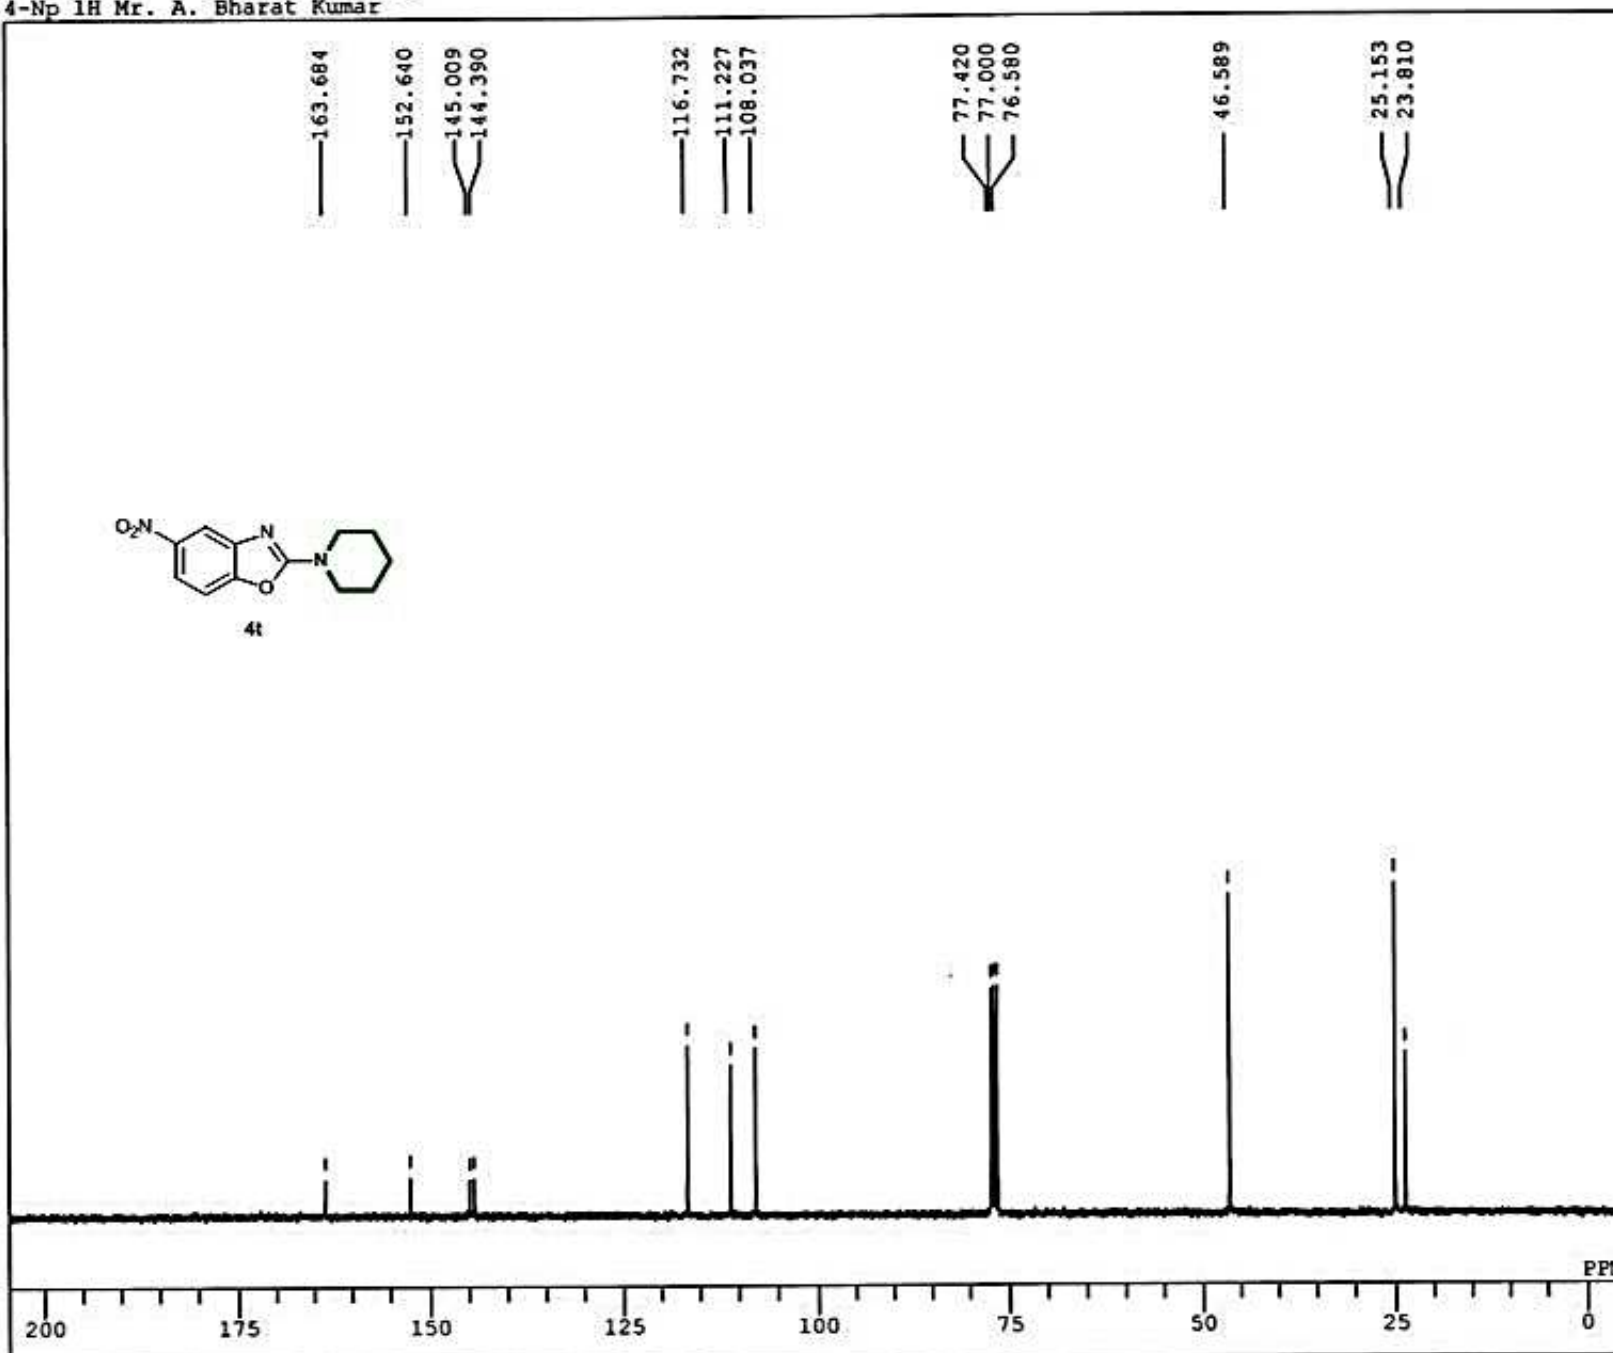

B<sub>50</sub>

C:\K.N. Singh,,I.T\4-NDM\_1H\_.als  
4-NDM 1H Mr.G.Tirumaleswara

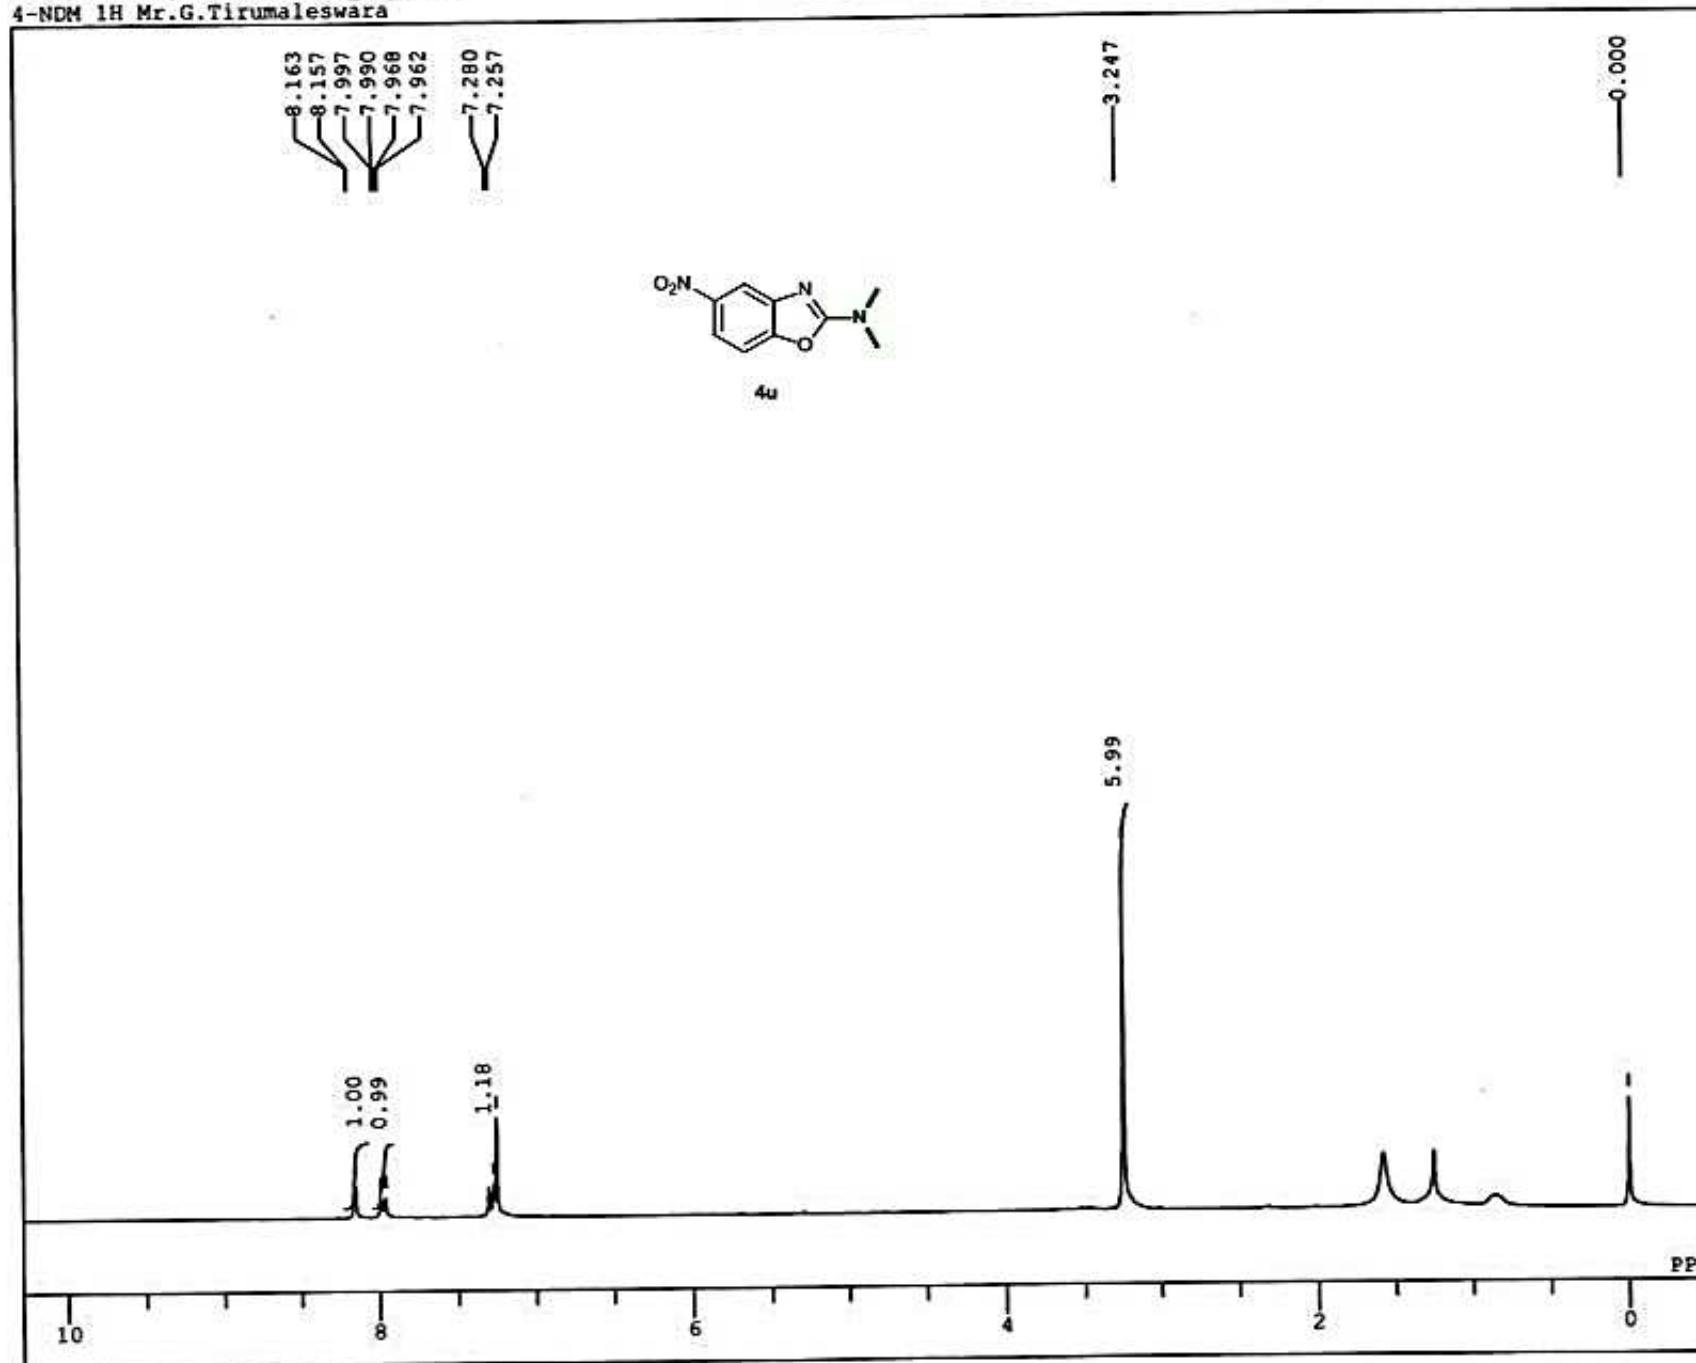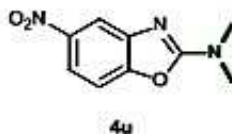

JEOL AL300 FTNMR  
CHEMISTRY DEPARTMENT  
Banaras Hindu University  
VARANASI-221005

Operator : Nagendra Kuma  
Shishir Singh

DFILE C:\K.N. Singh,,I.  
COMNT 4-NDM\_1H Mr.G.Tir  
DATIM Mon Dec 03 15:30:  
OBNUC 1H  
EXMOD NON  
OBFRQ 300.40 MHz  
OBSET 130.00 KHz  
OBFIN 1150.0 Hz  
POINT 32768  
FREQU 9505.7 Hz  
SCANS 20  
ACQTM 3.447 sec  
PD 1.547 sec  
PW1 5.2 us  
IRNUC 1H  
CTEMP 20.7 c  
SLVNT CDCL3  
EXREF 0.00 ppm  
BF 1.20 Hz  
RGAIN 23

C:\K.N. Singh,,I.T\CPB\_1H.als  
CPB 1H Mr.G.Tirumaleshwara Rao

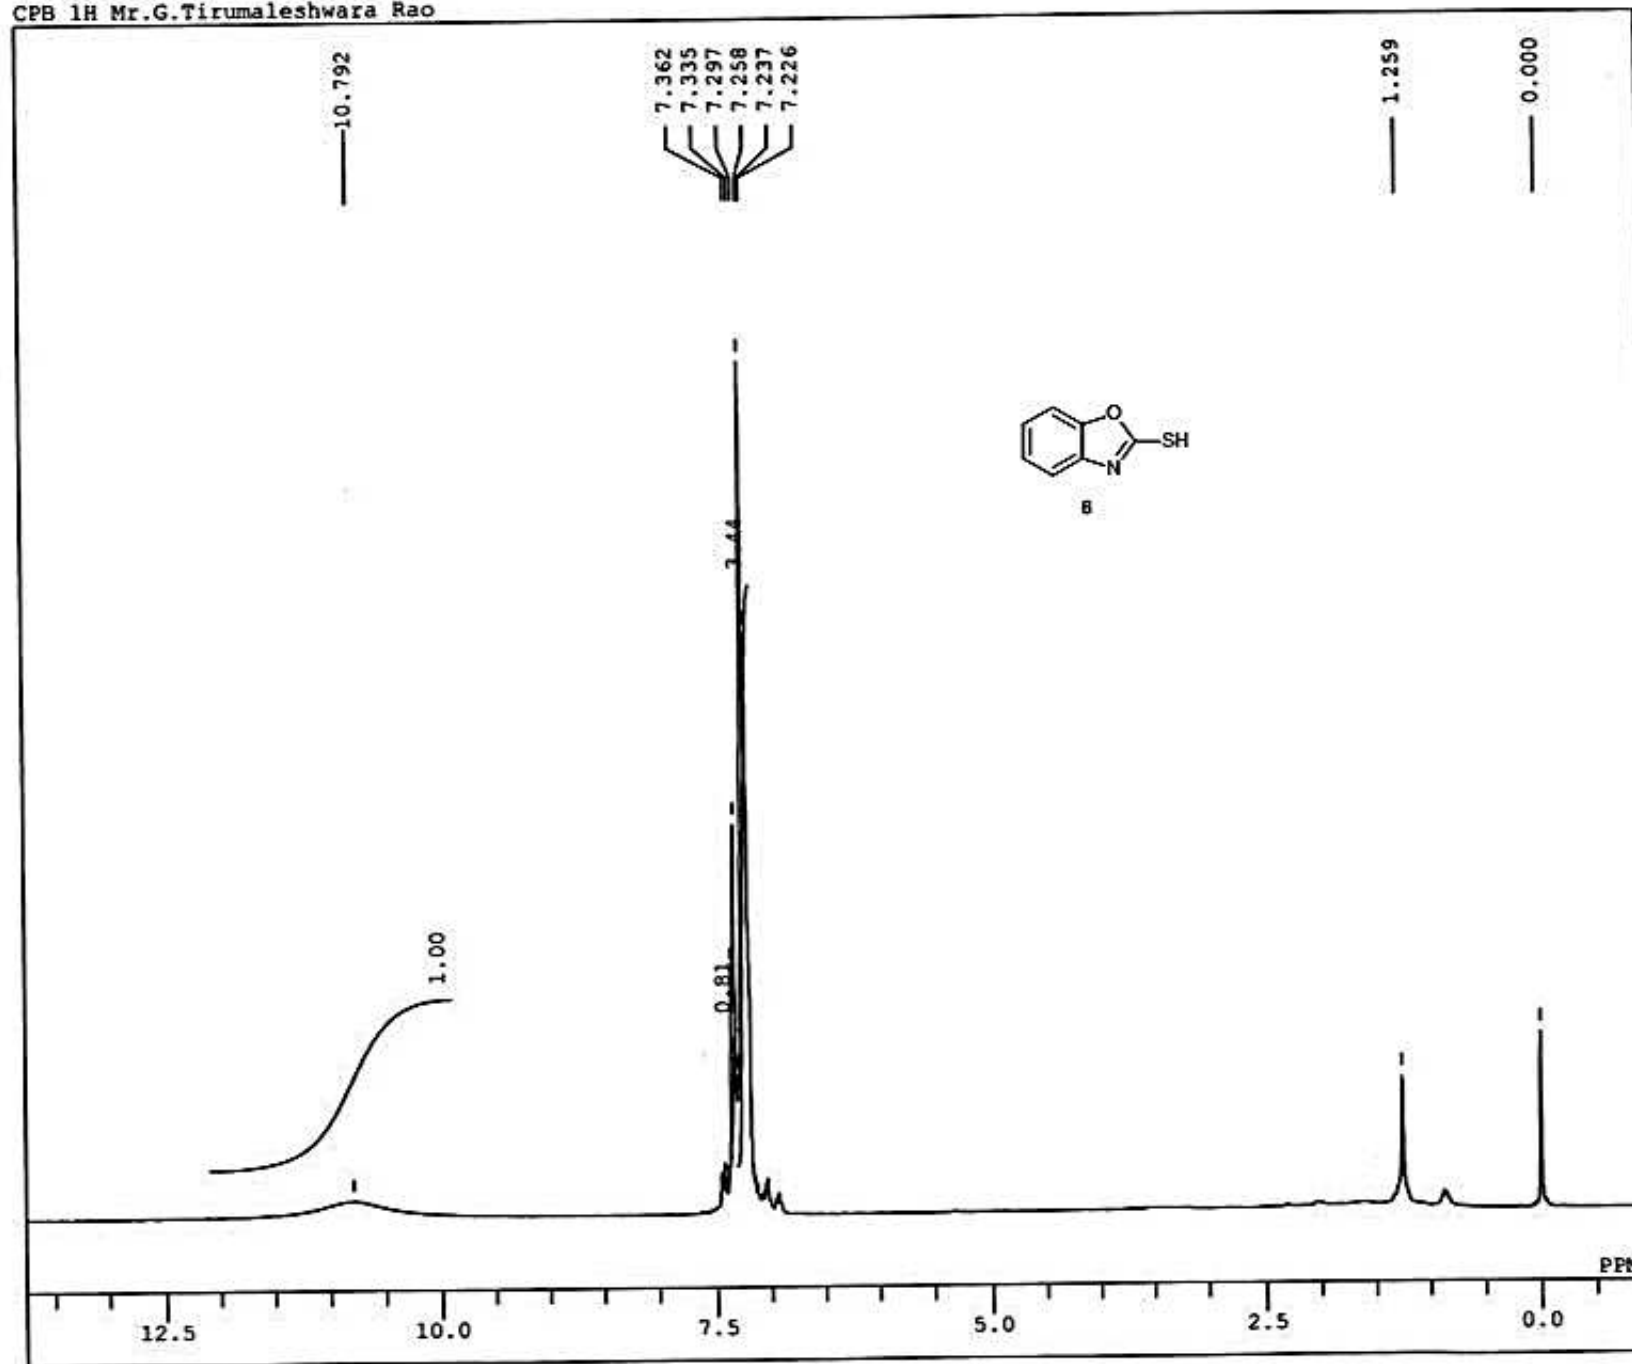

JEOL AL300 FTNMR  
CHEMISTRY DEPARTMENT  
Banaras Hindu University,  
VARANASI-221005

Operator : Nagendra Kumar  
Shishir Singh

DFILE C:\K.N. Singh,,I.T\CPB\_1H.als  
COMNT CPB\_1H\_Mr.G.Tirumaleshwara Rao  
DATIM Mon Oct 01 12:58:16 2013  
OBNUC 1H  
EXMOD NON  
OBFRQ 300.40 MHz  
OBSET 130.00 KHz  
OBFIN 1150.0 Hz  
POINT 32768  
FREQU 9505.7 Hz  
SCANS 44  
ACQTM 3.447 sec  
PD 1.547 sec  
PW1 5.2 us  
IRNUC 1H  
CTEMP 31.6 c  
SLVNT CDCL3  
EXREF 0.00 ppm  
BF 1.20 Hz  
RGAIN 19

C:\K.N. Singh,,I.T\CPB\_13C.als  
CPB 13C Mr.G.Tirumaleshwara Rao

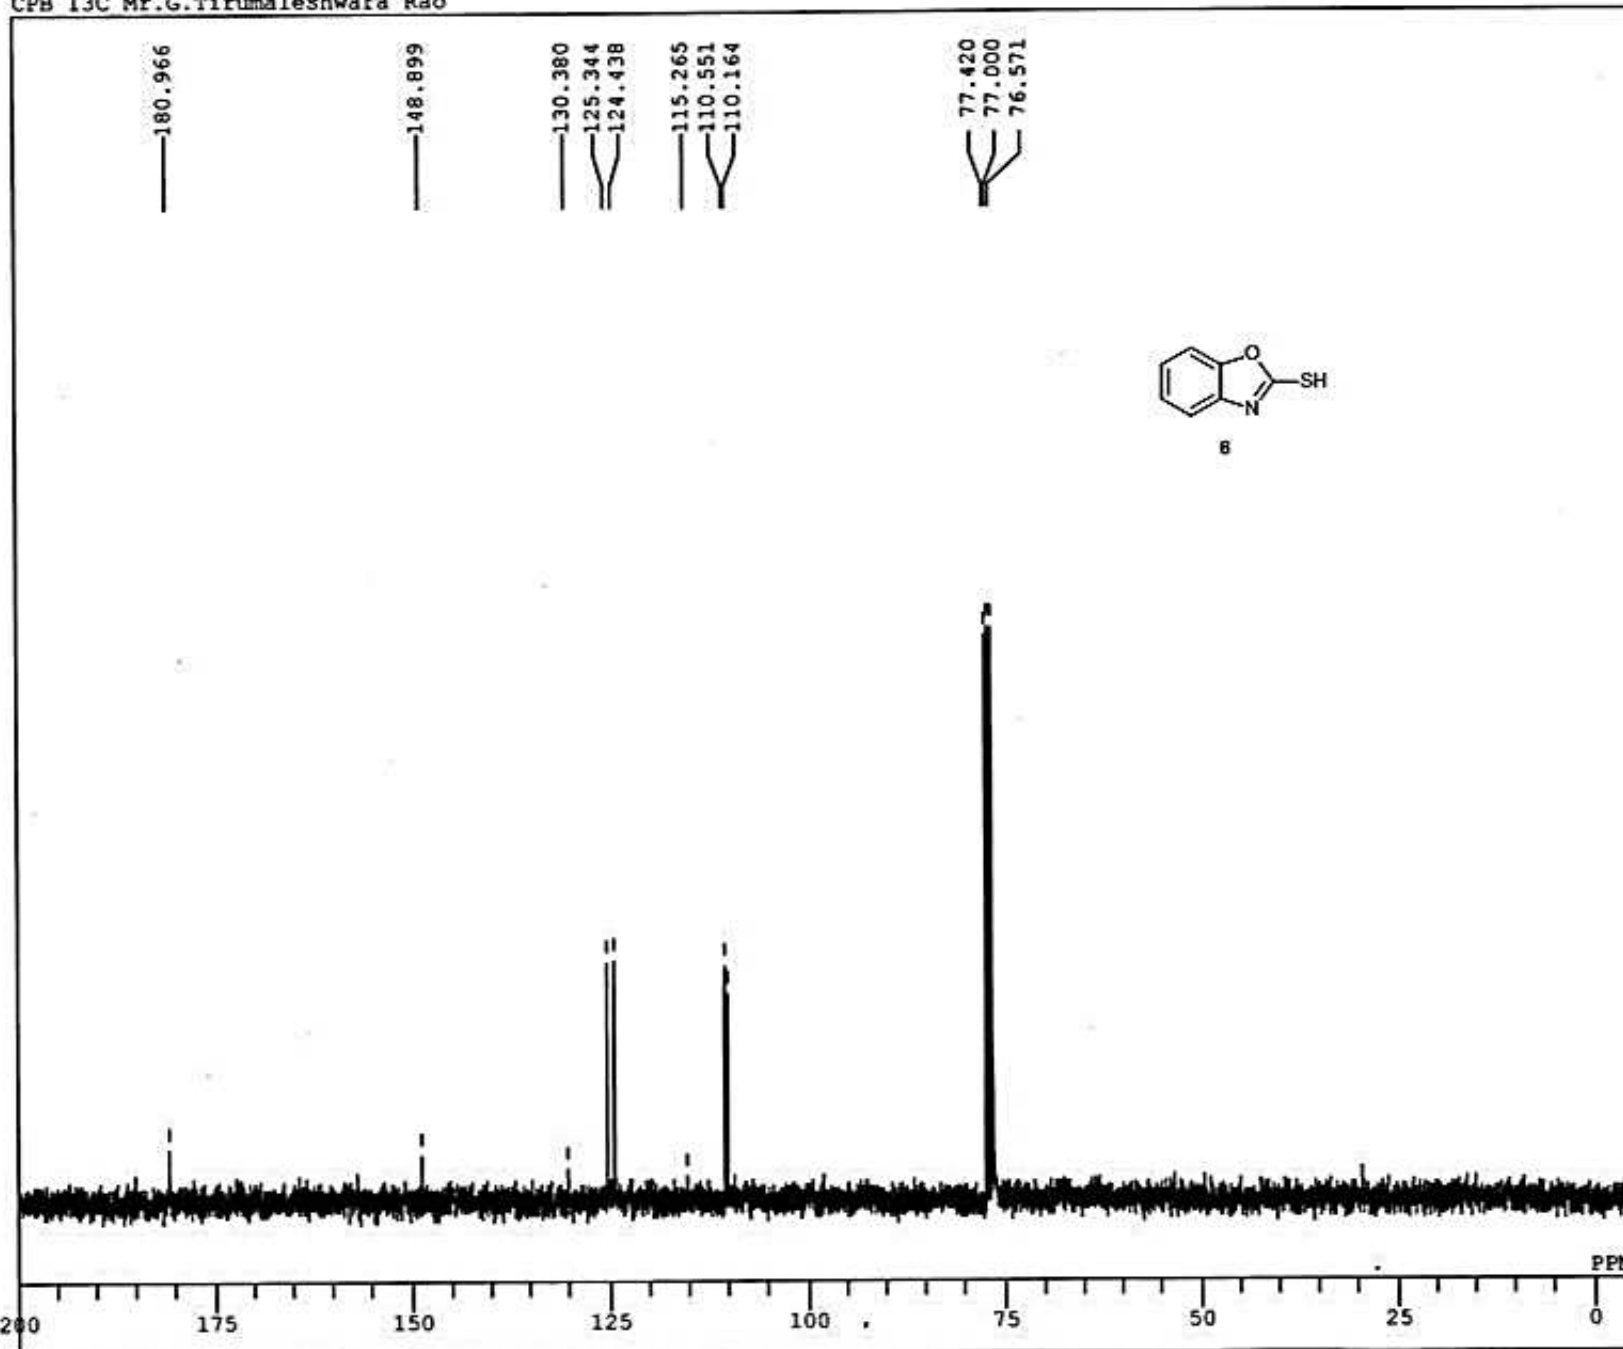

JEOL AL300 FTNMR  
CHEMISTRY DEPARTMENT  
Banaras Hindu University,  
VARANASI-221005

Operator : Nagendra Kumar  
Shishir Singh

DFILE C:\K.N. Singh,,I.T\CPB\_13C.als  
COMNT CPB\_13C\_Mr.G.Tirumaleshwara Rao  
DATIM Mon Oct 01 12:49:56 2013  
OBNUC 13C  
EXMOD BCM  
OBFREQ 75.45 MHz  
OBSET 127.30 KHz  
OBFIN 44.7 Hz  
POINT 32768  
FREQU 20408.1 Hz  
SCANS 214  
ACQTM 1.606 sec  
PD 1.394 sec  
PW1 6.0 us  
IRNUC 1H  
CTEMP 40.2 c  
SLVNT CDCL3  
EXREF 77.00 ppm  
BF 1.20 Hz  
RGAIN 23



C:\K.N. Singh,,I.T\PHU\_1H.als  
PHU\_1H Mr. G. Tirumaleshwara Rao

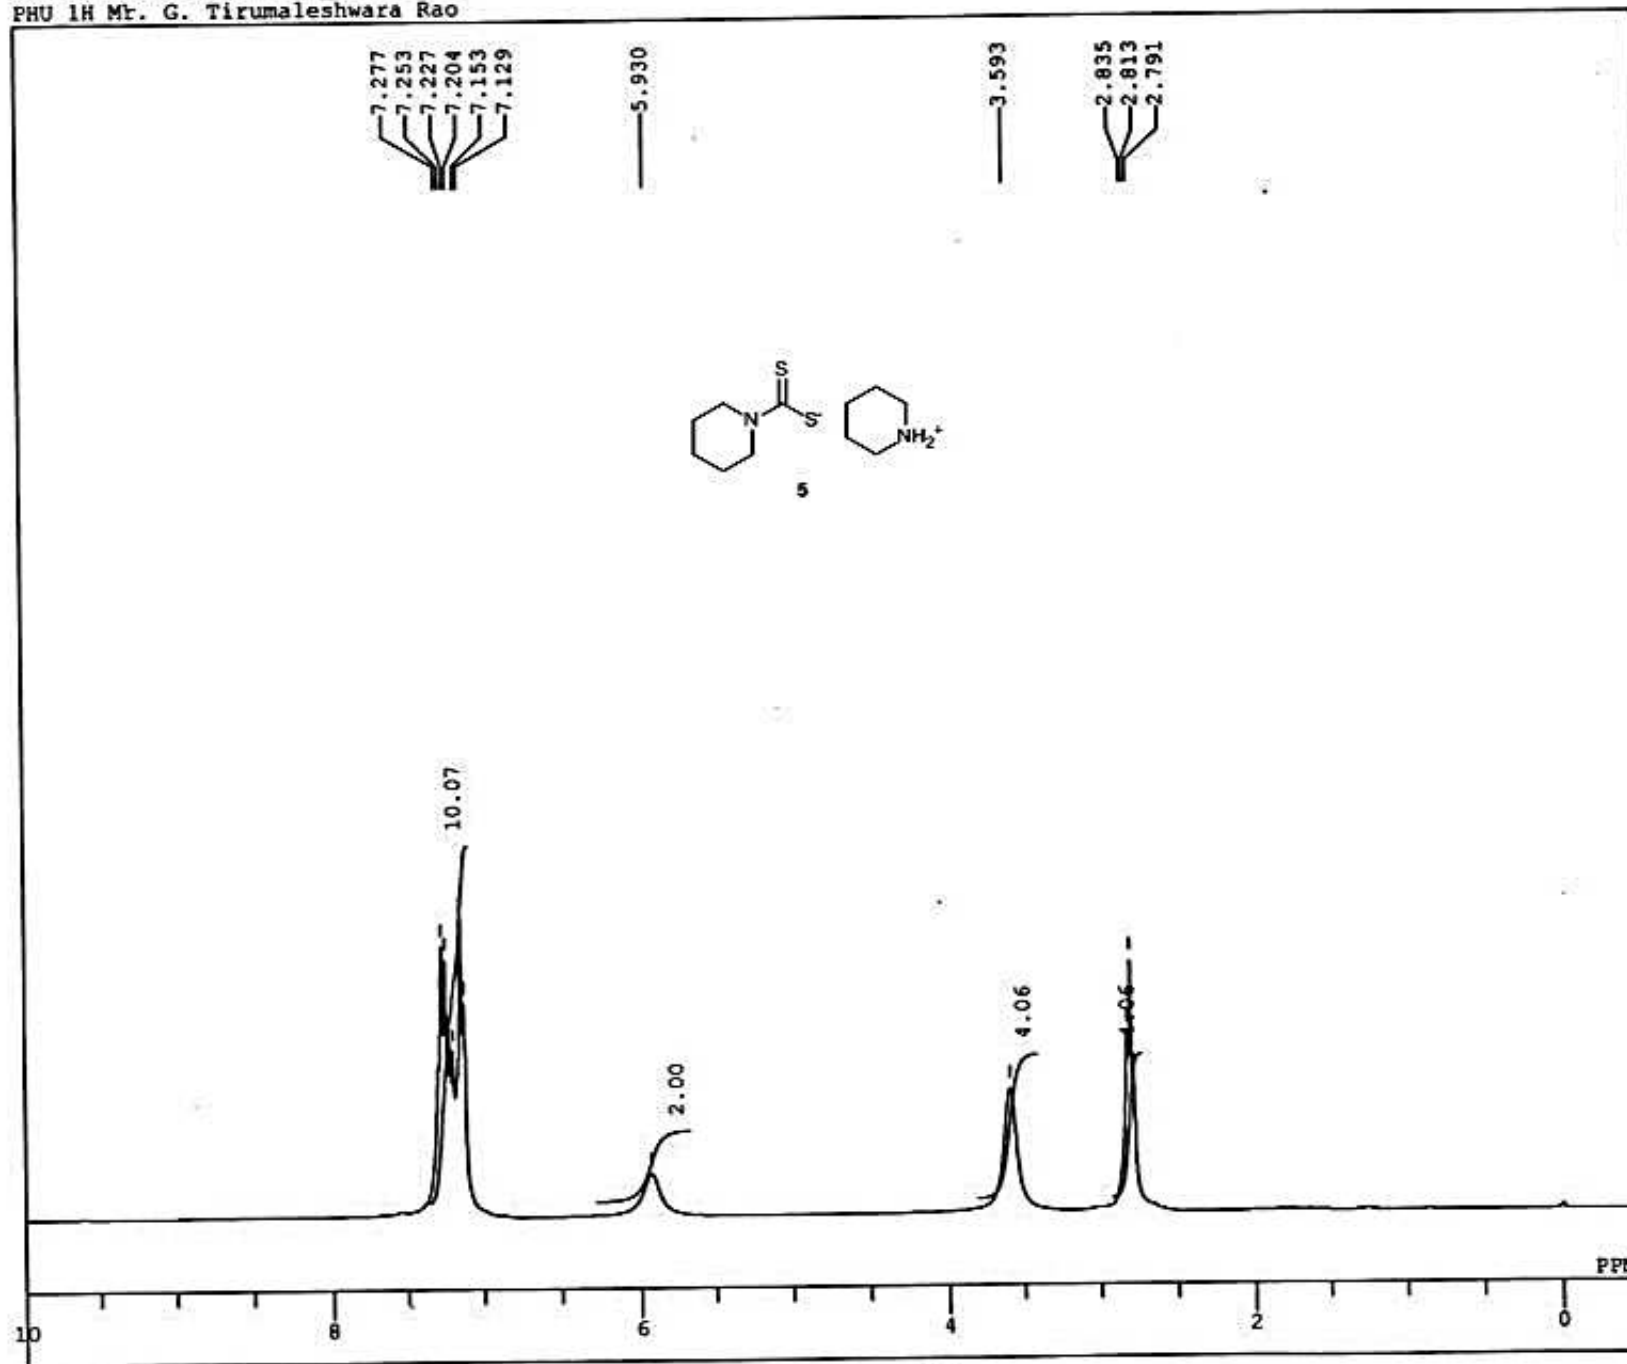

JEOL AL300 FTNMR  
CHEMISTRY DEPARTMENT  
Banaras Hindu University,  
VARANASI-221005

Operator : Nagendra Kumar  
Shishir Singh

DFILE C:\K.N. Singh,,I.T\PHU\_1H  
COMNT PHU\_1H Mr. G. Tirumale:  
DATIM Mon Dec 31 11:38:10 20:  
OBNUC 1H  
EXMOD NON  
OBFRQ 300.40 MHz  
OBSET 130.00 KHz  
OBFIN 1150.0 Hz  
POINT 32768  
FREQU 9505.7 Hz  
SCANS 16  
ACQTM 3.447 sec  
PD 1.547 sec  
PW1 5.2 us  
IRNUC 1H  
CTEMP 22.4 c  
SLVNT CDCL3  
EXREF 0.00 ppm  
BF 1.20 Hz  
RGAIN 11



C:\WINNMR98\COMMON\_DEFAULT.ALS  
PHU 13C Mr. G. Tirumaleshwara Rao

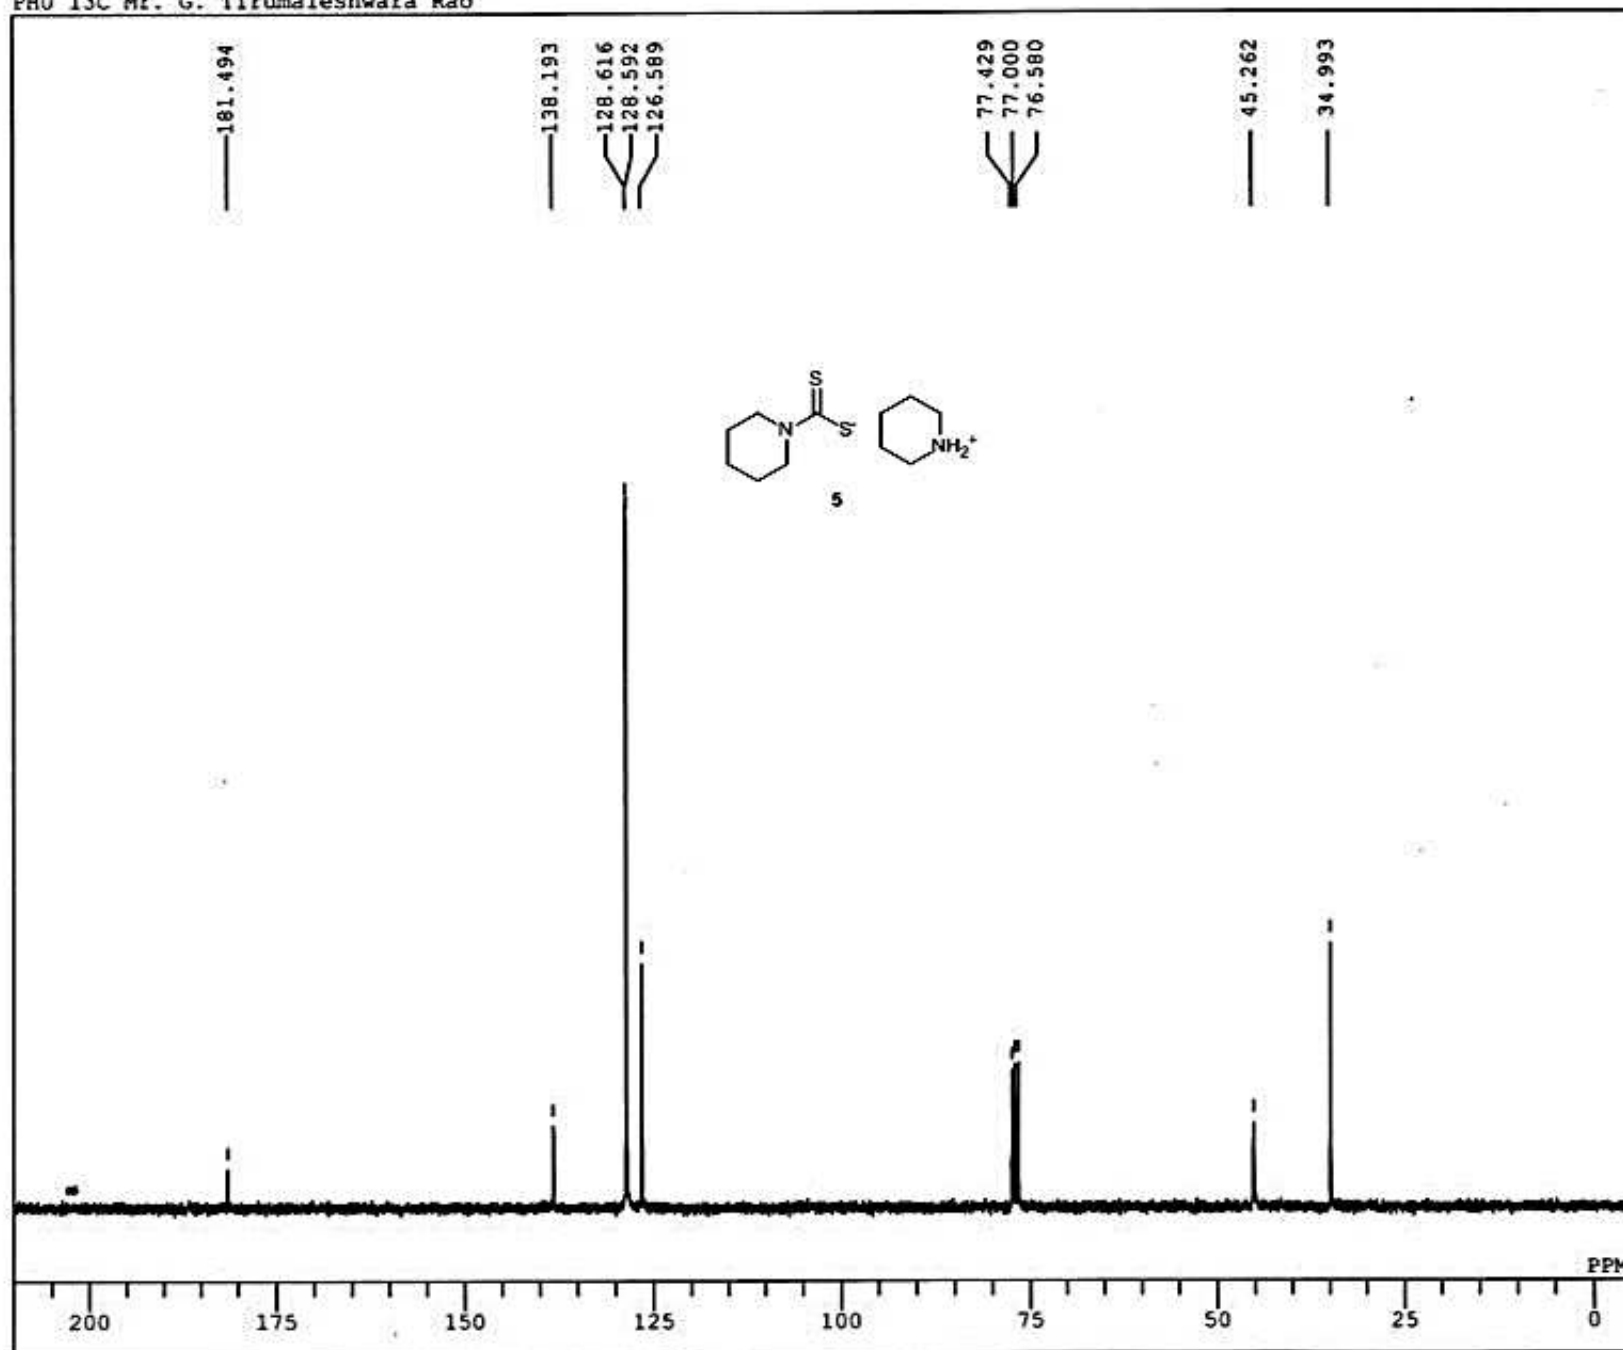

JEOL AL300 FTNMR  
CHEMISTRY DEPARTMENT  
Banaras Hindu University,  
VARANASI-221005

Operator : Nagendra Kumar  
Shishir Singh

DFILE C:\WINNMR98\COMMON\\_DEI  
COMNT PHU\_13C Mr. G. Tirumal:  
DATIM Mon Dec 31 11:34:17 20:  
OBNUC 13C  
EXMOD BCM  
OBFREQ 75.45 MHz  
OBSET 127.30 KHz  
OBFIN 44.7 Hz  
POINT 32768  
FREQU 20408.1 Hz  
SCANS 92  
ACQTM 1.606 sec  
PD 1.394 sec  
PW1 6.0 us  
IRNUC 1H  
CTEMP 21.3 c  
SLVNT CDCL3  
EXREF 77.00 ppm  
BF 1.20 Hz  
RGAIN 25

B<sub>55</sub>

C:\K.N. Singh,,I.T\PI-d\_1H.als  
PI-d 1H Mr.Bhart Kumar

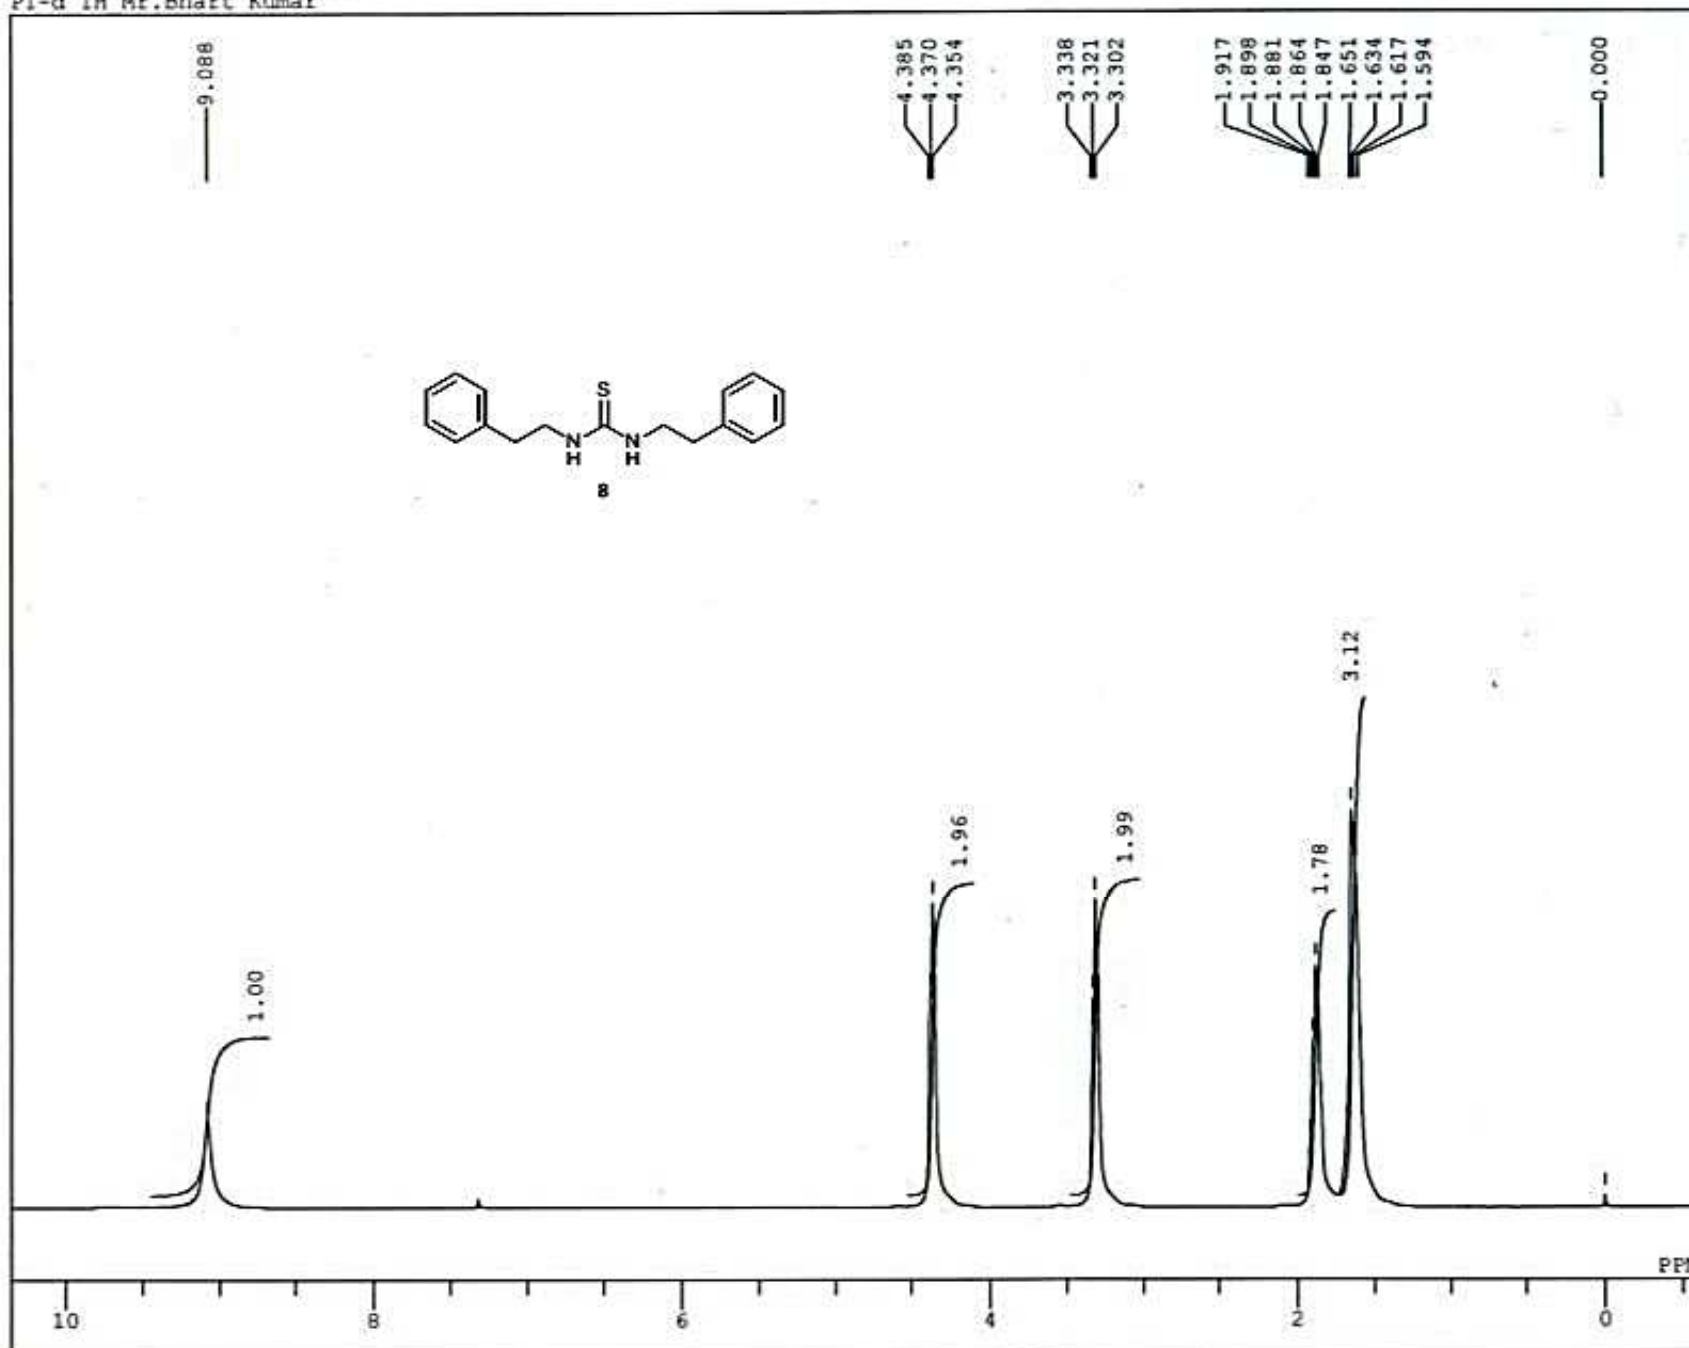

JEOL AL300 FTNMR  
CHEMISTRY DEPARTMENT  
Banaras Hindu University  
VARANASI-221005

Operator : Nagendra Kuma  
Shishir Singh

DFILE C:\K.N. Singh,,I.  
COMNT PI-d 1H Mr.Bhart  
DATIM Wed Jan 02 11:27:  
OBNUC 1H  
EXMOD NON  
OBFRQ 300.40 MHz  
OBSET 130.00 KHz  
OBFIN 1150.0 Hz  
POINT 32768  
FREQU 9505.7 Hz  
SCANS 50  
ACQTM 3.447 sec  
PD 1.547 sec  
PW1 5.2 us  
IRNUC 1H  
CTEMP 22.4 c  
SLVNT CDCL3  
EXREF 0.00 ppm  
BF 1.20 Hz  
RGAIN 10

C:\WINNMR98\COMMON\\_DEFAULT.ALS  
PI-d 13C Mr.Bhart Kumar

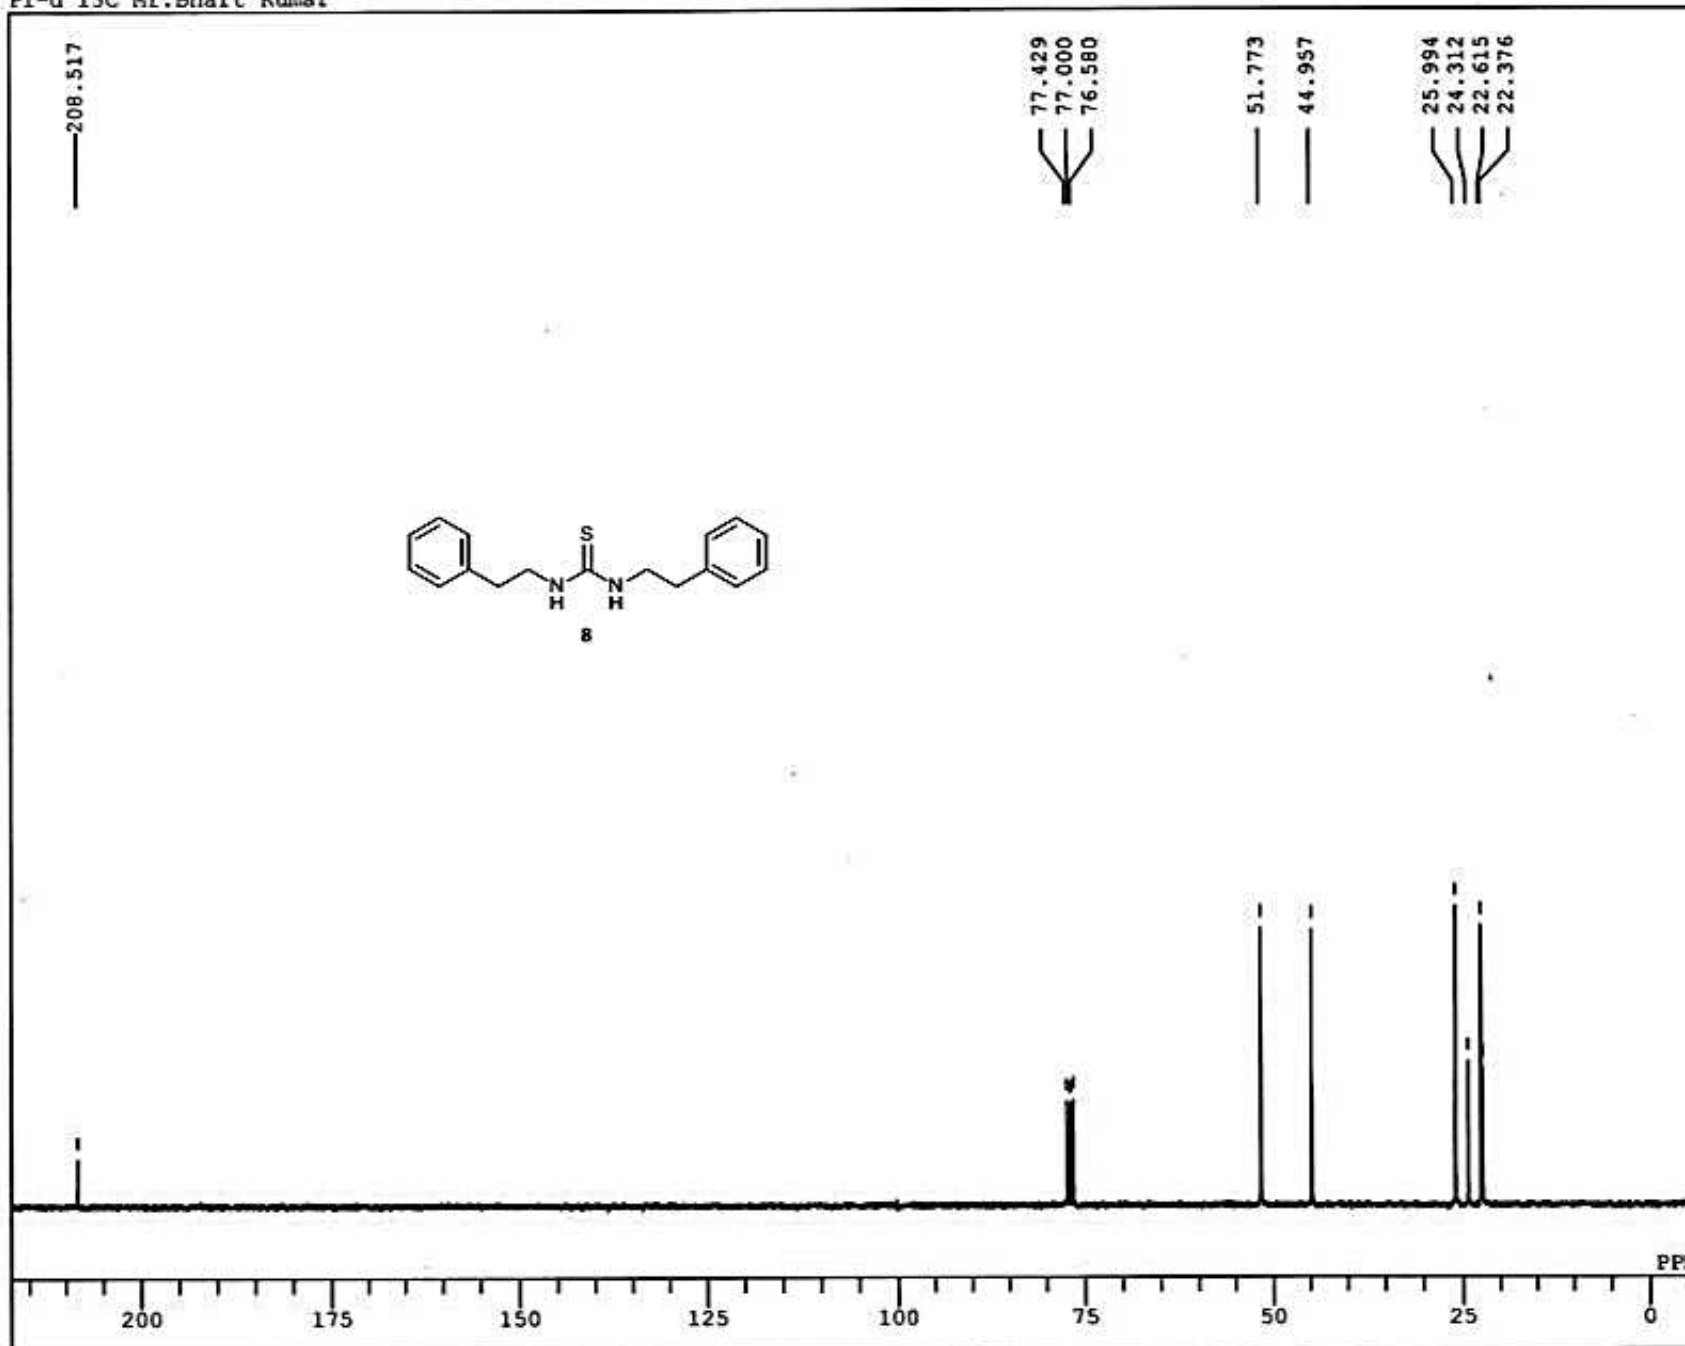

JEOL AL300 FTNMR  
CHEMISTRY DEPARTMENT  
Banaras Hindu University  
VARANASI-221005

Operator : Nagendra Kuma  
Shishir Singh

DFILE C:\WINNMR98\COMMON  
COMNT PI-d 13C Mr.Bhart  
DATIM Wed Jan 02 11:15:  
OBNUC 13C  
EXMOD BCM  
OBFRQ 75.45 MHz  
OBSET 127.30 KHz  
OBFIN 44.7 Hz  
POINT 32768  
FREQU 20408.1 Hz  
SCANS 159  
ACQTM 1.606 sec  
PD 1.394 sec  
PW1 6.0 us  
IRNUC 1H  
CTEMP 24.2 c  
SLVNT CDCL3  
EXREF 77.00 ppm  
BF 1.20 Hz  
RGAIN 25
